# Supplementary material for: Iron Limitation in Klebsiella pneumoniae Defines New Roles for Lon Protease in Homeostasis and Degradation by Quantitative Proteomics
Source: Front Microbiol. 2020 Apr 24;11:546. doi: 10.3389/fmicb.2020.00546 (PMC7194016; doi:10.3389/fmicb.2020.00546)
Supplement: TABLE S1 — Primer sequences for K. pneumoniae genetic manipulation. [file Table_1.XLSX]

## Sheet: Sheet1
(-)log10 p-value	Difference	Protein IDs	Gene name	GOBP name	GOMF name	GOCC name	Keywords	Protein name	Peptides	Sequence coverage [%]	Mol. weight [kDa]	Q-value	Score	LFQ intensity 13	LFQ intensity 14	LFQ intensity 15	LFQ intensity 16	LFQ intensity 17	LFQ intensity 18	LFQ intensity 19	LFQ intensity 20	LFQ intensity 21	LFQ intensity 22	LFQ intensity 23	LFQ intensity 24
1.04762	-1.24406	A6T4E4	thrC	amine metabolic process;carboxylic acid metabolic process;cellular amine metabolic process;cellular amino acid metabolic process;cellular ketone metabolic process;cellular metabolic process;cellular nitrogen compound metabolic process;cellular process;metabolic process;nitrogen compound metabolic process;organic acid metabolic process;oxoacid metabolic process;primary metabolic process;small mole…	binding;cofactor binding;pyridoxal phosphate binding;vitamin B6 binding;vitamin binding		Completeproteome;Referenceproteome		7	32.6	46.695	0	124.08	26.5912	25.9139	26.4164	25.5853	25.8887	23.3049	24.8233	25.5136	22.8956	22.7113	22.8625	26.8246
0.971479	-1.8135	A6T4H9	carA	amine biosynthetic process;amine catabolic process;amine metabolic process;arginine biosynthetic process;arginine metabolic process;biosynthetic process;carbamoyl phosphate biosynthetic process;carbamoyl phosphate metabolic process;carboxylic acid biosynthetic process;carboxylic acid catabolic process;carboxylic acid metabolic process;catabolic process;cellular amine metabolic process;cellular am…	adenyl nucleotide binding;adenyl ribonucleotide binding;ATP binding;binding;carbamoyl-phosphate synthase (glutamine-hydrolyzing) activity;carbon-nitrogen ligase activity, with glutamine as amido-N-donor;catalytic activity;ligase activity;ligase activity, forming carbon-nitrogen bonds;nucleotide binding;purine nucleotide binding;purine ribonucleoside triphosphate binding;purine ribonucleotide bind…		Amino-acidbiosynthesis;Argininebiosynthesis;ATP-binding;Completeproteome;Glutamineamidotransferase;Ligase;Nucleotide-binding;Pyrimidinebiosynthesis;Referenceproteome	Carbamoyl-phosphate synthase small chain	3	21	42.165	0	105.46	25.5919	25.4763	22.6896	25.2356	21.9035	24.6368	23.3338	21.8652	22.9698	23.1721	22.8817	22.5571
1.3764	-1.73416	A6T4I0	carB	amine biosynthetic process;amine metabolic process;arginine biosynthetic process;arginine metabolic process;biosynthetic process;carboxylic acid biosynthetic process;carboxylic acid metabolic process;cellular amine metabolic process;cellular amino acid biosynthetic process;cellular amino acid metabolic process;cellular biosynthetic process;cellular ketone metabolic process;cellular metabolic proc…	adenyl nucleotide binding;adenyl ribonucleotide binding;ATP binding;binding;carbamoyl-phosphate synthase (glutamine-hydrolyzing) activity;carbon-nitrogen ligase activity, with glutamine as amido-N-donor;catalytic activity;cation binding;ion binding;ligase activity;ligase activity, forming carbon-nitrogen bonds;metal ion binding;nucleotide binding;purine nucleotide binding;purine ribonucleoside tr…		Amino-acidbiosynthesis;Argininebiosynthesis;Completeproteome;Magnesium;Manganese;Metal-binding;Pyrimidinebiosynthesis;Referenceproteome	Carbamoyl-phosphate synthase (glutamine-hydrolyzing)	8	14.1	118	0	67.182	25.3369	25.1284	26.7011	25.3295	24.7172	23.268	22.6093	24.9647	23.8119	23.1533	21.7069	23.092
1.15754	-1.3577	A6T4K6	tbpA	establishment of localization;nitrogen compound transport;sulfur compound transport;thiamine transport;transport;vitamin transport	active transmembrane transporter activity;adenyl nucleotide binding;adenyl ribonucleotide binding;ATP binding;ATPase activity;ATPase activity, coupled;ATPase activity, coupled to movement of substances;ATPase activity, coupled to transmembrane movement of substances;binding;catalytic activity;hydrolase activity;hydrolase activity, acting on acid anhydrides;hydrolase activity, acting on acid anhyd…	cell part;external encapsulating structure part;outer membrane-bounded periplasmic space;periplasmic space	Completeproteome;Referenceproteome		6	30.6	36.091	0	38.679	24.6729	24.4535	24.2451	23.9122	24.0979	23.8226	22.2975	21.635	23.217	22.9661	23.1984	22.9646
1.84811	-1.56106	A6T4L8	leuB	amine biosynthetic process;amine metabolic process;biosynthetic process;branched chain family amino acid biosynthetic process;branched chain family amino acid metabolic process;carboxylic acid biosynthetic process;carboxylic acid metabolic process;cellular amine metabolic process;cellular amino acid biosynthetic process;cellular amino acid metabolic process;cellular biosynthetic process;cellular …	3-isopropylmalate dehydrogenase activity;binding;catalytic activity;cation binding;coenzyme binding;cofactor binding;ion binding;magnesium ion binding;metal ion binding;NAD binding;nucleotide binding;oxidoreductase activity;oxidoreductase activity, acting on CH-OH group of donors;oxidoreductase activity, acting on the CH-OH group of donors, NAD or NADP as acceptor	cell part;cytoplasm;intracellular part	Amino-acidbiosynthesis;Branched-chainaminoacidbiosynthesis;Completeproteome;Cytoplasm;Leucinebiosynthesis;Magnesium;Manganese;Metal-binding;NAD;Oxidoreductase;Referenceproteome	3-isopropylmalate dehydrogenase	8	37.5	39.502	0	218.22	25.3441	25.5799	25.1319	25.4766	24.9117	22.7314	23.7366	23.9087	25.01	23.1272	25.3356	24.6847
4.9767	-1.60972	A6T4N7	ftsA	biological regulation;cell cycle;cell division;cellular process;regulation of anatomical structure morphogenesis;regulation of biological process;regulation of biological quality;regulation of cell morphogenesis;regulation of cell shape;regulation of cellular component organization;regulation of cellular process;regulation of developmental process			Cellcycle;Celldivision;Cellshape;Completeproteome;Referenceproteome	Cell division protein ftsA	4	16.7	45.313	0	34.629	24.4435	24.7465	24.8594	24.6678	23.1343	23.154	22.8259	23.1642	22.4509	22.9286	23.5226	23.9058
1.56801	-1.0929	A6T4Q7	aceE		catalytic activity;oxidoreductase activity;oxidoreductase activity, acting on the aldehyde or oxo group of donors;oxidoreductase activity, acting on the aldehyde or oxo group of donors, disulfide as acceptor;pyruvate dehydrogenase (acetyl-transferring) activity;pyruvate dehydrogenase activity		Completeproteome;Oxidoreductase;Pyruvate;Referenceproteome;Thiaminepyrophosphate	Pyruvate dehydrogenase E1 component	26	45.5	99.433	0	323.31	28.9616	28.8706	28.4092	28.4836	28.5751	27.4301	27.4241	26.924	24.9913	24.8177	24.6771	22.8507
1.93579	-1.22086	A6T4W8	dapD	amine biosynthetic process;amine metabolic process;aspartate family amino acid biosynthetic process;aspartate family amino acid metabolic process;biosynthetic process;carboxylic acid biosynthetic process;carboxylic acid metabolic process;cellular amine metabolic process;cellular amino acid biosynthetic process;cellular amino acid metabolic process;cellular biosynthetic process;cellular ketone met…	2,3,4,5-tetrahydropyridine-2,6-dicarboxylate N-succinyltransferase activity;catalytic activity;N-acyltransferase activity;N-succinyltransferase activity;succinyltransferase activity;transferase activity;transferase activity, transferring acyl groups;transferase activity, transferring acyl groups other than amino-acyl groups	cell part;cytoplasm;intracellular part	Acyltransferase;Amino-acidbiosynthesis;Completeproteome;Cytoplasm;Diaminopimelatebiosynthesis;Lysinebiosynthesis;Referenceproteome;Repeat;Transferase	2,3,4,5-tetrahydropyridine-2,6-dicarboxylate N-succinyltransferase	10	69.7	29.832	0	142.75	26.2454	26.3522	25.6594	25.8156	25.634	24.4697	24.295	24.7904	24.3019	23.3713	24.5645	23.1841
1.56395	-1.03303	A6T4Y7	accA	biosynthetic process;carboxylic acid biosynthetic process;carboxylic acid metabolic process;cellular biosynthetic process;cellular ketone metabolic process;cellular lipid metabolic process;cellular metabolic process;cellular process;fatty acid biosynthetic process;fatty acid metabolic process;lipid biosynthetic process;lipid metabolic process;metabolic process;monocarboxylic acid metabolic proces…	acetyl-CoA carboxylase activity;adenyl nucleotide binding;adenyl ribonucleotide binding;ATP binding;binding;catalytic activity;CoA carboxylase activity;ligase activity;ligase activity, forming carbon-carbon bonds;nucleotide binding;purine nucleotide binding;purine ribonucleoside triphosphate binding;purine ribonucleotide binding;ribonucleotide binding	acetyl-CoA carboxylase complex;cell part;cytoplasmic part;intracellular part;macromolecular complex;protein complex	ATP-binding;Completeproteome;Cytoplasm;Fattyacidbiosynthesis;Fattyacidmetabolism;Ligase;Lipidbiosynthesis;Lipidmetabolism;Nucleotide-binding;Referenceproteome	Acetyl-coenzyme A carboxylase carboxyl transferase subunit alpha	3	14.1	35.311	0	60.748	24.5884	24.2804	23.7528	23.9589	23.9719	23.0467	22.5433	22.8864	22.1473	23.5939	23.209	22.5172
1.14555	-1.60515	A6T595	tauD		catalytic activity;dioxygenase activity;oxidoreductase activity		Completeproteome;Dioxygenase;Oxidoreductase;Referenceproteome		6	43.8	32.365	0	69.932	25.72	25.2718	25.5804	25.5834	25.3901	22.7703	22.594	24.9807	21.6696	23.3043	22.4523	22.3394
1.61932	-1.57884	A6T5I0	clpP		catalytic activity;endopeptidase activity;hydrolase activity;peptidase activity;peptidase activity, acting on L-amino acid peptides;serine hydrolase activity;serine-type endopeptidase activity;serine-type peptidase activity	cell part;cytoplasm;intracellular part	Completeproteome;Cytoplasm;Hydrolase;Protease;Referenceproteome;Serineprotease	ATP-dependent Clp protease proteolytic subunit	4	31.4	21.692	0	61.28	26.2829	26.0255	25.291	24.3543	24.7505	23.5232	23.9276	23.4371	22.8159	24.1168	22.755	22.3899
1.9397	-3.15098	A6T5I2	lon	cellular process;cellular response to stimulus;cellular response to stress;macromolecule metabolic process;metabolic process;misfolded or incompletely synthesized protein catabolic process;primary metabolic process;protein metabolic process;proteolysis;proteolysis involved in cellular protein catabolic process;response to stimulus;response to stress	adenyl nucleotide binding;adenyl ribonucleotide binding;ATP binding;ATPase activity;ATPase activity, coupled;ATP-dependent peptidase activity;binding;catalytic activity;DNA binding;endopeptidase activity;hydrolase activity;hydrolase activity, acting on acid anhydrides;hydrolase activity, acting on acid anhydrides, in phosphorus-containing anhydrides;nucleic acid binding;nucleoside-triphosphatase …	cell part;cytoplasm;intracellular part	ATP-binding;Completeproteome;Cytoplasm;DNA-binding;Hydrolase;Nucleotide-binding;Protease;Referenceproteome;Repeat;Serineprotease;Stressresponse	Lon protease	5	11.6	87.471	0	126.48	26.4955	26.8744	26.8411	25.8151	25.8579	22.2248	22.7984	22.5412	26.038	23.6457	23.2152	21.3299
1.3708	1.98811	A6T5I3	hupB	cellular component organization;cellular component organization at cellular level;cellular component organization or biogenesis;cellular component organization or biogenesis at cellular level;cellular macromolecule metabolic process;cellular metabolic process;cellular nitrogen compound metabolic process;cellular process;chromosome condensation;chromosome organization;DNA conformation change;DNA m…	binding;DNA binding;nucleic acid binding		Completeproteome;DNA-binding;DNAcondensation;Referenceproteome		7	82.2	9.1374	0	323.31	25.2529	27.0619	28.2027	27.5951	27.7517	29.283	29.818	29.2122	30.0069	27.3076	29.6061	28.7707
3.63821	-2.15691	A6T611	KPN_00582	cellular process;establishment of localization;transmembrane transport;transport		ATP-binding cassette (ABC) transporter complex;cell part;macromolecular complex;membrane part;protein complex	Completeproteome;Referenceproteome		5	21.5	56.767	0	35.721	24.4794	24.3872	25.1726	24.5317	22.034	22.4537	22.408	23.0475	22.7189	23.3223	22.4255	22.9381
2.07691	-1.49213	A6T6A3	leuS	amine metabolic process;amino acid activation;carboxylic acid metabolic process;cellular amine metabolic process;cellular amino acid metabolic process;cellular ketone metabolic process;cellular macromolecule metabolic process;cellular metabolic process;cellular nitrogen compound metabolic process;cellular process;leucyl-tRNA aminoacylation;macromolecule metabolic process;metabolic process;ncRNA m…	adenyl nucleotide binding;adenyl ribonucleotide binding;aminoacyl-tRNA editing activity;aminoacyl-tRNA ligase activity;ATP binding;binding;carboxylic ester hydrolase activity;catalytic activity;hydrolase activity;hydrolase activity, acting on ester bonds;leucine-tRNA ligase activity;ligase activity;ligase activity, forming aminoacyl-tRNA and related compounds;ligase activity, forming carbon-oxyge…	cell part;cytoplasm;intracellular part	Aminoacyl-tRNAsynthetase;ATP-binding;Completeproteome;Cytoplasm;Ligase;Nucleotide-binding;Proteinbiosynthesis;Referenceproteome	Leucine--tRNA ligase	9	21.2	97.055	0	63.254	24.8963	24.449	24.0344	23.865	23.6733	22.8424	22.526	22.2347	22.2638	23.1967	23.1195	21.8645
1.6687	-1.16411	A6T6E9	gltA	acetyl-CoA catabolic process;acetyl-CoA metabolic process;carbohydrate metabolic process;catabolic process;cellular carbohydrate metabolic process;cellular catabolic process;cellular metabolic process;cellular process;coenzyme catabolic process;coenzyme metabolic process;cofactor catabolic process;cofactor metabolic process;metabolic process;primary metabolic process;tricarboxylic acid cycle	catalytic activity;citrate (Si)-synthase activity;transferase activity;transferase activity, transferring acyl groups;transferase activity, transferring acyl groups, acyl groups converted into alkyl on transfer	cell part;cytoplasm;intracellular part	Completeproteome;Referenceproteome;Transferase;Tricarboxylicacidcycle	Citrate synthase	12	50.1	48.001	0	117.87	25.9832	25.8388	25.1749	24.7588	24.6301	23.6419	24.1384	24.689	22.4804	23.0598	23.5365	24.6814
1.98277	-1.59043	A6T6F4	sucA	acetyl-CoA catabolic process;acetyl-CoA metabolic process;catabolic process;cellular catabolic process;cellular metabolic process;cellular process;coenzyme catabolic process;coenzyme metabolic process;cofactor catabolic process;cofactor metabolic process;metabolic process;tricarboxylic acid cycle	binding;catalytic activity;coenzyme binding;cofactor binding;oxidoreductase activity;oxidoreductase activity, acting on the aldehyde or oxo group of donors;oxidoreductase activity, acting on the aldehyde or oxo group of donors, disulfide as acceptor;oxoglutarate dehydrogenase (succinyl-transferring) activity;thiamine pyrophosphate binding;vitamin binding		Completeproteome;Referenceproteome		5	10.4	105.17	0	66.823	24.5145	24.4522	25.3118	24.6714	22.4161	23.32	22.6968	24.1553	21.7975	22.9382	22.7463	22.8021
2.19594	-1.04995	A6T6Q8	ompX			cell outer membrane;cell part;external encapsulating structure part;integral to membrane;intrinsic to membrane;membrane;membrane part;outer membrane	Completeproteome;Referenceproteome		7	57.6	18.463	0	323.31	27.5697	27.4895	27.2843	27.0729	26.8527	26.2845	25.7254	26.354	25.6714	26.9187	25.6895	23.2349
1.25659	-1.15464	A6T6S8	yliB	cellular process;establishment of localization;transmembrane transport;transport		ATP-binding cassette (ABC) transporter complex;cell part;macromolecular complex;membrane part;protein complex	Completeproteome;Referenceproteome		4	12.3	56.445	0	46.238	24.1359	24.1661	23.7534	23.8136	23.5048	23.2653	23.067	21.4134	22.5788	23.1933	23.475	23.0996
1.76064	-1.13679	A6T6Y5	trxB	cellular metabolic process;cellular process;cellular response to chemical stimulus;cellular response to oxidative stress;cellular response to oxygen radical;cellular response to reactive oxygen species;cellular response to stimulus;cellular response to stress;cellular response to superoxide;metabolic process;reactive oxygen species metabolic process;removal of superoxide radicals;response to chem…	antioxidant activity;binding;catalytic activity;coenzyme binding;cofactor binding;flavin adenine dinucleotide binding;oxidoreductase activity;oxidoreductase activity, acting on a sulfur group of donors;oxidoreductase activity, acting on a sulfur group of donors, NAD or NADP as acceptor;oxidoreductase activity, acting on NADH or NADPH;thioredoxin-disulfide reductase activity	cell part;cytoplasm;intracellular part	Completeproteome;FAD;Flavoprotein;NADP;Oxidoreductase;Redox-activecenter;Referenceproteome	Thioredoxin reductase	5	31.7	35.65	0	41.35	23.9974	23.6127	23.0528	23.1042	22.879	21.584	22.3678	22.3892	23.6345	23.5767	22.7535	22.3541
1.72962	-1.07138	A6T6Z6;A6TAU7	pflB;tdcE	carbohydrate metabolic process;metabolic process;primary metabolic process	acetyltransferase activity;C-acetyltransferase activity;C-acyltransferase activity;catalytic activity;formate C-acetyltransferase activity;transferase activity;transferase activity, transferring acyl groups;transferase activity, transferring acyl groups other than amino-acyl groups	cell part;cytoplasm;intracellular part	Completeproteome;Organicradical;Referenceproteome;Transferase		27	54.5	85.145	0	323.31	27.4256	27.3177	26.6617	27.224	26.6436	25.4351	25.7719	26.4927	24.9817	25.8752	22.2935	28.5843
1.99654	-1.14341	A6T720	aspC	amine metabolic process;biosynthetic process;carboxylic acid metabolic process;cellular amine metabolic process;cellular amino acid metabolic process;cellular ketone metabolic process;cellular metabolic process;cellular nitrogen compound metabolic process;cellular process;metabolic process;nitrogen compound metabolic process;organic acid metabolic process;oxoacid metabolic process;primary metabol…	binding;catalytic activity;cofactor binding;pyridoxal phosphate binding;transaminase activity;transferase activity;transferase activity, transferring nitrogenous groups;vitamin B6 binding;vitamin binding		Aminotransferase;Completeproteome;Pyridoxalphosphate;Referenceproteome;Transferase		11	40.4	43.539	0	252.19	27.0133	26.4852	25.7489	26.5207	25.4373	25.5465	24.8093	25.4014	25.0178	25.6994	23.6465	23.9585
1.33351	-1.123	A6T792	yccJ				Completeproteome;Referenceproteome		2	52	8.5624	0	23.572	24.4485	24.1474	24.1089	24.0504	22.9865	24.2949	22.2219	22.76	24.0459	22.582	22.6354	23.3775
1.96602	1.39626	A6T7E9	rpmF	biosynthetic process;cellular biosynthetic process;cellular macromolecule biosynthetic process;cellular macromolecule metabolic process;cellular metabolic process;cellular process;cellular protein metabolic process;macromolecule biosynthetic process;macromolecule metabolic process;metabolic process;primary metabolic process;protein metabolic process;translation	structural constituent of ribosome;structural molecule activity	cell part;intracellular organelle part;intracellular part;large ribosomal subunit;macromolecular complex;organelle part;ribonucleoprotein complex	Completeproteome;Referenceproteome;Ribonucleoprotein;Ribosomalprotein	50S ribosomal protein L32	3	52.6	6.4303	0	89.368	23.9464	24.0944	25.2958	24.9445	25.3906	26.0763	26.0781	26.3212	26.4679	23.3677	25.9258	26.9393
3.48598	-1.92407	A6T7R7	ydjA		catalytic activity;oxidoreductase activity		Completeproteome;Flavoprotein;FMN;Referenceproteome		3	30.1	20.189	0	59.424	24.2164	24.2325	24.8854	24.1027	22.7041	22.3926	22.7375	21.9065	22.4822	23.1314	23.7933	24.2671
3.00896	-1.01311	A6T7Z6	fabI	biosynthetic process;carboxylic acid biosynthetic process;carboxylic acid metabolic process;cellular biosynthetic process;cellular ketone metabolic process;cellular lipid metabolic process;cellular metabolic process;cellular process;fatty acid biosynthetic process;fatty acid metabolic process;lipid biosynthetic process;lipid metabolic process;metabolic process;monocarboxylic acid metabolic proces…	catalytic activity;enoyl-[acyl-carrier-protein] reductase (NADH) activity;fatty acid synthase activity;oxidoreductase activity;oxidoreductase activity, acting on the CH-CH group of donors;oxidoreductase activity, acting on the CH-CH group of donors, NAD or NADP as acceptor;transferase activity;transferase activity, transferring acyl groups;transferase activity, transferring acyl groups other than…		Completeproteome;Fattyacidbiosynthesis;Fattyacidmetabolism;Lipidbiosynthesis;Lipidmetabolism;NAD;Oxidoreductase;Referenceproteome	Enoyl-[acyl-carrier-protein] reductase [NADH]	10	72.1	27.911	0	129.96	26.1915	26.1248	26.0775	26.1904	25.2539	25.5335	24.7629	24.9814	24.6551	25.5833	24.0735	22.5195
1.61222	-1.19381	A6T8G0	ldhA		binding;catalytic activity;coenzyme binding;cofactor binding;NAD binding;nucleotide binding;oxidoreductase activity;oxidoreductase activity, acting on CH-OH group of donors;oxidoreductase activity, acting on the CH-OH group of donors, NAD or NADP as acceptor		Completeproteome;Oxidoreductase;Referenceproteome		2	13.4	36.363	0	51.102	24.4904	24.3803	23.714	23.7307	21.8705	23.2473	23.332	23.0903	22.0433	23.6263	23.1098	22.9004
0.877883	-1.44556	A6T8N7	pntB		binding;catalytic activity;coenzyme binding;cofactor binding;NAD(P)+ transhydrogenase (AB-specific) activity;NAD(P)+ transhydrogenase activity;NADP binding;nucleotide binding;oxidoreductase activity;oxidoreductase activity, acting on NADH or NADPH;oxidoreductase activity, acting on NADH or NADPH, NAD or NADP as acceptor	cell part;integral to membrane;intrinsic to membrane;membrane;membrane part;plasma membrane	Cellinnermembrane;Cellmembrane;Completeproteome;Membrane;NAD;NADP;Oxidoreductase;Referenceproteome	NAD(P) transhydrogenase subunit beta	5	16.9	48.799	0	41.831	26.8761	26.7853	26.7641	26.8765	26.2104	22.894	26.3295	26.0859	22.5575	22.6696	22.6648	22.6818
1.4675	-1.635	A6T9K7	maeA	carboxylic acid metabolic process;cellular ketone metabolic process;cellular metabolic process;cellular process;dicarboxylic acid metabolic process;malate metabolic process;metabolic process;organic acid metabolic process;oxoacid metabolic process;small molecule metabolic process	binding;carbon-carbon lyase activity;carboxy-lyase activity;catalytic activity;cation binding;coenzyme binding;cofactor binding;ion binding;lyase activity;malate dehydrogenase (decarboxylating) activity;malate dehydrogenase activity;malic enzyme activity;metal ion binding;NAD binding;nucleotide binding;oxaloacetate decarboxylase activity;oxidoreductase activity;oxidoreductase activity, acting on …		Completeproteome;Metal-binding;NAD;Oxidoreductase;Referenceproteome	NAD-dependent malic enzyme	2	6.9	62.771	0	32.197	24.9932	24.5949	24.1334	22.4563	21.7932	22.6059	22.4505	22.7882	23.3145	22.7662	22.9897	21.9482
4.48744	-2.51206	A6TA02	ydhD	biological regulation;cell redox homeostasis;cellular homeostasis;cellular process;homeostatic process;regulation of biological process;regulation of biological quality;regulation of cellular process	catalytic activity;disulfide oxidoreductase activity;electron carrier activity;oxidoreductase activity;oxidoreductase activity, acting on a sulfur group of donors;protein disulfide oxidoreductase activity		Completeproteome;Referenceproteome	Glutaredoxin	2	28.7	12.903	0	53.139	24.8607	25.1247	24.9682	25.487	22.7211	22.9579	22.6151	22.0982	23.4612	24.3108	22.5244	22.5475
1.75614	-1.41899	A6TA04	sodB		antioxidant activity;binding;catalytic activity;cation binding;ion binding;metal ion binding;oxidoreductase activity;oxidoreductase activity, acting on superoxide radicals as acceptor;superoxide dismutase activity		Completeproteome;Oxidoreductase;Referenceproteome	Superoxide dismutase	4	43.5	21.177	0	29.923	25.5872	25.4542	25.6243	25.277	24.7095	24.4291	24.3283	22.7999	24.8982	23.6797	23.6522	23.8363
1.23406	-1.87997	A6TAE0	pykF	alcohol catabolic process;alcohol metabolic process;carbohydrate catabolic process;carbohydrate metabolic process;catabolic process;cellular carbohydrate catabolic process;cellular carbohydrate metabolic process;cellular metabolic process;cellular process;generation of precursor metabolites and energy;glucose catabolic process;glucose metabolic process;glycolysis;hexose catabolic process;hexose m…	alkali metal ion binding;binding;catalytic activity;cation binding;ion binding;kinase activity;magnesium ion binding;metal ion binding;phosphotransferase activity, alcohol group as acceptor;potassium ion binding;pyruvate kinase activity;transferase activity;transferase activity, transferring phosphorus-containing groups		Completeproteome;Glycolysis;Kinase;Magnesium;Pyruvate;Referenceproteome;Transferase	Pyruvate kinase	8	32.3	50.688	0	96.436	25.9115	25.6862	25.4903	25.6338	25.9298	22.38	22.7783	24.1139	22.335	24.2005	22.1643	24.4289
1.51049	1.46919	A6TAI1	ihfA	biological regulation;biosynthetic process;cellular biosynthetic process;cellular macromolecule biosynthetic process;cellular macromolecule metabolic process;cellular metabolic process;cellular nitrogen compound metabolic process;cellular process;DNA metabolic process;DNA recombination;macromolecule biosynthetic process;macromolecule metabolic process;metabolic process;nitrogen compound metabolic…	binding;DNA binding;nucleic acid binding		Completeproteome;DNA-binding;DNArecombination;Referenceproteome;Transcription;Transcriptionregulation;Translationregulation	Integration host factor subunit alpha	2	11.1	11.353	0	38.601	24.3747	24.9909	25.9042	25.7367	26.2181	27.6816	26.9957	25.9878	26.6141	26.8879	26.1733	25.8018
2.64774	0.902104	A6TAK8;A6TCT3	hns;stpA	biological regulation;regulation of biological process;regulation of biosynthetic process;regulation of cellular biosynthetic process;regulation of cellular macromolecule biosynthetic process;regulation of cellular metabolic process;regulation of cellular process;regulation of gene expression;regulation of macromolecule biosynthetic process;regulation of macromolecule metabolic process;regulation…	binding;DNA binding;nucleic acid binding	cell part;intracellular	Completeproteome;DNA-binding;Referenceproteome	DNA-binding protein	10	65.2	15.286	0	323.31	26.4483	26.6136	26.9648	26.3419	27.2778	27.5436	27.7917	27.3639	29.1491	28.0326	28.5414	29.0698
1.29981	-1.38766	A6TB20	eda		catalytic activity;lyase activity		Completeproteome;Referenceproteome		5	38	22.229	0	38.376	24.6086	24.1395	24.1002	24.1877	23.6083	21.8404	22.0059	24.0308	22.4656	22.4301	24.1926	24.3754
1.56389	-1.42557	A6TB47	otsA	biosynthetic process;carbohydrate biosynthetic process;carbohydrate metabolic process;cellular biosynthetic process;cellular carbohydrate biosynthetic process;cellular carbohydrate metabolic process;cellular metabolic process;cellular process;disaccharide biosynthetic process;disaccharide metabolic process;glycoside biosynthetic process;glycoside metabolic process;metabolic process;oligosaccharid…	alpha,alpha-trehalose-phosphate synthase (UDP-forming) activity;catalytic activity;glucosyltransferase activity;transferase activity;transferase activity, transferring glycosyl groups;transferase activity, transferring hexosyl groups;UDP-glucosyltransferase activity;UDP-glycosyltransferase activity		Completeproteome;Glycosyltransferase;Referenceproteome;Transferase	Alpha,alpha-trehalose-phosphate synthase [UDP-forming]	5	18.8	53.812	0	45.267	25.444	25.1412	23.8785	23.7973	23.6441	23.4239	22.5378	22.953	23.7415	23.3799	22.7116	22.9085
1.186	-1.50358	A6TB86	KPN_02436	biosynthetic process;cellular biosynthetic process;cellular macromolecule biosynthetic process;cellular macromolecule metabolic process;cellular metabolic process;cellular nitrogen compound metabolic process;cellular process;macromolecule biosynthetic process;macromolecule metabolic process;metabolic process;nitrogen compound metabolic process;nucleic acid metabolic process;nucleobase-containing …	binding;DNA binding;nucleic acid binding;nucleic acid binding transcription factor activity;sequence-specific DNA binding transcription factor activity		Completeproteome;DNA-binding;Referenceproteome;Transcription;Transcriptionregulation		4	22.5	35.716	0	33.919	25.1221	24.8823	24.8533	24.9413	24.9388	22.2899	22.3618	24.1943	22.7775	23.6418	21.8717	22.3446
1.84047	-1.76258	A6TBC5	hisB	amine biosynthetic process;amine metabolic process;biosynthetic process;carboxylic acid biosynthetic process;carboxylic acid metabolic process;cellular amine metabolic process;cellular amino acid biosynthetic process;cellular amino acid metabolic process;cellular biosynthetic process;cellular ketone metabolic process;cellular metabolic process;cellular nitrogen compound biosynthetic process;cellu…	carbon-oxygen lyase activity;catalytic activity;histidinol-phosphatase activity;hydrolase activity;hydrolase activity, acting on ester bonds;hydro-lyase activity;imidazoleglycerol-phosphate dehydratase activity;lyase activity;phosphatase activity;phosphoric ester hydrolase activity	cell part;cytoplasm;intracellular part	Amino-acidbiosynthesis;Completeproteome;Cytoplasm;Histidinebiosynthesis;Hydrolase;Lyase;Multifunctionalenzyme;Referenceproteome	Histidine biosynthesis bifunctional protein HisB;Histidinol-phosphatase;Imidazoleglycerol-phosphate dehydratase	4	15.5	40.114	0	28.573	24.8776	25.3803	25.2799	24.7229	24.5311	22.5801	22.4324	23.6667	22.0707	22.8867	22.8027	24.1152
5.11539	-2.32736	A6TBF9	wza		carbohydrate transmembrane transporter activity;polysaccharide transmembrane transporter activity;substrate-specific transmembrane transporter activity;substrate-specific transporter activity;transmembrane transporter activity;transporter activity	cell part;membrane	Completeproteome;Referenceproteome		5	37.4	41.475	0	128	25.3426	24.8756	25.2204	25.3112	22.6833	22.8039	22.7278	23.2253	22.1628	22.9214	23.1979	22.8933
2.54014	-1.05232	A6TBG2	galF	alcohol metabolic process;biosynthetic process;carbohydrate metabolic process;cellular carbohydrate metabolic process;cellular metabolic process;cellular nitrogen compound metabolic process;cellular process;glucose metabolic process;hexose metabolic process;metabolic process;monosaccharide metabolic process;nitrogen compound metabolic process;nucleobase-containing compound metabolic process;nucle…	catalytic activity;enzyme regulator activity;nucleotidyltransferase activity;transferase activity;transferase activity, transferring phosphorus-containing groups		Completeproteome;Referenceproteome		9	54.7	32.778	0	124.41	26.1227	26.0081	25.9975	26.0895	25.4702	25.2108	24.484	24.8436	24.9722	23.334	22.8322	26.3864
1.4474	-1.72375	A6TBJ7	thiD	aromatic compound biosynthetic process;biosynthetic process;cellular aromatic compound metabolic process;cellular biosynthetic process;cellular metabolic process;cellular nitrogen compound biosynthetic process;cellular nitrogen compound metabolic process;cellular process;heterocycle biosynthetic process;heterocycle metabolic process;metabolic process;nitrogen compound metabolic process;small mole…	adenyl nucleotide binding;adenyl ribonucleotide binding;ATP binding;binding;catalytic activity;kinase activity;nucleotide binding;phosphomethylpyrimidine kinase activity;phosphotransferase activity, phosphate group as acceptor;purine nucleotide binding;purine ribonucleoside triphosphate binding;purine ribonucleotide binding;ribonucleotide binding;transferase activity;transferase activity, transfe…		ATP-binding;Completeproteome;Kinase;Nucleotide-binding;Referenceproteome;Transferase		7	47.7	28.377	0	88.655	25.4674	25.4106	24.8243	24.7345	24.3453	22.4671	22.2041	24.5253	22.1535	22.9898	23.7112	23.2738
1.94442	-1.30786	A6TBJ8	thiM	aromatic compound biosynthetic process;biosynthetic process;cellular aromatic compound metabolic process;cellular biosynthetic process;cellular metabolic process;cellular nitrogen compound biosynthetic process;cellular nitrogen compound metabolic process;cellular process;coenzyme biosynthetic process;coenzyme metabolic process;cofactor biosynthetic process;cofactor metabolic process;heterocycle b…	adenyl nucleotide binding;adenyl ribonucleotide binding;ATP binding;binding;catalytic activity;cation binding;hydroxyethylthiazole kinase activity;ion binding;kinase activity;magnesium ion binding;metal ion binding;nucleotide binding;phosphotransferase activity, alcohol group as acceptor;purine nucleotide binding;purine ribonucleoside triphosphate binding;purine ribonucleotide binding;ribonucleot…		ATP-binding;Completeproteome;Kinase;Magnesium;Metal-binding;Nucleotide-binding;Referenceproteome;Thiaminebiosynthesis;Transferase	Hydroxyethylthiazole kinase	7	53.7	26.117	0	252.12	27.917	27.8809	27.0641	27.5042	27.019	26.256	25.5321	26.3276	25.1328	22.7561	23.363	24.7244
2.23268	-1.85128	A6TBN8	folE	7,8-dihydroneopterin 3'-triphosphate biosynthetic process;aromatic compound biosynthetic process;biosynthetic process;cellular aromatic compound metabolic process;cellular biosynthetic process;cellular metabolic process;cellular nitrogen compound biosynthetic process;cellular nitrogen compound metabolic process;cellular process;coenzyme biosynthetic process;coenzyme metabolic process;cofactor bio…	binding;catalytic activity;cation binding;cyclohydrolase activity;GTP binding;GTP cyclohydrolase activity;GTP cyclohydrolase I activity;guanyl nucleotide binding;guanyl ribonucleotide binding;hydrolase activity;hydrolase activity, acting on carbon-nitrogen (but not peptide) bonds;hydrolase activity, acting on carbon-nitrogen (but not peptide) bonds, in cyclic amidines;ion binding;metal ion bindin…	cell part;cytoplasm;intracellular part	Completeproteome;GTP-binding;Hydrolase;Metal-binding;Nucleotide-binding;One-carbonmetabolism;Referenceproteome;Zinc	GTP cyclohydrolase 1	6	45.5	24.964	0	69.239	25.2385	25.1134	24.9062	24.7369	22.4172	23.1975	22.6373	24.3378	22.6011	23.9612	22.429	22.4216
3.73862	-1.14726	A6TC43	gltX	amine metabolic process;amino acid activation;carboxylic acid metabolic process;cellular amine metabolic process;cellular amino acid metabolic process;cellular ketone metabolic process;cellular macromolecule metabolic process;cellular metabolic process;cellular nitrogen compound metabolic process;cellular process;glutamyl-tRNA aminoacylation;macromolecule metabolic process;metabolic process;ncRNA…	adenyl nucleotide binding;adenyl ribonucleotide binding;aminoacyl-tRNA ligase activity;ATP binding;binding;catalytic activity;cation binding;glutamate-tRNA ligase activity;ion binding;ligase activity;ligase activity, forming aminoacyl-tRNA and related compounds;ligase activity, forming carbon-oxygen bonds;metal ion binding;nucleic acid binding;nucleotide binding;purine nucleotide binding;purine r…	cell part;cytoplasm;intracellular part	Aminoacyl-tRNAsynthetase;ATP-binding;Completeproteome;Cytoplasm;Ligase;Metal-binding;Nucleotide-binding;Proteinbiosynthesis;Referenceproteome;Zinc	Glutamate--tRNA ligase	2	5.9	53.603	0	12.713	23.9128	23.5031	23.8204	23.846	22.5253	22.7223	22.8657	22.3799	22.843	23.2488	22.8649	21.9614
1.33432	-1.10369	A6TC88	tktB		binding;catalytic activity;cation binding;ion binding;metal ion binding;transferase activity;transferase activity, transferring aldehyde or ketonic groups;transketolase activity		Calcium;Completeproteome;Magnesium;Metal-binding;Referenceproteome;Thiaminepyrophosphate;Transferase	Transketolase	7	20.5	72.169	0	73.299	24.7993	24.542	24.4288	24.4052	24.5424	22.6691	22.8442	23.7048	23.0814	22.3909	23.5063	22.52
2.18459	-1.41027	A6TCC2	guaA	amine metabolic process;biosynthetic process;carboxylic acid metabolic process;cellular amine metabolic process;cellular amino acid metabolic process;cellular biosynthetic process;cellular ketone metabolic process;cellular metabolic process;cellular nitrogen compound biosynthetic process;cellular nitrogen compound metabolic process;cellular process;glutamine family amino acid metabolic process;gl…	adenyl nucleotide binding;adenyl ribonucleotide binding;ATP binding;binding;carbon-nitrogen ligase activity, with glutamine as amido-N-donor;catalytic activity;GMP synthase (glutamine-hydrolyzing) activity;hydrolase activity;hydrolase activity, acting on acid anhydrides;hydrolase activity, acting on acid anhydrides, in phosphorus-containing anhydrides;ligase activity;ligase activity, forming carb…		ATP-binding;Completeproteome;Glutamineamidotransferase;GMPbiosynthesis;Ligase;Nucleotide-binding;Purinebiosynthesis;Referenceproteome	GMP synthase [glutamine-hydrolyzing]	12	36	58.792	0	109.17	25.7518	25.1051	24.8427	24.8251	24.3667	23.6068	23.0659	23.8442	23.5967	23.8859	22.5921	22.58
2.93899	1.2993	A6TCE4	pepB		aminopeptidase activity;binding;catalytic activity;cation binding;exopeptidase activity;hydrolase activity;ion binding;manganese ion binding;metal ion binding;metalloexopeptidase activity;metallopeptidase activity;peptidase activity;peptidase activity, acting on L-amino acid peptides;transition metal ion binding	cell part;cytoplasm;intracellular part	Aminopeptidase;Completeproteome;Cytoplasm;Hydrolase;Manganese;Metal-binding;Protease;Referenceproteome	Peptidase B	6	20.8	46.218	0	38.071	22.8387	22.3728	22.4624	22.8608	23.4643	23.8728	24.0428	24.3522	24.6358	23.7796	24.1096	23.7018
2.08039	-1.19442	A6TCG5	glyA	amine biosynthetic process;amine metabolic process;biosynthetic process;carboxylic acid biosynthetic process;carboxylic acid metabolic process;cellular amine metabolic process;cellular amino acid biosynthetic process;cellular amino acid metabolic process;cellular aromatic compound metabolic process;cellular biosynthetic process;cellular ketone metabolic process;cellular metabolic process;cellular…	binding;catalytic activity;cofactor binding;glycine hydroxymethyltransferase activity;hydroxymethyl-, formyl- and related transferase activity;pyridoxal phosphate binding;transferase activity;transferase activity, transferring one-carbon groups;vitamin B6 binding;vitamin binding	cell part;cytoplasm;intracellular part	Amino-acidbiosynthesis;Completeproteome;Cytoplasm;One-carbonmetabolism;Pyridoxalphosphate;Referenceproteome;Transferase	Serine hydroxymethyltransferase	13	48	45.439	0	246.57	27.9025	27.606	27.1315	27.3324	26.9022	26.2468	25.6422	26.4037	25.4053	26.939	26.0263	26.3879
1.87099	-2.07024	A6TCH1	purL	amine metabolic process;biosynthetic process;carboxylic acid metabolic process;cellular amine metabolic process;cellular amino acid metabolic process;cellular biosynthetic process;cellular ketone metabolic process;cellular metabolic process;cellular nitrogen compound biosynthetic process;cellular nitrogen compound metabolic process;cellular process;'de novo' IMP biosynthetic process;glutamine fam…	adenyl nucleotide binding;adenyl ribonucleotide binding;ATP binding;binding;carbon-nitrogen ligase activity, with glutamine as amido-N-donor;catalytic activity;cation binding;ion binding;ligase activity;ligase activity, forming carbon-nitrogen bonds;metal ion binding;nucleotide binding;phosphoribosylformylglycinamidine synthase activity;purine nucleotide binding;purine ribonucleoside triphosphate…	cell part;cytoplasm;intracellular part	ATP-binding;Completeproteome;Cytoplasm;Glutamineamidotransferase;Ligase;Magnesium;Metal-binding;Nucleotide-binding;Purinebiosynthesis;Referenceproteome	Phosphoribosylformylglycinamidine synthase	6	11	140.87	0	90.849	25.6325	26.015	25.2459	24.4313	24.1751	24.0495	22.3317	22.4874	22.9877	23.7593	22.7802	23.1555
2.54158	-1.06985	A6TCI1	rnc	catabolic process;cellular catabolic process;cellular macromolecule catabolic process;cellular macromolecule metabolic process;cellular metabolic process;cellular nitrogen compound metabolic process;cellular process;macromolecule catabolic process;macromolecule metabolic process;metabolic process;mRNA metabolic process;mRNA processing;ncRNA catabolic process;ncRNA metabolic process;ncRNA processi…	binding;catalytic activity;cation binding;endonuclease activity;endonuclease activity, active with either ribo- or deoxyribonucleic acids and producing 5'-phosphomonoesters;endoribonuclease activity;endoribonuclease activity, producing 5'-phosphomonoesters;hydrolase activity;hydrolase activity, acting on ester bonds;ion binding;metal ion binding;nuclease activity;nucleic acid binding;ribonuclease…	cell part;cytoplasm;intracellular part	Completeproteome;Cytoplasm;Endonuclease;Hydrolase;Magnesium;Metal-binding;mRNAprocessing;Nuclease;Referenceproteome;RNA-binding;rRNA-binding;rRNAprocessing;tRNAprocessing	Ribonuclease 3	2	16.8	25.557	0	31.633	23.9874	23.7949	24.2392	23.803	23.4198	22.6441	22.927	22.5543	23.0016	23.4435	23.0542	23.509
1.55138	-1.13923	A6TCK0;A6TI57	clpB;KPN_pKPN3p05899	macromolecule metabolic process;metabolic process;primary metabolic process;protein maturation;protein metabolic process;protein processing;response to abiotic stimulus;response to heat;response to stimulus;response to stress;response to temperature stimulus	adenyl nucleotide binding;adenyl ribonucleotide binding;ATP binding;binding;catalytic activity;hydrolase activity;nucleotide binding;peptidase activity;purine nucleotide binding;purine ribonucleoside triphosphate binding;purine ribonucleotide binding;ribonucleotide binding	cell part;cytoplasm;intracellular part	ATP-binding;Chaperone;Coiledcoil;Completeproteome;Cytoplasm;Hydrolase;Nucleotide-binding;Plasmid;Protease;Referenceproteome;Repeat;Stressresponse	Chaperone protein ClpB	8	13	95.405	0	47.417	24.3147	23.945	23.2281	23.6138	22.5411	22.2152	22.218	23.5703	22.9865	24.114	23.4981	22.9582
1.29999	-1.19334	A6TD47	cysH	amine biosynthetic process;amine metabolic process;aspartate family amino acid biosynthetic process;aspartate family amino acid metabolic process;biosynthetic process;carboxylic acid biosynthetic process;carboxylic acid metabolic process;cellular amine metabolic process;cellular amino acid biosynthetic process;cellular amino acid metabolic process;cellular biosynthetic process;cellular ketone met…	catalytic activity;oxidoreductase activity;oxidoreductase activity, acting on a sulfur group of donors;oxidoreductase activity, acting on a sulfur group of donors, disulfide as acceptor;phosphoadenylyl-sulfate reductase (thioredoxin) activity	cell part;cytoplasm;intracellular part	Completeproteome;Cytoplasm;Oxidoreductase;Referenceproteome	Phosphoadenosine phosphosulfate reductase	5	25.8	27.814	0	31.08	24.5732	24.5144	24.1144	24.4491	24.5187	22.43	23.3458	22.5833	22.7837	22.84	23.3953	21.9552
1.70799	-1.0514	A6TDT3;A6T7I9	tktA		binding;catalytic activity;cation binding;ion binding;metal ion binding;transferase activity;transferase activity, transferring aldehyde or ketonic groups;transketolase activity		Calcium;Completeproteome;Magnesium;Metal-binding;Referenceproteome;Thiaminepyrophosphate;Transferase	Transketolase	12	30.9	71.95	0	188.39	27.3877	27.6339	26.8022	27.0212	26.6411	25.8641	25.5287	26.6054	23.6497	24.7109	24.5945	24.4409
2.10575	-2.99379	A6TED7	yqjD				Completeproteome;Referenceproteome		3	39.6	11.015	0	258.16	25.8622	26.4206	26.2056	25.2595	21.6221	22.4668	22.6896	24.9943	22.5946	23.0557	25.5707	25.992
1.1539	-1.15641	A6TEI8	nusA	biological regulation;biosynthetic process;cellular biosynthetic process;cellular macromolecule metabolic process;cellular metabolic process;cellular nitrogen compound metabolic process;cellular process;cellular response to stimulus;cellular response to stress;DNA metabolic process;DNA repair;macromolecule metabolic process;metabolic process;nitrogen compound metabolic process;nucleic acid metabo…	binding;DNA binding;nucleic acid binding;nucleic acid binding transcription factor activity;nucleotide binding;RNA binding;sequence-specific DNA binding transcription factor activity;translation elongation factor activity;translation factor activity, nucleic acid binding	cell part;cytoplasm;intracellular part	Completeproteome;Cytoplasm;Elongationfactor;Proteinbiosynthesis;Referenceproteome;Repeat;RNA-binding;Transcription;Transcriptionantitermination;Transcriptionregulation;Transcriptiontermination	Transcription termination/antitermination protein NusA	6	24	54.906	0	49.059	24.4757	23.1777	21.9402	23.5066	21.9946	22.0786	22.1863	22.2151	23.2446	23.2974	22.8645	24.5023
0.943583	-1.34263	A6TEN8	rpsI	biosynthetic process;cellular biosynthetic process;cellular macromolecule biosynthetic process;cellular macromolecule metabolic process;cellular metabolic process;cellular process;cellular protein metabolic process;macromolecule biosynthetic process;macromolecule metabolic process;metabolic process;primary metabolic process;protein metabolic process;translation	structural constituent of ribosome;structural molecule activity	cell part;cytoplasmic part;intracellular non-membrane-bounded organelle;intracellular organelle;intracellular part;macromolecular complex;non-membrane-bounded organelle;organelle;ribonucleoprotein complex;ribosome	Completeproteome;Referenceproteome;Ribonucleoprotein;Ribosomalprotein	30S ribosomal protein S9	5	33.8	14.856	0	131	23.7512	24.7969	24.9123	25.1884	25.1263	23.3138	22.7731	22.0651	23.3647	23.1006	22.7428	22.8316
2.39411	-0.950947	A6TEN9	rplM	biosynthetic process;cellular biosynthetic process;cellular macromolecule biosynthetic process;cellular macromolecule metabolic process;cellular metabolic process;cellular process;cellular protein metabolic process;macromolecule biosynthetic process;macromolecule metabolic process;metabolic process;primary metabolic process;protein metabolic process;translation	structural constituent of ribosome;structural molecule activity	cell part;cytoplasmic part;intracellular non-membrane-bounded organelle;intracellular organelle;intracellular part;macromolecular complex;non-membrane-bounded organelle;organelle;ribonucleoprotein complex;ribosome	Completeproteome;Referenceproteome;Ribonucleoprotein;Ribosomalprotein	50S ribosomal protein L13	4	42.3	16.109	0	83.305	26.8112	26.3825	26.4409	26.1119	25.7972	25.6547	25.3907	25.0999	25.9031	24.0884	22.7465	25.6223
1.71814	-1.36601	A6TEQ3	mdh	acetyl-CoA catabolic process;acetyl-CoA metabolic process;carbohydrate metabolic process;carboxylic acid metabolic process;catabolic process;cellular catabolic process;cellular ketone metabolic process;cellular metabolic process;cellular process;coenzyme catabolic process;coenzyme metabolic process;cofactor catabolic process;cofactor metabolic process;dicarboxylic acid metabolic process;malate me…	catalytic activity;L-malate dehydrogenase activity;malate dehydrogenase activity;oxidoreductase activity;oxidoreductase activity, acting on CH-OH group of donors;oxidoreductase activity, acting on the CH-OH group of donors, NAD or NADP as acceptor		Completeproteome;NAD;Oxidoreductase;Referenceproteome;Tricarboxylicacidcycle	Malate dehydrogenase	4	22.8	32.426	0	85.506	25.0691	25.2383	24.4292	24.2496	24.2758	23.373	22.5313	23.342	23.2775	23.2532	23.8989	23.3487
1.50626	1.03606	A6TEX3	rpsJ	biosynthetic process;cellular biosynthetic process;cellular macromolecule biosynthetic process;cellular macromolecule metabolic process;cellular metabolic process;cellular process;cellular protein metabolic process;macromolecule biosynthetic process;macromolecule metabolic process;metabolic process;primary metabolic process;protein metabolic process;translation	binding;nucleic acid binding;RNA binding;structural constituent of ribosome;structural molecule activity;tRNA binding	cell part;cytoplasmic part;intracellular non-membrane-bounded organelle;intracellular organelle;intracellular part;macromolecular complex;non-membrane-bounded organelle;organelle;ribonucleoprotein complex;ribosome	Completeproteome;Referenceproteome;Ribonucleoprotein;Ribosomalprotein	30S ribosomal protein S10	6	49.5	11.766	0	272.73	26.1539	25.8096	26.1886	25.9945	26.2909	26.8935	28.0264	27.0801	27.3149	27.3869	27.6008	27.8139
3.31965	1.13172	A6TEY0	rpsL	biosynthetic process;cellular biosynthetic process;cellular macromolecule biosynthetic process;cellular macromolecule metabolic process;cellular metabolic process;cellular process;cellular protein metabolic process;macromolecule biosynthetic process;macromolecule metabolic process;metabolic process;primary metabolic process;protein metabolic process;translation	binding;nucleic acid binding;RNA binding;rRNA binding;structural constituent of ribosome;structural molecule activity;tRNA binding	cell part;intracellular organelle part;intracellular part;macromolecular complex;organelle part;ribonucleoprotein complex;small ribosomal subunit	Completeproteome;Methylation;Referenceproteome;Ribonucleoprotein;Ribosomalprotein;RNA-binding;rRNA-binding;tRNA-binding	30S ribosomal protein S12	3	16.9	13.751	0	20.394	24.888	25.0688	25.5793	25.1905	26.2917	26.4363	26.4215	26.104	27.6641	26.3142	26.8425	27.657
0.83924	-1.85642	A6TF13	aroB	amine biosynthetic process;amine metabolic process;aromatic amino acid family biosynthetic process;aromatic amino acid family metabolic process;aromatic compound biosynthetic process;biosynthetic process;carboxylic acid biosynthetic process;carboxylic acid metabolic process;cellular amine metabolic process;cellular amino acid biosynthetic process;cellular amino acid metabolic process;cellular aro…	3-dehydroquinate synthase activity;carbon-oxygen lyase activity;carbon-oxygen lyase activity, acting on phosphates;catalytic activity;lyase activity	cell part;cytoplasm;intracellular part	Amino-acidbiosynthesis;Aromaticaminoacidbiosynthesis;Cobalt;Completeproteome;Cytoplasm;Lyase;NAD;Referenceproteome;Zinc	3-dehydroquinate synthase	2	12.1	39.213	0	71.836	25.2223	25.2438	27.615	25.4027	24.9962	23.1045	21.8743	26.0831	23.6983	23.2965	22.4567	22.6299
1.52689	-1.22673	A6TF52	asd	amine biosynthetic process;amine metabolic process;aspartate family amino acid biosynthetic process;aspartate family amino acid metabolic process;biosynthetic process;branched chain family amino acid biosynthetic process;branched chain family amino acid metabolic process;carboxylic acid biosynthetic process;carboxylic acid metabolic process;cellular amine metabolic process;cellular amino acid bio…	aspartate-semialdehyde dehydrogenase activity;binding;catalytic activity;coenzyme binding;cofactor binding;N-acetyl-gamma-glutamyl-phosphate reductase activity;NAD binding;NADP binding;nucleotide binding;oxidoreductase activity;oxidoreductase activity, acting on the aldehyde or oxo group of donors;oxidoreductase activity, acting on the aldehyde or oxo group of donors, NAD or NADP as acceptor	cell part;cytoplasm;intracellular part	Amino-acidbiosynthesis;Completeproteome;Diaminopimelatebiosynthesis;Lysinebiosynthesis;Methioninebiosynthesis;NADP;Oxidoreductase;Referenceproteome;Threoninebiosynthesis	Aspartate-semialdehyde dehydrogenase	7	42.9	39.877	0	143.56	26.1693	26.1989	25.7274	25.6351	25.9121	24.4825	24.2188	24.2104	23.8197	23.3431	22.9398	23.3825
1.54167	-1.8433	A6TFB6	prlC		catalytic activity;endopeptidase activity;hydrolase activity;metalloendopeptidase activity;metallopeptidase activity;peptidase activity;peptidase activity, acting on L-amino acid peptides		Completeproteome;Hydrolase;Metalloprotease;Protease;Referenceproteome;Zinc		6	11.5	76.703	0	36.661	25.0107	25.2691	25.3078	24.9606	25.1757	22.4132	22.9744	22.6117	21.4754	22.0416	23.1903	23.0353
1.66126	-1.19992	A6TFH4	glyS	amine metabolic process;amino acid activation;arginyl-tRNA aminoacylation;carboxylic acid metabolic process;cellular amine metabolic process;cellular amino acid metabolic process;cellular ketone metabolic process;cellular macromolecule metabolic process;cellular metabolic process;cellular nitrogen compound metabolic process;cellular process;glycyl-tRNA aminoacylation;macromolecule metabolic proce…	adenyl nucleotide binding;adenyl ribonucleotide binding;aminoacyl-tRNA ligase activity;arginine-tRNA ligase activity;ATP binding;binding;catalytic activity;glycine-tRNA ligase activity;ligase activity;ligase activity, forming aminoacyl-tRNA and related compounds;ligase activity, forming carbon-oxygen bonds;nucleotide binding;purine nucleotide binding;purine ribonucleoside triphosphate binding;pur…	cell part;cytoplasm;intracellular part	Aminoacyl-tRNAsynthetase;ATP-binding;Completeproteome;Cytoplasm;Ligase;Nucleotide-binding;Proteinbiosynthesis;Referenceproteome	Glycine--tRNA ligase beta subunit	4	9.1	76.33	0	26.316	24.6303	25.0273	24.3422	23.7378	23.85	23.5548	22.8774	22.6556	22.0454	23.143	21.7813	22.0083
2.06237	2.23266	A6TFP8	rpoZ	biosynthetic process;cellular biosynthetic process;cellular macromolecule biosynthetic process;cellular macromolecule metabolic process;cellular metabolic process;cellular nitrogen compound metabolic process;cellular process;macromolecule biosynthetic process;macromolecule metabolic process;metabolic process;nitrogen compound metabolic process;nucleic acid metabolic process;nucleobase-containing …	binding;catalytic activity;DNA binding;DNA-directed RNA polymerase activity;nucleic acid binding;nucleotidyltransferase activity;RNA polymerase activity;transferase activity;transferase activity, transferring phosphorus-containing groups		Completeproteome;DNA-directedRNApolymerase;Nucleotidyltransferase;Referenceproteome;Transcription;Transferase	DNA-directed RNA polymerase subunit omega	3	53.8	10.236	0	41.371	21.4065	21.7049	22.1655	21.6609	22.6309	25.2516	24.4065	23.5795	24.9257	24.5443	23.6581	24.3615
0.727911	-1.54978	A6TG33	glmS	amine metabolic process;carbohydrate metabolic process;carboxylic acid metabolic process;cellular amine metabolic process;cellular amino acid metabolic process;cellular ketone metabolic process;cellular metabolic process;cellular nitrogen compound metabolic process;cellular process;glutamine family amino acid metabolic process;glutamine metabolic process;metabolic process;nitrogen compound metabo…	binding;carbohydrate binding;catalytic activity;glutamine-fructose-6-phosphate transaminase (isomerizing) activity;transaminase activity;transferase activity;transferase activity, transferring nitrogenous groups	cell part;cytoplasm;intracellular part	Aminotransferase;Completeproteome;Cytoplasm;Glutamineamidotransferase;Referenceproteome;Transferase	Glutamine--fructose-6-phosphate aminotransferase [isomerizing]	7	23.3	66.843	0	137.16	26.1104	25.7105	25.1308	25.7571	26.1215	22.1409	22.6093	25.638	23.7266	25.0908	23.3521	22.3936
2.17056	-1.37882	A6TG38	atpA	ATP biosynthetic process;ATP hydrolysis coupled proton transport;ATP metabolic process;ATP synthesis coupled proton transport;biosynthetic process;cation transport;cellular biosynthetic process;cellular metabolic process;cellular nitrogen compound biosynthetic process;cellular nitrogen compound metabolic process;cellular process;energy coupled proton transport, against electrochemical gradient;en…	active transmembrane transporter activity;adenyl nucleotide binding;adenyl ribonucleotide binding;ATP binding;ATPase activity;ATPase activity, coupled;ATPase activity, coupled to movement of substances;ATPase activity, coupled to transmembrane movement of ions;ATPase activity, coupled to transmembrane movement of substances;binding;catalytic activity;cation transmembrane transporter activity;cati…	cell part;intracellular part;macromolecular complex;membrane;membrane part;plasma membrane;protein complex;proton-transporting ATP synthase complex, catalytic core F(1);proton-transporting two-sector ATPase complex, catalytic domain	ATP-binding;ATPsynthesis;Cellinnermembrane;Cellmembrane;CF(1);Completeproteome;Hydrogeniontransport;Hydrolase;Iontransport;Membrane;Nucleotide-binding;Referenceproteome;Transport	ATP synthase subunit alpha	18	47	55.168	0	323.31	29.1364	28.5603	28.7094	28.2799	27.9209	27.1224	27.5543	26.5731	26.5241	23.7477	22.7299	25.8524
1.25519	-1.74031	A6TG73	glnA	amine biosynthetic process;amine metabolic process;biosynthetic process;carboxylic acid biosynthetic process;carboxylic acid metabolic process;cellular amine metabolic process;cellular amino acid biosynthetic process;cellular amino acid metabolic process;cellular biosynthetic process;cellular ketone metabolic process;cellular metabolic process;cellular nitrogen compound biosynthetic process;cellu…	acid-ammonia (or amide) ligase activity;adenyl nucleotide binding;adenyl ribonucleotide binding;ammonia ligase activity;ATP binding;binding;catalytic activity;glutamate-ammonia ligase activity;ligase activity;ligase activity, forming carbon-nitrogen bonds;nucleotide binding;purine nucleotide binding;purine ribonucleoside triphosphate binding;purine ribonucleotide binding;ribonucleotide binding	cell part;cytoplasm;intracellular part	ATP-binding;Completeproteome;Ligase;Nucleotide-binding;Referenceproteome	Glutamine synthetase	9	33	50.983	0	179.82	26.1079	26.2492	26.0149	25.8952	25.8733	22.7492	23.4683	25.2151	23.6405	23.821	24.115	22.4638
0.820336	-1.57304	A6TGC2	hslV	macromolecule metabolic process;metabolic process;primary metabolic process;protein metabolic process;proteolysis;proteolysis involved in cellular protein catabolic process	binding;catalytic activity;cation binding;endopeptidase activity;hydrolase activity;ion binding;metal ion binding;peptidase activity;peptidase activity, acting on L-amino acid peptides;threonine-type endopeptidase activity;threonine-type peptidase activity	cell part;cytoplasmic part;HslUV protease complex;intracellular part;macromolecular complex;proteasome core complex;protein complex	Allostericenzyme;Completeproteome;Cytoplasm;Hydrolase;Metal-binding;Protease;Referenceproteome;Sodium;Threonineprotease	ATP-dependent protease subunit HslV	2	23.3	19	0	39.064	25.4639	26.8734	26.457	26.3232	26.0871	26.3588	23.7793	22.6002	22.01	23.3505	21.889	23.384
0.908185	-1.31956	A6TGC9	metL	amine biosynthetic process;amine metabolic process;aspartate family amino acid biosynthetic process;aspartate family amino acid metabolic process;biosynthetic process;carboxylic acid biosynthetic process;carboxylic acid metabolic process;cellular amine metabolic process;cellular amino acid biosynthetic process;cellular amino acid metabolic process;cellular biosynthetic process;cellular ketone met…	amino acid kinase activity;aspartate kinase activity;binding;catalytic activity;coenzyme binding;cofactor binding;homoserine dehydrogenase activity;kinase activity;NADP binding;nucleotide binding;oxidoreductase activity;oxidoreductase activity, acting on CH-OH group of donors;oxidoreductase activity, acting on the CH-OH group of donors, NAD or NADP as acceptor;phosphotransferase activity, carboxy…		Completeproteome;Kinase;Referenceproteome;Transferase		8	18.6	88.713	0	115.08	26.196	25.9434	26.2401	25.2273	24.5343	25.663	22.6243	25.5069	22.7382	23.8403	22.6241	22.2607
1.22457	-1.18667	A6TGE0	ppc	acetyl-CoA catabolic process;acetyl-CoA metabolic process;carbon fixation;carboxylic acid metabolic process;catabolic process;cellular catabolic process;cellular ketone metabolic process;cellular metabolic process;cellular process;coenzyme catabolic process;coenzyme metabolic process;cofactor catabolic process;cofactor metabolic process;dicarboxylic acid metabolic process;metabolic process;organi…	binding;carbon-carbon lyase activity;carboxy-lyase activity;catalytic activity;cation binding;ion binding;lyase activity;magnesium ion binding;metal ion binding;phosphoenolpyruvate carboxykinase activity;phosphoenolpyruvate carboxylase activity		Carbondioxidefixation;Completeproteome;Lyase;Magnesium;Pyruvate;Referenceproteome	Phosphoenolpyruvate carboxylase	11	23	99.932	0	103.56	25.8141	25.8998	25.1388	24.7389	24.5902	24.0206	23.1117	25.1223	22.7227	23.5281	22.9744	21.7894
2.19934	-1.2413	A6TGK9	metE	amine biosynthetic process;amine metabolic process;aspartate family amino acid biosynthetic process;aspartate family amino acid metabolic process;biosynthetic process;carboxylic acid biosynthetic process;carboxylic acid metabolic process;cellular amine metabolic process;cellular amino acid biosynthetic process;cellular amino acid metabolic process;cellular biosynthetic process;cellular ketone met…	5-methyltetrahydropteroyltriglutamate-homocysteine S-methyltransferase activity;5-methyltetrahydropteroyltri-L-glutamate-dependent methyltransferase activity;binding;catalytic activity;cation binding;ion binding;metal ion binding;methyltransferase activity;S-methyltransferase activity;transferase activity;transferase activity, transferring one-carbon groups;transition metal ion binding;zinc ion b…		Amino-acidbiosynthesis;Completeproteome;Metal-binding;Methioninebiosynthesis;Methyltransferase;Referenceproteome;Repeat;Transferase;Zinc	5-methyltetrahydropteroyltriglutamate--homocysteine methyltransferase	19	46.6	84.503	0	323.31	28.3363	28.2253	28.0955	27.9065	27.4443	26.5928	26.2442	27.3171	26.208	23.9975	23.8564	27.8204
1.8281	-1.25516	A6TGQ1	thiC	aromatic compound biosynthetic process;biosynthetic process;cellular aromatic compound metabolic process;cellular biosynthetic process;cellular metabolic process;cellular nitrogen compound biosynthetic process;cellular nitrogen compound metabolic process;cellular process;coenzyme biosynthetic process;coenzyme metabolic process;cofactor biosynthetic process;cofactor metabolic process;heterocycle b…	4 iron, 4 sulfur cluster binding;binding;catalytic activity;cation binding;ion binding;iron-sulfur cluster binding;lyase activity;metal cluster binding;metal ion binding;transition metal ion binding;zinc ion binding		4Fe-4S;Completeproteome;Iron;Iron-sulfur;Lyase;Metal-binding;Referenceproteome;S-adenosyl-L-methionine;Thiaminebiosynthesis;Zinc	Phosphomethylpyrimidine synthase	10	21.4	70.784	0	59.096	25.9281	25.5563	25.5454	25.322	24.9064	23.7469	23.7091	24.9686	23.0979	23.2052	23.2086	23.5289
2.12646	-1.11187	A6TGT4	pgi	alcohol biosynthetic process;alcohol catabolic process;alcohol metabolic process;biosynthetic process;carbohydrate biosynthetic process;carbohydrate catabolic process;carbohydrate metabolic process;catabolic process;cellular biosynthetic process;cellular carbohydrate biosynthetic process;cellular carbohydrate catabolic process;cellular carbohydrate metabolic process;cellular metabolic process;cel…	catalytic activity;glucose-6-phosphate isomerase activity;intramolecular oxidoreductase activity;intramolecular oxidoreductase activity, interconverting aldoses and ketoses;isomerase activity	cell part;cytoplasm;intracellular part	Completeproteome;Cytoplasm;Gluconeogenesis;Glycolysis;Isomerase;Referenceproteome	Glucose-6-phosphate isomerase	14	40.3	61.328	0	323.31	27.3359	27.3535	26.363	27.3064	26.3971	25.909	25.7987	25.8065	23.6394	24.745	22.3941	23.4793
1.17946	2.22452	A6TGV4	yjbJ				Completeproteome;Referenceproteome		2	29.1	10.133	0	55.159	21.6304	24.1545	25.5157	25.424	25.2674	26.565	27.1943	26.5961	26.008	23.4456	25.6366	25.4437
2.4156	-1.59727	A6THD2	msrA	cellular macromolecule metabolic process;cellular metabolic process;cellular process;cellular protein metabolic process;macromolecule metabolic process;macromolecule modification;metabolic process;primary metabolic process;protein metabolic process;protein modification process;protein repair;response to chemical stimulus;response to oxidative stress;response to stimulus;response to stress	catalytic activity;oxidoreductase activity;oxidoreductase activity, acting on a sulfur group of donors;oxidoreductase activity, acting on a sulfur group of donors, disulfide as acceptor;peptide-methionine-(S)-S-oxide reductase activity		Completeproteome;Oxidoreductase;Referenceproteome	Peptide methionine sulfoxide reductase MsrA	3	28.9	25.717	0	60.678	25.1178	25.0119	24.3983	24.1406	22.6695	22.8312	23.824	22.9548	22.6601	23.4405	23.6484	23.9093
4.31409	-2.88785	A6THH2	yjgF		catalytic activity;deaminase activity		Completeproteome;Referenceproteome		2	30.5	13.589	0	19.928	25.2474	25.1325	25.7071	25.3798	21.9235	23.1311	22.5225	22.3383	22.347	23.5349	23.29	23.4048
