# Supplementary material for: Iron Limitation in Klebsiella pneumoniae Defines New Roles for Lon Protease in Homeostasis and Degradation by Quantitative Proteomics
Source: Front Microbiol. 2020 Apr 24;11:546. doi: 10.3389/fmicb.2020.00546 (PMC7194016; doi:10.3389/fmicb.2020.00546)
Supplement: TABLE S2 — Significantly different proteins in cellular proteome under replete (10 μM) vs. limited conditions. [file Table_2.XLSX]

## Sheet: Sheet1
(-)log10 p-value	Difference	Protein IDs	Gene name	GOBP name	GOMF name	GOCC name	Keywords	Protein name	Peptides	Sequence coverage [%]	Mol. weight [kDa]	Q-value	Score	LFQ intensity 13	LFQ intensity 14	LFQ intensity 15	LFQ intensity 16	LFQ intensity 17	LFQ intensity 18	LFQ intensity 19	LFQ intensity 20	LFQ intensity 21	LFQ intensity 22	LFQ intensity 23	LFQ intensity 24
1.19189	-1.43864	A6T4E2	thrA	amine biosynthetic process;amine metabolic process;aspartate family amino acid biosynthetic process;aspartate family amino acid metabolic process;biosynthetic process;carboxylic acid biosynthetic process;carboxylic acid metabolic process;cellular amine metabolic process;cellular amino acid biosynthetic process;cellular amino acid metabolic process;cellular biosynthetic process;cellular ketone met…	amine binding;amino acid binding;amino acid kinase activity;aspartate kinase activity;binding;carboxylic acid binding;catalytic activity;coenzyme binding;cofactor binding;homoserine dehydrogenase activity;kinase activity;NADP binding;nucleotide binding;oxidoreductase activity;oxidoreductase activity, acting on CH-OH group of donors;oxidoreductase activity, acting on the CH-OH group of donors, NAD…		Completeproteome;Kinase;Referenceproteome;Transferase		12	25.9	88.58	0	142.32	25.3404	25.7023	25.4511	25.5912	25.0439	24.3909	24.4469	24.7264	22.6749	23.3745	25.304	24.9769
1.17928	-2.30322	A6T4E4	thrC	amine metabolic process;carboxylic acid metabolic process;cellular amine metabolic process;cellular amino acid metabolic process;cellular ketone metabolic process;cellular metabolic process;cellular nitrogen compound metabolic process;cellular process;metabolic process;nitrogen compound metabolic process;organic acid metabolic process;oxoacid metabolic process;primary metabolic process;small mole…	binding;cofactor binding;pyridoxal phosphate binding;vitamin B6 binding;vitamin binding		Completeproteome;Referenceproteome		7	32.6	46.695	0	124.08	26.5912	25.9139	26.4164	25.5853	25.8887	23.3049	24.8233	25.5136	22.8956	22.7113	22.8625	26.8246
2.16944	-1.81974	A6T4E8;A6T7I8	talA;talB	alcohol catabolic process;alcohol metabolic process;carbohydrate catabolic process;carbohydrate metabolic process;catabolic process;cellular carbohydrate catabolic process;cellular carbohydrate metabolic process;cellular metabolic process;cellular nitrogen compound metabolic process;cellular process;coenzyme metabolic process;cofactor metabolic process;glucose catabolic process;glucose metabolic …	catalytic activity;sedoheptulose-7-phosphate:D-glyceraldehyde-3-phosphate glyceronetransferase activity;transferase activity;transferase activity, transferring aldehyde or ketonic groups	cell part;cytoplasm;intracellular part	Completeproteome;Cytoplasm;Pentoseshunt;Referenceproteome;Schiffbase;Transferase	Transaldolase	10	49.8	35.266	0	255.11	26.3527	26.1449	25.862	25.9176	25.8409	25.3754	25.1352	25.1518	24.1313	24.0749	25.4425	23.3496
0.989135	-1.26736	A6T4F4	dnaK	cellular macromolecule metabolic process;cellular metabolic process;cellular process;cellular protein metabolic process;macromolecule metabolic process;metabolic process;primary metabolic process;protein folding;protein metabolic process	adenyl nucleotide binding;adenyl ribonucleotide binding;ATP binding;binding;nucleotide binding;purine nucleotide binding;purine ribonucleoside triphosphate binding;purine ribonucleotide binding;ribonucleotide binding		ATP-binding;Chaperone;Completeproteome;Nucleotide-binding;Phosphoprotein;Referenceproteome;Stressresponse	Chaperone protein DnaK	24	62.5	69.108	0	296.1	27.1683	26.8917	26.5978	26.8851	26.3703	26.4108	26.1706	26.5895	25.2661	24.2006	25.6856	27.321
1.41398	-1.85318	A6T4H9	carA	amine biosynthetic process;amine catabolic process;amine metabolic process;arginine biosynthetic process;arginine metabolic process;biosynthetic process;carbamoyl phosphate biosynthetic process;carbamoyl phosphate metabolic process;carboxylic acid biosynthetic process;carboxylic acid catabolic process;carboxylic acid metabolic process;catabolic process;cellular amine metabolic process;cellular am…	adenyl nucleotide binding;adenyl ribonucleotide binding;ATP binding;binding;carbamoyl-phosphate synthase (glutamine-hydrolyzing) activity;carbon-nitrogen ligase activity, with glutamine as amido-N-donor;catalytic activity;ligase activity;ligase activity, forming carbon-nitrogen bonds;nucleotide binding;purine nucleotide binding;purine ribonucleoside triphosphate binding;purine ribonucleotide bind…		Amino-acidbiosynthesis;Argininebiosynthesis;ATP-binding;Completeproteome;Glutamineamidotransferase;Ligase;Nucleotide-binding;Pyrimidinebiosynthesis;Referenceproteome	Carbamoyl-phosphate synthase small chain	3	21	42.165	0	105.46	25.5919	25.4763	22.6896	25.2356	21.9035	24.6368	23.3338	21.8652	22.9698	23.1721	22.8817	22.5571
2.47425	-2.68295	A6T4I0	carB	amine biosynthetic process;amine metabolic process;arginine biosynthetic process;arginine metabolic process;biosynthetic process;carboxylic acid biosynthetic process;carboxylic acid metabolic process;cellular amine metabolic process;cellular amino acid biosynthetic process;cellular amino acid metabolic process;cellular biosynthetic process;cellular ketone metabolic process;cellular metabolic proc…	adenyl nucleotide binding;adenyl ribonucleotide binding;ATP binding;binding;carbamoyl-phosphate synthase (glutamine-hydrolyzing) activity;carbon-nitrogen ligase activity, with glutamine as amido-N-donor;catalytic activity;cation binding;ion binding;ligase activity;ligase activity, forming carbon-nitrogen bonds;metal ion binding;nucleotide binding;purine nucleotide binding;purine ribonucleoside tr…		Amino-acidbiosynthesis;Argininebiosynthesis;Completeproteome;Magnesium;Manganese;Metal-binding;Pyrimidinebiosynthesis;Referenceproteome	Carbamoyl-phosphate synthase (glutamine-hydrolyzing)	8	14.1	118	0	67.182	25.3369	25.1284	26.7011	25.3295	24.7172	23.268	22.6093	24.9647	23.8119	23.1533	21.7069	23.092
3.37324	-1.23441	A6T4K6	tbpA	establishment of localization;nitrogen compound transport;sulfur compound transport;thiamine transport;transport;vitamin transport	active transmembrane transporter activity;adenyl nucleotide binding;adenyl ribonucleotide binding;ATP binding;ATPase activity;ATPase activity, coupled;ATPase activity, coupled to movement of substances;ATPase activity, coupled to transmembrane movement of substances;binding;catalytic activity;hydrolase activity;hydrolase activity, acting on acid anhydrides;hydrolase activity, acting on acid anhyd…	cell part;external encapsulating structure part;outer membrane-bounded periplasmic space;periplasmic space	Completeproteome;Referenceproteome		6	30.6	36.091	0	38.679	24.6729	24.4535	24.2451	23.9122	24.0979	23.8226	22.2975	21.635	23.217	22.9661	23.1984	22.9646
2.35804	-1.47733	A6T4N7	ftsA	biological regulation;cell cycle;cell division;cellular process;regulation of anatomical structure morphogenesis;regulation of biological process;regulation of biological quality;regulation of cell morphogenesis;regulation of cell shape;regulation of cellular component organization;regulation of cellular process;regulation of developmental process			Cellcycle;Celldivision;Cellshape;Completeproteome;Referenceproteome	Cell division protein ftsA	4	16.7	45.313	0	34.629	24.4435	24.7465	24.8594	24.6678	23.1343	23.154	22.8259	23.1642	22.4509	22.9286	23.5226	23.9058
1.86629	-1.02454	A6T4P6	guaC	cellular metabolic process;cellular nitrogen compound metabolic process;cellular process;heterocycle metabolic process;metabolic process;nitrogen compound metabolic process;nucleobase-containing compound metabolic process;nucleobase-containing small molecule metabolic process;nucleoside phosphate metabolic process;nucleotide metabolic process;primary metabolic process;purine nucleotide metabolic …	binding;catalytic activity;cation binding;GMP reductase activity;ion binding;metal ion binding;oxidoreductase activity;oxidoreductase activity, acting on NADH or NADPH;oxidoreductase activity, acting on NADH or NADPH, nitrogenous group as acceptor		Completeproteome;Metal-binding;NADP;Oxidoreductase;Potassium;Referenceproteome	GMP reductase	7	41.8	37.278	0	67.775	24.6971	24.6285	24.3598	24.7039	24.3661	22.9988	24.2108	23.4826	24.2574	23.2871	23.7908	22.9557
3.81033	-4.34705	A6T4Q7	aceE		catalytic activity;oxidoreductase activity;oxidoreductase activity, acting on the aldehyde or oxo group of donors;oxidoreductase activity, acting on the aldehyde or oxo group of donors, disulfide as acceptor;pyruvate dehydrogenase (acetyl-transferring) activity;pyruvate dehydrogenase activity		Completeproteome;Oxidoreductase;Pyruvate;Referenceproteome;Thiaminepyrophosphate	Pyruvate dehydrogenase E1 component	26	45.5	99.433	0	323.31	28.9616	28.8706	28.4092	28.4836	28.5751	27.4301	27.4241	26.924	24.9913	24.8177	24.6771	22.8507
1.42514	-2.85644	A6T4Q8	aceF	alcohol catabolic process;alcohol metabolic process;carbohydrate catabolic process;carbohydrate metabolic process;catabolic process;cellular carbohydrate catabolic process;cellular carbohydrate metabolic process;cellular metabolic process;cellular process;generation of precursor metabolites and energy;glucose catabolic process;glucose metabolic process;glycolysis;hexose catabolic process;hexose m…	acetyltransferase activity;catalytic activity;dihydrolipoamide S-acyltransferase activity;dihydrolipoyllysine-residue acetyltransferase activity;S-acetyltransferase activity;S-acyltransferase activity;transferase activity;transferase activity, transferring acyl groups;transferase activity, transferring acyl groups other than amino-acyl groups	cell part;cytoplasmic part;intracellular part;macromolecular complex;protein complex;pyruvate dehydrogenase complex	Acyltransferase;Completeproteome;Glycolysis;Lipoyl;Referenceproteome;Transferase	Acetyltransferase component of pyruvate dehydrogenase complex	16	39.7	65.915	0	323.31	27.3103	27.2194	26.4559	26.7766	26.4939	26.2462	26.7633	27.3469	25.5029	22.0041	26.2604	22.5689
1.81918	-2.08375	A6T4Q9	lpdA	biological regulation;cell redox homeostasis;cellular homeostasis;cellular process;homeostatic process;regulation of biological process;regulation of biological quality;regulation of cellular process	binding;catalytic activity;coenzyme binding;cofactor binding;dihydrolipoyl dehydrogenase activity;flavin adenine dinucleotide binding;oxidoreductase activity;oxidoreductase activity, acting on a sulfur group of donors;oxidoreductase activity, acting on a sulfur group of donors, NAD or NADP as acceptor;oxidoreductase activity, acting on NADH or NADPH		Completeproteome;FAD;Flavoprotein;NAD;Oxidoreductase;Redox-activecenter;Referenceproteome	Dihydrolipoyl dehydrogenase	15	53.8	50.563	0	122.26	26.9517	26.7192	26.7701	26.5146	26.4252	25.8992	26.1143	25.9084	25.0857	25.8255	22.9403	24.7692
1.8726	-1.73193	A6T4R3	acnB	acetyl-CoA catabolic process;acetyl-CoA metabolic process;catabolic process;cellular catabolic process;cellular metabolic process;cellular process;coenzyme catabolic process;coenzyme metabolic process;cofactor catabolic process;cofactor metabolic process;metabolic process;tricarboxylic acid cycle	2-methylisocitrate dehydratase activity;4 iron, 4 sulfur cluster binding;aconitate hydratase activity;binding;carbon-oxygen lyase activity;catalytic activity;hydro-lyase activity;iron-sulfur cluster binding;lyase activity;metal cluster binding	cell part;cytoplasmic part;cytosol;intracellular part	4Fe-4S;Completeproteome;Iron;Iron-sulfur;Lyase;Metal-binding;Referenceproteome;Tricarboxylicacidcycle	Aconitate hydratase B	18	35.4	91.889	0	177.91	26.8858	26.8688	25.5147	25.7688	25.3867	23.8422	26.4291	25.4897	24.6345	23.8662	24.1572	25.4525
0.878479	-1.0949	A6T4S1	gcd		binding;catalytic activity;cofactor binding;oxidoreductase activity;oxidoreductase activity, acting on CH-OH group of donors;quinone binding	cell part;external encapsulating structure part;integral to membrane;intrinsic to membrane;membrane part;outer membrane-bounded periplasmic space;periplasmic space	Completeproteome;Referenceproteome		4	8.7	85.08	0	50.447	24.1381	24.5191	24.5441	25.0089	24.9134	24.6194	24.7061	25.0071	22.2767	24.1141	22.6243	24.8155
2.90431	-2.16272	A6T4W8	dapD	amine biosynthetic process;amine metabolic process;aspartate family amino acid biosynthetic process;aspartate family amino acid metabolic process;biosynthetic process;carboxylic acid biosynthetic process;carboxylic acid metabolic process;cellular amine metabolic process;cellular amino acid biosynthetic process;cellular amino acid metabolic process;cellular biosynthetic process;cellular ketone met…	2,3,4,5-tetrahydropyridine-2,6-dicarboxylate N-succinyltransferase activity;catalytic activity;N-acyltransferase activity;N-succinyltransferase activity;succinyltransferase activity;transferase activity;transferase activity, transferring acyl groups;transferase activity, transferring acyl groups other than amino-acyl groups	cell part;cytoplasm;intracellular part	Acyltransferase;Amino-acidbiosynthesis;Completeproteome;Cytoplasm;Diaminopimelatebiosynthesis;Lysinebiosynthesis;Referenceproteome;Repeat;Transferase	2,3,4,5-tetrahydropyridine-2,6-dicarboxylate N-succinyltransferase	10	69.7	29.832	0	142.75	26.2454	26.3522	25.6594	25.8156	25.634	24.4697	24.295	24.7904	24.3019	23.3713	24.5645	23.1841
2.47229	-2.17849	A6T4X2	tsf		binding;nucleic acid binding;RNA binding;translation elongation factor activity;translation factor activity, nucleic acid binding	cell part;cytoplasm;intracellular part	Completeproteome;Cytoplasm;Elongationfactor;Proteinbiosynthesis;Referenceproteome	Elongation factor Ts	10	45.2	30.45	0	131.24	27.396	27.128	27.3115	27.4698	27.2449	26.4759	27.4147	27.4842	25.9623	23.8608	25.1651	25.6029
1.50275	-0.919418	A6T4X3	pyrH	biosynthetic process;cellular biosynthetic process;cellular metabolic process;cellular nitrogen compound biosynthetic process;cellular nitrogen compound metabolic process;cellular process;CTP biosynthetic process;CTP metabolic process;'de novo' CTP biosynthetic process;heterocycle biosynthetic process;heterocycle metabolic process;metabolic process;nitrogen compound metabolic process;nucleobase-c…	adenyl nucleotide binding;adenyl ribonucleotide binding;ATP binding;binding;catalytic activity;kinase activity;nucleobase-containing compound kinase activity;nucleotide binding;nucleotide kinase activity;phosphotransferase activity, phosphate group as acceptor;purine nucleotide binding;purine ribonucleoside triphosphate binding;purine ribonucleotide binding;ribonucleotide binding;transferase acti…	cell part;cytoplasm;intracellular part	Allostericenzyme;ATP-binding;Completeproteome;Cytoplasm;Kinase;Nucleotide-binding;Pyrimidinebiosynthesis;Referenceproteome;Transferase	Uridylate kinase	4	27.8	25.955	0	38.486	24.5328	23.7547	23.47	23.7214	22.9239	23.0467	23.0864	22.7419	22.952	23.5707	22.4313	22.8472
2.61562	1.35976	A6T4Y0	hlpA			cell part;periplasmic space	Chaperone;Completeproteome;Periplasm;Referenceproteome	Chaperone protein skp	7	52	16.491	0	323.31	26.5114	26.9733	27.2278	26.8726	26.8259	27.5563	28.8519	28.7326	27.9428	27.9247	28.897	28.2595
1.84249	-1.27824	A6T4Y7	accA	biosynthetic process;carboxylic acid biosynthetic process;carboxylic acid metabolic process;cellular biosynthetic process;cellular ketone metabolic process;cellular lipid metabolic process;cellular metabolic process;cellular process;fatty acid biosynthetic process;fatty acid metabolic process;lipid biosynthetic process;lipid metabolic process;metabolic process;monocarboxylic acid metabolic proces…	acetyl-CoA carboxylase activity;adenyl nucleotide binding;adenyl ribonucleotide binding;ATP binding;binding;catalytic activity;CoA carboxylase activity;ligase activity;ligase activity, forming carbon-carbon bonds;nucleotide binding;purine nucleotide binding;purine ribonucleoside triphosphate binding;purine ribonucleotide binding;ribonucleotide binding	acetyl-CoA carboxylase complex;cell part;cytoplasmic part;intracellular part;macromolecular complex;protein complex	ATP-binding;Completeproteome;Cytoplasm;Fattyacidbiosynthesis;Fattyacidmetabolism;Ligase;Lipidbiosynthesis;Lipidmetabolism;Nucleotide-binding;Referenceproteome	Acetyl-coenzyme A carboxylase carboxyl transferase subunit alpha	3	14.1	35.311	0	60.748	24.5884	24.2804	23.7528	23.9589	23.9719	23.0467	22.5433	22.8864	22.1473	23.5939	23.209	22.5172
0.749997	-1.42004	A6T500	metQ				Completeproteome;Lipoprotein;Referenceproteome	Lipoprotein	11	62.7	29.383	0	300.94	26.0824	26.5145	26.2025	26.5479	26.5603	25.8537	25.3338	26.3553	24.9775	27.3064	24.5617	22.8214
0.688215	-1.37171	A6T580	fliY		transporter activity		Completeproteome;Referenceproteome		12	61.7	28.721	0	195.29	26.9847	27.0744	26.9469	27.2401	27.1076	26.699	26.1734	26.672	25.7986	28.2133	25.1735	23.5738
3.94608	-3.09751	A6T595	tauD		catalytic activity;dioxygenase activity;oxidoreductase activity		Completeproteome;Dioxygenase;Oxidoreductase;Referenceproteome		6	43.8	32.365	0	69.932	25.72	25.2718	25.5804	25.5834	25.3901	22.7703	22.594	24.9807	21.6696	23.3043	22.4523	22.3394
1.17856	-0.931545	A6T5D5	KPN_00354		catalytic activity;oxidoreductase activity;oxidoreductase activity, acting on paired donors, with incorporation or reduction of molecular oxygen;peroxiredoxin activity		Completeproteome;Referenceproteome		5	35.5	22.355	0	80.995	25.1526	25.0324	24.9266	25.0287	25.0228	24.6805	24.8791	25.9367	23.5455	24.8115	23.2461	24.8111
1.24766	-1.31931	A6T5H9	tig	cell cycle;cell division;cellular macromolecule metabolic process;cellular metabolic process;cellular process;cellular protein metabolic process;establishment of localization;establishment of protein localization;macromolecule metabolic process;metabolic process;primary metabolic process;protein folding;protein metabolic process;protein transport;transport	catalytic activity;cis-trans isomerase activity;isomerase activity;peptidyl-prolyl cis-trans isomerase activity	cell part;cytoplasm;intracellular part	Cellcycle;Celldivision;Chaperone;Completeproteome;Cytoplasm;Isomerase;Referenceproteome;Rotamase	Trigger factor	7	22.2	48.112	0	78.233	25.7389	25.2768	24.5048	24.7742	24.4607	22.9628	25.044	24.9676	23.7732	22.3816	24.6074	24.2554
2.29293	-2.46903	A6T5I0	clpP		catalytic activity;endopeptidase activity;hydrolase activity;peptidase activity;peptidase activity, acting on L-amino acid peptides;serine hydrolase activity;serine-type endopeptidase activity;serine-type peptidase activity	cell part;cytoplasm;intracellular part	Completeproteome;Cytoplasm;Hydrolase;Protease;Referenceproteome;Serineprotease	ATP-dependent Clp protease proteolytic subunit	4	31.4	21.692	0	61.28	26.2829	26.0255	25.291	24.3543	24.7505	23.5232	23.9276	23.4371	22.8159	24.1168	22.755	22.3899
1.59356	-2.94933	A6T5I2	lon	cellular process;cellular response to stimulus;cellular response to stress;macromolecule metabolic process;metabolic process;misfolded or incompletely synthesized protein catabolic process;primary metabolic process;protein metabolic process;proteolysis;proteolysis involved in cellular protein catabolic process;response to stimulus;response to stress	adenyl nucleotide binding;adenyl ribonucleotide binding;ATP binding;ATPase activity;ATPase activity, coupled;ATP-dependent peptidase activity;binding;catalytic activity;DNA binding;endopeptidase activity;hydrolase activity;hydrolase activity, acting on acid anhydrides;hydrolase activity, acting on acid anhydrides, in phosphorus-containing anhydrides;nucleic acid binding;nucleoside-triphosphatase …	cell part;cytoplasm;intracellular part	ATP-binding;Completeproteome;Cytoplasm;DNA-binding;Hydrolase;Nucleotide-binding;Protease;Referenceproteome;Repeat;Serineprotease;Stressresponse	Lon protease	5	11.6	87.471	0	126.48	26.4955	26.8744	26.8411	25.8151	25.8579	22.2248	22.7984	22.5412	26.038	23.6457	23.2152	21.3299
1.13777	1.89469	A6T5I3	hupB	cellular component organization;cellular component organization at cellular level;cellular component organization or biogenesis;cellular component organization or biogenesis at cellular level;cellular macromolecule metabolic process;cellular metabolic process;cellular nitrogen compound metabolic process;cellular process;chromosome condensation;chromosome organization;DNA conformation change;DNA m…	binding;DNA binding;nucleic acid binding		Completeproteome;DNA-binding;DNAcondensation;Referenceproteome		7	82.2	9.1374	0	323.31	25.2529	27.0619	28.2027	27.5951	27.7517	29.283	29.818	29.2122	30.0069	27.3076	29.6061	28.7707
1.98027	-1.05453	A6T5N6	htpG	cellular macromolecule metabolic process;cellular metabolic process;cellular process;cellular protein metabolic process;macromolecule metabolic process;metabolic process;primary metabolic process;protein folding;protein metabolic process;response to stimulus;response to stress	adenyl nucleotide binding;adenyl ribonucleotide binding;ATP binding;binding;nucleotide binding;purine nucleotide binding;purine ribonucleoside triphosphate binding;purine ribonucleotide binding;ribonucleotide binding	cell part;cytoplasm;intracellular part	ATP-binding;Chaperone;Completeproteome;Cytoplasm;Nucleotide-binding;Referenceproteome;Stressresponse	Chaperone protein HtpG	7	15.7	71.106	0	106.81	24.3145	24.1235	23.5768	23.6633	23.7519	23.1386	22.9766	22.7964	22.2543	23.2793	22.8106	23.1159
1.39018	-1.26654	A6T5R1	ppiB	cellular macromolecule metabolic process;cellular metabolic process;cellular process;cellular protein metabolic process;macromolecule metabolic process;metabolic process;primary metabolic process;protein folding;protein metabolic process	catalytic activity;cis-trans isomerase activity;isomerase activity;peptidyl-prolyl cis-trans isomerase activity		Completeproteome;Isomerase;Referenceproteome;Rotamase	Peptidyl-prolyl cis-trans isomerase	5	37.5	19.421	0	31.87	24.8425	24.8678	24.9303	24.8625	24.577	23.5767	24.2701	25.1031	23.6044	22.9185	22.9258	24.9882
3.33305	-1.79153	A6T611	KPN_00582	cellular process;establishment of localization;transmembrane transport;transport		ATP-binding cassette (ABC) transporter complex;cell part;macromolecular complex;membrane part;protein complex	Completeproteome;Referenceproteome		5	21.5	56.767	0	35.721	24.4794	24.3872	25.1726	24.5317	22.034	22.4537	22.408	23.0475	22.7189	23.3223	22.4255	22.9381
3.42695	-2.31722	A6T650	ybdH		binding;catalytic activity;cation binding;ion binding;metal ion binding;oxidoreductase activity;oxidoreductase activity, acting on CH-OH group of donors		Completeproteome;Metal-binding;Referenceproteome;Zinc		8	35.9	38.928	0	75.697	25.4069	24.7188	24.9998	24.97	25.6712	24.6955	25.5904	25.7527	23.1811	22.551	23.1443	21.9502
1.81117	-0.997149	A6T653	KPN_00624		3-dehydroquinate dehydratase activity;carbon-oxygen lyase activity;catalytic activity;hydro-lyase activity;lyase activity		Completeproteome;Referenceproteome		10	50	37.63	0	141.91	26.7356	26.4255	26.8238	26.8479	27.4657	26.0936	26.3344	25.7336	25.5456	26.4725	25.7009	25.1252
1.87573	-1.0938	A6T665	KPN_00636		binding;catalytic activity;coenzyme binding;cofactor binding;NAD binding;nucleotide binding;oxidoreductase activity;oxidoreductase activity, acting on CH-OH group of donors;oxidoreductase activity, acting on the CH-OH group of donors, NAD or NADP as acceptor		Completeproteome;Referenceproteome		6	28.7	36.876	0	78.896	23.5424	23.7318	24.049	24.0288	23.9285	23.409	21.9595	24.183	22.4862	22.8706	23.4889	22.1311
1.3764	-1.49717	A6T670	KPN_00641				Completeproteome;Referenceproteome		7	41.7	35.178	0	77.844	24.9741	25.0061	25.0645	25.3062	24.6012	25.0286	24.1897	24.3903	23.9449	25.0152	23.0546	22.3474
1.98182	0.841336	A6T671	KPN_00642		binding;catalytic activity;cation binding;ion binding;metal ion binding;molybdenum ion binding;oxidoreductase activity;transition metal ion binding		Completeproteome;Metal-binding;Referenceproteome		2	2.9	85.389	0	11.272	22.0719	22.0301	22.52	22.0998	22.428	22.4449	23.1909	21.9646	22.5006	23.3814	23.2753	22.9298
3.15602	-2.42875	A6T672	mtnD	amine biosynthetic process;amine metabolic process;amino acid salvage;aspartate family amino acid biosynthetic process;aspartate family amino acid metabolic process;biosynthetic process;carboxylic acid biosynthetic process;carboxylic acid metabolic process;cellular amine metabolic process;cellular amino acid biosynthetic process;cellular amino acid metabolic process;cellular biosynthetic process;…	acireductone dioxygenase (Ni2+-requiring) activity;acireductone dioxygenase [iron(II)-requiring] activity;binding;catalytic activity;cation binding;dioxygenase activity;ion binding;iron ion binding;metal ion binding;nickel ion binding;oxidoreductase activity;oxidoreductase activity, acting on single donors with incorporation of molecular oxygen;oxidoreductase activity, acting on single donors wit…		Amino-acidbiosynthesis;Completeproteome;Dioxygenase;Iron;Metal-binding;Methioninebiosynthesis;Nickel;Oxidoreductase;Referenceproteome	Acireductone dioxygenase	6	66.1	20.224	0	67.242	25.102	25.8599	24.8701	25.3463	26.1812	26.0765	24.488	23.9355	22.0624	22.9456	22.8491	23.6063
4.74128	-3.87872	A6T674	ybdL	biosynthetic process;metabolic process	binding;catalytic activity;cofactor binding;pyridoxal phosphate binding;transaminase activity;transferase activity;transferase activity, transferring nitrogenous groups;vitamin B6 binding;vitamin binding		Aminotransferase;Completeproteome;Referenceproteome;Transferase		6	43.8	42.826	0	130.4	27.2517	27.0387	26.8067	26.5914	26.5619	26.4328	22.7557	26.4303	22.8056	23.0088	23.8377	22.5216
2.21779	-2.26312	A6T679	ahpC	response to chemical stimulus;response to oxidative stress;response to stimulus;response to stress	catalytic activity;oxidoreductase activity;oxidoreductase activity, acting on paired donors, with incorporation or reduction of molecular oxygen;peroxiredoxin activity		Completeproteome;Referenceproteome		11	83.4	20.763	0	134.15	27.8587	27.9673	27.7249	28.0618	27.6867	26.982	27.9084	28.024	26.4839	26.4845	25.3732	24.2185
2.27124	-1.70009	A6T6A3	leuS	amine metabolic process;amino acid activation;carboxylic acid metabolic process;cellular amine metabolic process;cellular amino acid metabolic process;cellular ketone metabolic process;cellular macromolecule metabolic process;cellular metabolic process;cellular nitrogen compound metabolic process;cellular process;leucyl-tRNA aminoacylation;macromolecule metabolic process;metabolic process;ncRNA m…	adenyl nucleotide binding;adenyl ribonucleotide binding;aminoacyl-tRNA editing activity;aminoacyl-tRNA ligase activity;ATP binding;binding;carboxylic ester hydrolase activity;catalytic activity;hydrolase activity;hydrolase activity, acting on ester bonds;leucine-tRNA ligase activity;ligase activity;ligase activity, forming aminoacyl-tRNA and related compounds;ligase activity, forming carbon-oxyge…	cell part;cytoplasm;intracellular part	Aminoacyl-tRNAsynthetase;ATP-binding;Completeproteome;Cytoplasm;Ligase;Nucleotide-binding;Proteinbiosynthesis;Referenceproteome	Leucine--tRNA ligase	9	21.2	97.055	0	63.254	24.8963	24.449	24.0344	23.865	23.6733	22.8424	22.526	22.2347	22.2638	23.1967	23.1195	21.8645
1.49861	-2.55623	A6T6D3	pgm	carbohydrate metabolic process;metabolic process;primary metabolic process	binding;catalytic activity;cation binding;intramolecular transferase activity;intramolecular transferase activity, phosphotransferases;ion binding;isomerase activity;magnesium ion binding;metal ion binding;phosphoglucomutase activity		Completeproteome;Magnesium;Metal-binding;Phosphoprotein;Referenceproteome		14	42.9	58.39	0	198.83	26.9268	26.8881	26.5908	26.5367	26.4358	26.2326	25.6336	26.3799	25.054	25.9012	21.6816	24.0805
1.96947	-1.99941	A6T6E9	gltA	acetyl-CoA catabolic process;acetyl-CoA metabolic process;carbohydrate metabolic process;catabolic process;cellular carbohydrate metabolic process;cellular catabolic process;cellular metabolic process;cellular process;coenzyme catabolic process;coenzyme metabolic process;cofactor catabolic process;cofactor metabolic process;metabolic process;primary metabolic process;tricarboxylic acid cycle	catalytic activity;citrate (Si)-synthase activity;transferase activity;transferase activity, transferring acyl groups;transferase activity, transferring acyl groups, acyl groups converted into alkyl on transfer	cell part;cytoplasm;intracellular part	Completeproteome;Referenceproteome;Transferase;Tricarboxylicacidcycle	Citrate synthase	12	50.1	48.001	0	117.87	25.9832	25.8388	25.1749	24.7588	24.6301	23.6419	24.1384	24.689	22.4804	23.0598	23.5365	24.6814
2.76776	-4.08134	A6T6F2	sdhA	acetyl-CoA catabolic process;acetyl-CoA metabolic process;catabolic process;cellular catabolic process;cellular metabolic process;cellular process;coenzyme catabolic process;coenzyme metabolic process;cofactor catabolic process;cofactor metabolic process;electron transport chain;generation of precursor metabolites and energy;metabolic process;oxidation-reduction process;tricarboxylic acid cycle	binding;catalytic activity;coenzyme binding;cofactor binding;flavin adenine dinucleotide binding;oxidoreductase activity;oxidoreductase activity, acting on the CH-CH group of donors		Completeproteome;Referenceproteome		5	15.5	64.477	0	256.9	26.7379	25.4955	26.3264	28.8688	26.9738	26.0168	26.5092	26.5231	22.1244	23.2714	22.7033	23.0042
3.24478	-2.16648	A6T6F4	sucA	acetyl-CoA catabolic process;acetyl-CoA metabolic process;catabolic process;cellular catabolic process;cellular metabolic process;cellular process;coenzyme catabolic process;coenzyme metabolic process;cofactor catabolic process;cofactor metabolic process;metabolic process;tricarboxylic acid cycle	binding;catalytic activity;coenzyme binding;cofactor binding;oxidoreductase activity;oxidoreductase activity, acting on the aldehyde or oxo group of donors;oxidoreductase activity, acting on the aldehyde or oxo group of donors, disulfide as acceptor;oxoglutarate dehydrogenase (succinyl-transferring) activity;thiamine pyrophosphate binding;vitamin binding		Completeproteome;Referenceproteome		5	10.4	105.17	0	66.823	24.5145	24.4522	25.3118	24.6714	22.4161	23.32	22.6968	24.1553	21.7975	22.9382	22.7463	22.8021
1.50021	-1.44331	A6T6F6	sucC	acetyl-CoA catabolic process;acetyl-CoA metabolic process;catabolic process;cellular catabolic process;cellular metabolic process;cellular process;coenzyme catabolic process;coenzyme metabolic process;cofactor catabolic process;cofactor metabolic process;metabolic process;tricarboxylic acid cycle	acid-thiol ligase activity;adenyl nucleotide binding;adenyl ribonucleotide binding;ATP binding;binding;catalytic activity;cation binding;CoA-ligase activity;ion binding;ligase activity;ligase activity, forming carbon-sulfur bonds;magnesium ion binding;manganese ion binding;metal ion binding;nucleotide binding;purine nucleotide binding;purine ribonucleoside triphosphate binding;purine ribonucleoti…		ATP-binding;Completeproteome;Ligase;Magnesium;Manganese;Metal-binding;Nucleotide-binding;Referenceproteome;Tricarboxylicacidcycle	Succinyl-CoA ligase [ADP-forming] subunit beta	7	30.2	41.502	0	46.786	24.8138	24.7065	24.5598	24.77	25.8378	23.158	23.0539	26.0741	24.1013	22.5908	22.1894	24.1954
2.14813	-2.46316	A6T6F7	sucD		acid-thiol ligase activity;adenyl nucleotide binding;adenyl ribonucleotide binding;ATP binding;ATP citrate synthase activity;binding;catalytic activity;CoA-ligase activity;cofactor binding;ligase activity;ligase activity, forming carbon-sulfur bonds;nucleotide binding;purine nucleotide binding;purine ribonucleoside triphosphate binding;purine ribonucleotide binding;ribonucleotide binding;succinat…		ATP-binding;Completeproteome;Ligase;Nucleotide-binding;Referenceproteome	Succinyl-CoA ligase [ADP-forming] subunit alpha	7	49.1	29.808	0	172.17	25.9172	26.1694	25.8331	26.272	26.1269	26.2846	27.318	27.22	25.3925	23.1823	22.848	22.9162
3.42477	-1.9883	A6T6I3	gpmA	alcohol catabolic process;alcohol metabolic process;carbohydrate catabolic process;carbohydrate metabolic process;catabolic process;cellular carbohydrate catabolic process;cellular carbohydrate metabolic process;cellular metabolic process;cellular process;generation of precursor metabolites and energy;glucose catabolic process;glucose metabolic process;glycolysis;hexose catabolic process;hexose m…	2,3-bisphosphoglycerate-dependent phosphoglycerate mutase activity;catalytic activity;intramolecular transferase activity;intramolecular transferase activity, phosphotransferases;isomerase activity;phosphoglycerate mutase activity		Completeproteome;Glycolysis;Isomerase;Referenceproteome	2,3-bisphosphoglycerate-dependent phosphoglycerate mutase	12	67.6	28.318	0	323.31	28.4419	28.1965	27.8781	28.1604	27.7995	27.5963	26.7268	27.7301	26.7704	26.3419	26.0421	25.5693
1.97489	-2.62849	A6T6Q6	dps	biological regulation;cation homeostasis;cellular cation homeostasis;cellular chemical homeostasis;cellular component organization;cellular component organization at cellular level;cellular component organization or biogenesis;cellular component organization or biogenesis at cellular level;cellular homeostasis;cellular ion homeostasis;cellular iron ion homeostasis;cellular macromolecule metabolic…	binding;catalytic activity;cation binding;DNA binding;ferric iron binding;ion binding;iron ion binding;metal ion binding;nucleic acid binding;oxidoreductase activity;oxidoreductase activity, oxidizing metal ions;transition metal ion binding	cell part;cytoplasm;intracellular part	Completeproteome;Cytoplasm;DNA-binding;DNAcondensation;Iron;Ironstorage;Metal-binding;Oxidoreductase;Referenceproteome	DNA protection during starvation protein	7	62.9	18.708	0	47.196	25.8835	25.8874	25.7616	25.9962	25.8281	25.5845	25.767	25.5303	25.3272	23.0892	22.2064	22.392
1.35171	-1.97548	A6T6Q8	ompX			cell outer membrane;cell part;external encapsulating structure part;integral to membrane;intrinsic to membrane;membrane;membrane part;outer membrane	Completeproteome;Referenceproteome		7	57.6	18.463	0	323.31	27.5697	27.4895	27.2843	27.0729	26.8527	26.2845	25.7254	26.354	25.6714	26.9187	25.6895	23.2349
2.1894	-0.880594	A6T6S8	yliB	cellular process;establishment of localization;transmembrane transport;transport		ATP-binding cassette (ABC) transporter complex;cell part;macromolecular complex;membrane part;protein complex	Completeproteome;Referenceproteome		4	12.3	56.445	0	46.238	24.1359	24.1661	23.7534	23.8136	23.5048	23.2653	23.067	21.4134	22.5788	23.1933	23.475	23.0996
0.627605	-1.72355	A6T6Z6;A6TAU7	pflB;tdcE	carbohydrate metabolic process;metabolic process;primary metabolic process	acetyltransferase activity;C-acetyltransferase activity;C-acyltransferase activity;catalytic activity;formate C-acetyltransferase activity;transferase activity;transferase activity, transferring acyl groups;transferase activity, transferring acyl groups other than amino-acyl groups	cell part;cytoplasm;intracellular part	Completeproteome;Organicradical;Referenceproteome;Transferase		27	54.5	85.145	0	323.31	27.4256	27.3177	26.6617	27.224	26.6436	25.4351	25.7719	26.4927	24.9817	25.8752	22.2935	28.5843
4.20366	-2.51929	A6T700	serC	amine biosynthetic process;amine metabolic process;biosynthetic process;carboxylic acid biosynthetic process;carboxylic acid metabolic process;cellular amine metabolic process;cellular amino acid biosynthetic process;cellular amino acid metabolic process;cellular biosynthetic process;cellular ketone metabolic process;cellular metabolic process;cellular nitrogen compound biosynthetic process;cellu…	binding;catalytic activity;cofactor binding;O-phospho-L-serine:2-oxoglutarate aminotransferase activity;pyridoxal phosphate binding;transaminase activity;transferase activity;transferase activity, transferring nitrogenous groups;vitamin B6 binding;vitamin binding	cell part;cytoplasm;intracellular part	Amino-acidbiosynthesis;Aminotransferase;Completeproteome;Cytoplasm;Pyridoxalphosphate;Pyridoxinebiosynthesis;Referenceproteome;Serinebiosynthesis;Transferase	Phosphoserine aminotransferase	5	18.2	39.671	0	48.056	25.5338	25.4765	25.143	25.304	25.2008	24.9566	22.4967	24.816	22.1382	22.9619	23.1661	23.1138
1.85919	-1.86149	A6T720	aspC	amine metabolic process;biosynthetic process;carboxylic acid metabolic process;cellular amine metabolic process;cellular amino acid metabolic process;cellular ketone metabolic process;cellular metabolic process;cellular nitrogen compound metabolic process;cellular process;metabolic process;nitrogen compound metabolic process;organic acid metabolic process;oxoacid metabolic process;primary metabol…	binding;catalytic activity;cofactor binding;pyridoxal phosphate binding;transaminase activity;transferase activity;transferase activity, transferring nitrogenous groups;vitamin B6 binding;vitamin binding		Aminotransferase;Completeproteome;Pyridoxalphosphate;Referenceproteome;Transferase		11	40.4	43.539	0	252.19	27.0133	26.4852	25.7489	26.5207	25.4373	25.5465	24.8093	25.4014	25.0178	25.6994	23.6465	23.9585
1.64538	-1.64927	A6T726	asnS	amine metabolic process;amino acid activation;asparaginyl-tRNA aminoacylation;carboxylic acid metabolic process;cellular amine metabolic process;cellular amino acid metabolic process;cellular ketone metabolic process;cellular macromolecule metabolic process;cellular metabolic process;cellular nitrogen compound metabolic process;cellular process;macromolecule metabolic process;metabolic process;nc…	adenyl nucleotide binding;adenyl ribonucleotide binding;aminoacyl-tRNA ligase activity;asparagine-tRNA ligase activity;ATP binding;binding;catalytic activity;ligase activity;ligase activity, forming aminoacyl-tRNA and related compounds;ligase activity, forming carbon-oxygen bonds;nucleic acid binding;nucleotide binding;purine nucleotide binding;purine ribonucleoside triphosphate binding;purine ri…	cell part;cytoplasm;intracellular part	Aminoacyl-tRNAsynthetase;ATP-binding;Completeproteome;Cytoplasm;Ligase;Nucleotide-binding;Proteinbiosynthesis;Referenceproteome	Asparagine--tRNA ligase	8	26.2	52.495	0	93.517	25.7552	25.5482	25.7776	25.9395	26.0272	25.5163	25.1152	25.2589	24.9478	23.2787	23.0867	25.1102
1.5491	-1.02861	A6T792	yccJ				Completeproteome;Referenceproteome		2	52	8.5624	0	23.572	24.4485	24.1474	24.1089	24.0504	22.9865	24.2949	22.2219	22.76	24.0459	22.582	22.6354	23.3775
2.42957	-2.5429	A6T7G1	ptsG	carbohydrate transport;establishment of localization;organic substance transport;phosphoenolpyruvate-dependent sugar phosphotransferase system;transport	active transmembrane transporter activity;carbohydrate transmembrane transporter activity;catalytic activity;glucose transmembrane transporter activity;hexose transmembrane transporter activity;kinase activity;monosaccharide transmembrane transporter activity;phosphotransferase activity, alcohol group as acceptor;protein-N(PI)-phosphohistidine-sugar phosphotransferase activity;substrate-specific …	cell part;integral to membrane;intrinsic to membrane;membrane;membrane part;plasma membrane	Cellmembrane;Completeproteome;Kinase;Membrane;Phosphotransferasesystem;Referenceproteome;Sugartransport;Transferase;Transmembrane;Transmembranehelix;Transport		4	17	50.654	0	323.31	25.8175	25.5348	25.2485	25.6531	25.891	22.7625	22.3781	25.8886	24.4145	23.3134	22.3423	22.0122
1.25028	-1.35217	A6T7K6	icdA	acetyl-CoA catabolic process;acetyl-CoA metabolic process;carbohydrate metabolic process;carboxylic acid metabolic process;catabolic process;cellular aldehyde metabolic process;cellular carbohydrate metabolic process;cellular catabolic process;cellular ketone metabolic process;cellular metabolic process;cellular process;coenzyme catabolic process;coenzyme metabolic process;cofactor catabolic proc…	binding;catalytic activity;cation binding;coenzyme binding;cofactor binding;ion binding;isocitrate dehydrogenase (NADP+) activity;isocitrate dehydrogenase activity;magnesium ion binding;metal ion binding;NAD binding;nucleotide binding;oxidoreductase activity;oxidoreductase activity, acting on CH-OH group of donors;oxidoreductase activity, acting on the CH-OH group of donors, NAD or NADP as accept…		Completeproteome;Glyoxylatebypass;Manganese;Metal-binding;NADP;Oxidoreductase;Referenceproteome;Tricarboxylicacidcycle	Isocitrate dehydrogenase [NADP]	15	47.6	45.748	0	218.79	27.387	26.8656	26.6003	27.0969	27.1414	26.1669	26.4826	26.2999	26.4814	26.5305	24.2327	25.2965
1.9824	-2.19382	A6T7Q5	yeaG		catalytic activity;kinase activity;phosphotransferase activity, alcohol group as acceptor;protein kinase activity;transferase activity;transferase activity, transferring phosphorus-containing groups		Completeproteome;Referenceproteome		10	27.6	74.389	0	80.67	25.7994	25.1598	24.8891	24.7716	24.7562	23.6395	24.8732	24.307	21.8039	23.1549	22.4925	24.3933
1.15284	-0.940736	A6T7R7	ydjA		catalytic activity;oxidoreductase activity		Completeproteome;Flavoprotein;FMN;Referenceproteome		3	30.1	20.189	0	59.424	24.2164	24.2325	24.8854	24.1027	22.7041	22.3926	22.7375	21.9065	22.4822	23.1314	23.7933	24.2671
2.40318	-1.01811	A6T7S2	gdhA	amine metabolic process;carboxylic acid metabolic process;cellular amine metabolic process;cellular amino acid metabolic process;cellular ketone metabolic process;cellular metabolic process;cellular nitrogen compound metabolic process;cellular process;metabolic process;nitrogen compound metabolic process;organic acid metabolic process;oxoacid metabolic process;primary metabolic process;small mole…	catalytic activity;oxidoreductase activity;oxidoreductase activity, acting on the CH-NH2 group of donors;oxidoreductase activity, acting on the CH-NH2 group of donors, NAD or NADP as acceptor		Completeproteome;Oxidoreductase;Referenceproteome	Glutamate dehydrogenase	7	29.8	48.534	0	47.116	24.5434	24.0254	23.6704	23.726	23.66	23.4792	22.5697	22.6094	22.8031	23.1278	22.7908	23.1712
2.53349	-1.66943	A6T7W5	trpA		carbon-oxygen lyase activity;catalytic activity;hydro-lyase activity;lyase activity;tryptophan synthase activity		Amino-acidbiosynthesis;Aromaticaminoacidbiosynthesis;Completeproteome;Lyase;Referenceproteome;Tryptophanbiosynthesis	Tryptophan synthase alpha chain	6	51.3	28.543	0	82.461	25.2319	25.08	25.144	25.3364	25.1485	24.456	23.8553	23.9809	23.2039	24.4551	23.5849	22.8707
1.6263	-1.93823	A6T7Z6	fabI	biosynthetic process;carboxylic acid biosynthetic process;carboxylic acid metabolic process;cellular biosynthetic process;cellular ketone metabolic process;cellular lipid metabolic process;cellular metabolic process;cellular process;fatty acid biosynthetic process;fatty acid metabolic process;lipid biosynthetic process;lipid metabolic process;metabolic process;monocarboxylic acid metabolic proces…	catalytic activity;enoyl-[acyl-carrier-protein] reductase (NADH) activity;fatty acid synthase activity;oxidoreductase activity;oxidoreductase activity, acting on the CH-CH group of donors;oxidoreductase activity, acting on the CH-CH group of donors, NAD or NADP as acceptor;transferase activity;transferase activity, transferring acyl groups;transferase activity, transferring acyl groups other than…		Completeproteome;Fattyacidbiosynthesis;Fattyacidmetabolism;Lipidbiosynthesis;Lipidmetabolism;NAD;Oxidoreductase;Referenceproteome	Enoyl-[acyl-carrier-protein] reductase [NADH]	10	72.1	27.911	0	129.96	26.1915	26.1248	26.0775	26.1904	25.2539	25.5335	24.7629	24.9814	24.6551	25.5833	24.0735	22.5195
1.60667	-1.15886	A6T8G0	ldhA		binding;catalytic activity;coenzyme binding;cofactor binding;NAD binding;nucleotide binding;oxidoreductase activity;oxidoreductase activity, acting on CH-OH group of donors;oxidoreductase activity, acting on the CH-OH group of donors, NAD or NADP as acceptor		Completeproteome;Oxidoreductase;Referenceproteome		2	13.4	36.363	0	51.102	24.4904	24.3803	23.714	23.7307	21.8705	23.2473	23.332	23.0903	22.0433	23.6263	23.1098	22.9004
1.79803	-1.91796	A6T8M5	manA	alcohol biosynthetic process;alcohol metabolic process;biosynthetic process;carbohydrate biosynthetic process;carbohydrate metabolic process;cellular biosynthetic process;cellular carbohydrate biosynthetic process;cellular carbohydrate metabolic process;cellular metabolic process;cellular nitrogen compound metabolic process;cellular process;GDP-mannose biosynthetic process;GDP-mannose metabolic p…	binding;catalytic activity;cation binding;intramolecular oxidoreductase activity;intramolecular oxidoreductase activity, interconverting aldoses and ketoses;ion binding;isomerase activity;mannose-6-phosphate isomerase activity;metal ion binding;transition metal ion binding;zinc ion binding		Completeproteome;Isomerase;Metal-binding;Referenceproteome;Zinc	Mannose-6-phosphate isomerase	5	23	42.523	0	40.465	25.2827	24.956	24.5684	24.4994	24.6998	23.1899	24.9706	24.3803	21.9998	23.4665	21.9893	24.179
2.24537	-1.16303	A6T8M6;A6T8Q6	fumA;fumB	cellular metabolic process;cellular process;generation of precursor metabolites and energy;metabolic process	carbon-oxygen lyase activity;catalytic activity;fumarate hydratase activity;hydro-lyase activity;lyase activity		Completeproteome;Referenceproteome		4	16.2	59.906	0	88.045	23.7771	24.4155	24.252	24.6901	24.9054	23.8983	23.3964	24.355	22.5802	23.5317	23.2574	23.1132
0.879889	-1.93672	A6T8N6	pntA	cation transport;establishment of localization;hydrogen transport;ion transport;monovalent inorganic cation transport;proton transport;transport	binding;catalytic activity;NAD(P)+ transhydrogenase (AB-specific) activity;NAD(P)+ transhydrogenase activity;nucleotide binding;oxidoreductase activity;oxidoreductase activity, acting on NADH or NADPH;oxidoreductase activity, acting on NADH or NADPH, NAD or NADP as acceptor		Completeproteome;NAD;NADP;Nucleotide-binding;Oxidoreductase;Referenceproteome	NAD(P) transhydrogenase subunit alpha	10	38.7	54.686	0	323.31	28.2654	27.8081	27.7902	27.731	29.0321	27.5559	27.1868	28.1078	26.9132	26.9121	22.6652	27.3574
10.1982	-4.18208	A6T8N7	pntB		binding;catalytic activity;coenzyme binding;cofactor binding;NAD(P)+ transhydrogenase (AB-specific) activity;NAD(P)+ transhydrogenase activity;NADP binding;nucleotide binding;oxidoreductase activity;oxidoreductase activity, acting on NADH or NADPH;oxidoreductase activity, acting on NADH or NADPH, NAD or NADP as acceptor	cell part;integral to membrane;intrinsic to membrane;membrane;membrane part;plasma membrane	Cellinnermembrane;Cellmembrane;Completeproteome;Membrane;NAD;NADP;Oxidoreductase;Referenceproteome	NAD(P) transhydrogenase subunit beta	5	16.9	48.799	0	41.831	26.8761	26.7853	26.7641	26.8765	26.2104	22.894	26.3295	26.0859	22.5575	22.6696	22.6648	22.6818
1.70877	-1.10142	A6T8X5	KPN_01615	amine biosynthetic process;amine metabolic process;aspartate family amino acid biosynthetic process;aspartate family amino acid metabolic process;biosynthetic process;carboxylic acid biosynthetic process;carboxylic acid metabolic process;cellular amine metabolic process;cellular amino acid biosynthetic process;cellular amino acid metabolic process;cellular biosynthetic process;cellular ketone met…	5-methyltetrahydropteroyltriglutamate-homocysteine S-methyltransferase activity;5-methyltetrahydropteroyltri-L-glutamate-dependent methyltransferase activity;binding;catalytic activity;cation binding;ion binding;metal ion binding;methyltransferase activity;S-methyltransferase activity;transferase activity;transferase activity, transferring one-carbon groups;transition metal ion binding;zinc ion b…		Completeproteome;Referenceproteome		7	30.5	41.333	0	44.492	23.454	23.6744	24.0358	23.6013	24.1053	23.3482	24.7782	24.8912	23.0652	22.7986	21.6272	22.8687
1.67888	-0.959318	A6T914	KPN_01654				Completeproteome;Lipoprotein;Referenceproteome	Lipoprotein	6	45.5	28.826	0	70.667	24.9383	24.5794	24.5135	24.9192	24.9538	24.2708	25.6927	25.4258	23.9503	22.9334	24.0002	24.2292
2.60987	1.53252	A6T962	deoC	carbohydrate catabolic process;carbohydrate metabolic process;catabolic process;cellular catabolic process;cellular metabolic process;cellular nitrogen compound catabolic process;cellular nitrogen compound metabolic process;cellular process;deoxyribonucleotide catabolic process;deoxyribonucleotide metabolic process;deoxyribose phosphate catabolic process;deoxyribose phosphate metabolic process;me…	aldehyde-lyase activity;carbon-carbon lyase activity;catalytic activity;deoxyribose-phosphate aldolase activity;lyase activity	cell part;cytoplasm;intracellular part	Completeproteome;Cytoplasm;Lyase;Referenceproteome;Schiffbase	Deoxyribose-phosphate aldolase	9	52.2	27.313	0	153.29	26.015	25.6832	26.103	26.064	26.0189	25.5258	25.624	25.6037	28.2308	26.8529	27.2818	27.6298
0.9548	1.26365	A6T985	ygaU				Completeproteome;Referenceproteome		6	47	15.909	0	69.696	23.5367	23.9231	23.384	22.7276	23.1498	23.5651	25.0902	22.5619	25.9882	22.9906	25.0899	24.5572
4.03406	-1.91463	A6T9H4	KPN_01814		catalytic activity;transferase activity		Completeproteome;Referenceproteome;Transferase		4	26.5	26.877	0	29.359	25.5022	24.6688	24.8641	24.7922	24.5125	23.1189	23.223	25.9002	23.2329	22.9725	22.8173	23.1461
3.03954	-1.97648	A6T9J1	KPN_01831	response to chemical stimulus;response to oxidative stress;response to stimulus;response to stress	antioxidant activity;catalytic activity;oxidoreductase activity;oxidoreductase activity, acting on peroxide as acceptor;peroxidase activity		Completeproteome;Referenceproteome		4	74.8	15.093	0	66.685	24.7858	24.6038	24.8841	24.7547	25.2376	24.9611	23.3763	24.7092	21.964	22.9805	22.678	23.4999
1.06401	-1.2898	A6T9K7	maeA	carboxylic acid metabolic process;cellular ketone metabolic process;cellular metabolic process;cellular process;dicarboxylic acid metabolic process;malate metabolic process;metabolic process;organic acid metabolic process;oxoacid metabolic process;small molecule metabolic process	binding;carbon-carbon lyase activity;carboxy-lyase activity;catalytic activity;cation binding;coenzyme binding;cofactor binding;ion binding;lyase activity;malate dehydrogenase (decarboxylating) activity;malate dehydrogenase activity;malic enzyme activity;metal ion binding;NAD binding;nucleotide binding;oxaloacetate decarboxylase activity;oxidoreductase activity;oxidoreductase activity, acting on …		Completeproteome;Metal-binding;NAD;Oxidoreductase;Referenceproteome	NAD-dependent malic enzyme	2	6.9	62.771	0	32.197	24.9932	24.5949	24.1334	22.4563	21.7932	22.6059	22.4505	22.7882	23.3145	22.7662	22.9897	21.9482
2.26415	-1.89916	A6TA02	ydhD	biological regulation;cell redox homeostasis;cellular homeostasis;cellular process;homeostatic process;regulation of biological process;regulation of biological quality;regulation of cellular process	catalytic activity;disulfide oxidoreductase activity;electron carrier activity;oxidoreductase activity;oxidoreductase activity, acting on a sulfur group of donors;protein disulfide oxidoreductase activity		Completeproteome;Referenceproteome	Glutaredoxin	2	28.7	12.903	0	53.139	24.8607	25.1247	24.9682	25.487	22.7211	22.9579	22.6151	22.0982	23.4612	24.3108	22.5244	22.5475
2.51716	-1.46906	A6TA04	sodB		antioxidant activity;binding;catalytic activity;cation binding;ion binding;metal ion binding;oxidoreductase activity;oxidoreductase activity, acting on superoxide radicals as acceptor;superoxide dismutase activity		Completeproteome;Oxidoreductase;Referenceproteome	Superoxide dismutase	4	43.5	21.177	0	29.923	25.5872	25.4542	25.6243	25.277	24.7095	24.4291	24.3283	22.7999	24.8982	23.6797	23.6522	23.8363
0.770773	-1.36888	A6TA21	KPN_02014	carbon utilization	binding;carbonate dehydratase activity;carbon-oxygen lyase activity;catalytic activity;cation binding;hydro-lyase activity;ion binding;lyase activity;metal ion binding;transition metal ion binding;zinc ion binding		Completeproteome;Lyase;Referenceproteome;Zinc	Carbonic anhydrase	5	50.7	23.244	0	104.85	26.7949	27.0166	26.0983	26.2233	26.4363	26.0015	25.856	25.8438	24.9178	27.3512	25.1726	23.2159
2.14848	2.71256	A6TA68	KPN_02061	acetoin catabolic process;acetoin metabolic process;catabolic process;cellular catabolic process;cellular ketone metabolic process;cellular metabolic process;cellular process;ketone catabolic process;metabolic process;small molecule catabolic process;small molecule metabolic process	acetoin dehydrogenase activity;catalytic activity;oxidoreductase activity;oxidoreductase activity, acting on CH-OH group of donors;oxidoreductase activity, acting on the CH-OH group of donors, NAD or NADP as acceptor		Completeproteome;Referenceproteome		6	35.5	26.672	0	160.66	24.3715	23.1739	24.2204	23.418	25.0206	25.6726	24.8122	23.9921	26.1649	25.6848	25.8686	28.3157
2.12877	-2.39827	A6TAE0	pykF	alcohol catabolic process;alcohol metabolic process;carbohydrate catabolic process;carbohydrate metabolic process;catabolic process;cellular carbohydrate catabolic process;cellular carbohydrate metabolic process;cellular metabolic process;cellular process;generation of precursor metabolites and energy;glucose catabolic process;glucose metabolic process;glycolysis;hexose catabolic process;hexose m…	alkali metal ion binding;binding;catalytic activity;cation binding;ion binding;kinase activity;magnesium ion binding;metal ion binding;phosphotransferase activity, alcohol group as acceptor;potassium ion binding;pyruvate kinase activity;transferase activity;transferase activity, transferring phosphorus-containing groups		Completeproteome;Glycolysis;Kinase;Magnesium;Pyruvate;Referenceproteome;Transferase	Pyruvate kinase	8	32.3	50.688	0	96.436	25.9115	25.6862	25.4903	25.6338	25.9298	22.38	22.7783	24.1139	22.335	24.2005	22.1643	24.4289
1.32014	-1.8514	A6TAF9	KPN_02152	amine biosynthetic process;amine metabolic process;aspartate family amino acid biosynthetic process;aspartate family amino acid metabolic process;biosynthetic process;carboxylic acid biosynthetic process;carboxylic acid metabolic process;cellular amine metabolic process;cellular amino acid biosynthetic process;cellular amino acid metabolic process;cellular biosynthetic process;cellular ketone met…	5-methyltetrahydropteroyltriglutamate-homocysteine S-methyltransferase activity;5-methyltetrahydropteroyltri-L-glutamate-dependent methyltransferase activity;binding;catalytic activity;cation binding;ion binding;metal ion binding;methyltransferase activity;S-methyltransferase activity;transferase activity;transferase activity, transferring one-carbon groups;transition metal ion binding;zinc ion b…		Completeproteome;Methyltransferase;Referenceproteome;Transferase		10	35.9	38.474	0	70.951	25.7594	25.7215	25.688	25.3759	25.3597	25.3681	24.9375	25.8946	24.4861	25.538	22.456	22.6591
2.44201	-1.89487	A6TAG0	KPN_02153				Completeproteome;Referenceproteome		6	27.9	37.651	0	43.601	25.5776	25.4201	25.1966	24.82	24.75	24.1608	24.6105	24.7076	23.6159	24.2344	23.1235	22.4609
2.21685	-1.16305	A6TAG7	ppsA	alcohol biosynthetic process;alcohol metabolic process;biosynthetic process;carbohydrate biosynthetic process;carbohydrate metabolic process;carboxylic acid metabolic process;cellular biosynthetic process;cellular carbohydrate biosynthetic process;cellular carbohydrate metabolic process;cellular ketone metabolic process;cellular metabolic process;cellular process;gluconeogenesis;glucose metabolic…	adenyl nucleotide binding;adenyl ribonucleotide binding;ATP binding;binding;catalytic activity;cation binding;ion binding;kinase activity;metal ion binding;nucleotide binding;phosphotransferase activity, paired acceptors;purine nucleotide binding;purine ribonucleoside triphosphate binding;purine ribonucleotide binding;pyruvate, water dikinase activity;ribonucleotide binding;transferase activity;t…		ATP-binding;Completeproteome;Kinase;Magnesium;Metal-binding;Nucleotide-binding;Pyruvate;Referenceproteome;Transferase	Phosphoenolpyruvate synthase	7	15.5	87.09	0	78.194	24.3741	24.4692	23.4903	23.8135	23.6535	22.946	22.6793	23.6605	23.1207	22.6262	22.5784	23.1698
2.16697	-1.30085	A6TAH5	KPN_02168				Completeproteome;Lipoprotein;Referenceproteome	Lipoprotein	6	36.1	29.1	0	48.531	24.6197	24.4725	23.931	24.4088	24.3082	23.88	25.538	25.8914	22.7637	23.5979	23.4669	22.4001
1.40119	1.11766	A6TAI1	ihfA	biological regulation;biosynthetic process;cellular biosynthetic process;cellular macromolecule biosynthetic process;cellular macromolecule metabolic process;cellular metabolic process;cellular nitrogen compound metabolic process;cellular process;DNA metabolic process;DNA recombination;macromolecule biosynthetic process;macromolecule metabolic process;metabolic process;nitrogen compound metabolic…	binding;DNA binding;nucleic acid binding		Completeproteome;DNA-binding;DNArecombination;Referenceproteome;Transcription;Transcriptionregulation;Translationregulation	Integration host factor subunit alpha	2	11.1	11.353	0	38.601	24.3747	24.9909	25.9042	25.7367	26.2181	27.6816	26.9957	25.9878	26.6141	26.8879	26.1733	25.8018
4.11893	-1.95541	A6TAI2	pheT	amine metabolic process;amino acid activation;carboxylic acid metabolic process;cellular amine metabolic process;cellular amino acid metabolic process;cellular ketone metabolic process;cellular macromolecule metabolic process;cellular metabolic process;cellular nitrogen compound metabolic process;cellular process;macromolecule metabolic process;metabolic process;ncRNA metabolic process;ncRNA proc…	adenyl nucleotide binding;adenyl ribonucleotide binding;aminoacyl-tRNA ligase activity;ATP binding;binding;catalytic activity;cation binding;ion binding;ligase activity;ligase activity, forming aminoacyl-tRNA and related compounds;ligase activity, forming carbon-oxygen bonds;magnesium ion binding;metal ion binding;nucleic acid binding;nucleotide binding;phenylalanine-tRNA ligase activity;purine n…	cell part;cytoplasm;intracellular part	Aminoacyl-tRNAsynthetase;ATP-binding;Completeproteome;Cytoplasm;Ligase;Magnesium;Metal-binding;Nucleotide-binding;Proteinbiosynthesis;Referenceproteome;RNA-binding;tRNA-binding	Phenylalanine--tRNA ligase beta subunit	9	21.5	86.962	0	147.45	24.9881	24.7149	24.2954	24.9739	24.7502	24.659	22.8332	25.3018	22.6544	23.1556	22.7402	22.6005
0.821632	-2.09776	A6TAK6	adhE	alcohol metabolic process;carbon utilization;metabolic process;small molecule metabolic process	acetaldehyde dehydrogenase (acetylating) activity;alcohol dehydrogenase (NAD) activity;binding;catalytic activity;cation binding;ion binding;lyase activity;metal ion binding;oxidoreductase activity;oxidoreductase activity, acting on CH-OH group of donors;oxidoreductase activity, acting on the aldehyde or oxo group of donors;oxidoreductase activity, acting on the aldehyde or oxo group of donors, N…		Completeproteome;Lyase;Oxidoreductase;Pyruvate;Referenceproteome	Aldehyde-alcohol dehydrogenase	24	45.5	95.893	0	323.31	28.1258	27.8049	27.8576	27.9939	27.7015	27.3088	27.425	27.3909	26.5599	26.1617	22.3109	28.3586
3.43412	2.10607	A6TAK8;A6TCT3	hns;stpA	biological regulation;regulation of biological process;regulation of biosynthetic process;regulation of cellular biosynthetic process;regulation of cellular macromolecule biosynthetic process;regulation of cellular metabolic process;regulation of cellular process;regulation of gene expression;regulation of macromolecule biosynthetic process;regulation of macromolecule metabolic process;regulation…	binding;DNA binding;nucleic acid binding	cell part;intracellular	Completeproteome;DNA-binding;Referenceproteome	DNA-binding protein	10	65.2	15.286	0	323.31	26.4483	26.6136	26.9648	26.3419	27.2778	27.5436	27.7917	27.3639	29.1491	28.0326	28.5414	29.0698
1.13566	-1.26788	A6TAP3	prsA	5-phosphoribose 1-diphosphate biosynthetic process;5-phosphoribose 1-diphosphate metabolic process;alcohol biosynthetic process;alcohol metabolic process;biosynthetic process;carbohydrate biosynthetic process;carbohydrate metabolic process;cellular biosynthetic process;cellular carbohydrate biosynthetic process;cellular carbohydrate metabolic process;cellular metabolic process;cellular nitrogen c…	adenyl nucleotide binding;adenyl ribonucleotide binding;ATP binding;binding;catalytic activity;cation binding;diphosphotransferase activity;ion binding;kinase activity;magnesium ion binding;metal ion binding;nucleotide binding;purine nucleotide binding;purine ribonucleoside triphosphate binding;purine ribonucleotide binding;ribonucleotide binding;ribose phosphate diphosphokinase activity;transfer…	cell part;cytoplasm;intracellular part	ATP-binding;Completeproteome;Cytoplasm;Kinase;Magnesium;Metal-binding;Nucleotide-binding;Nucleotidebiosynthesis;Referenceproteome;Transferase	Ribose-phosphate pyrophosphokinase	8	34.3	33.951	0	53.471	24.8163	24.8482	24.2755	24.6652	24.4608	23.0934	24.3052	24.3909	22.0288	23.1939	23.5111	24.7998
1.21802	-1.887	A6TAZ5	cspC	biological regulation;biosynthetic process;cellular biosynthetic process;cellular macromolecule biosynthetic process;cellular macromolecule metabolic process;cellular metabolic process;cellular nitrogen compound metabolic process;cellular process;macromolecule biosynthetic process;macromolecule metabolic process;metabolic process;nitrogen compound metabolic process;nucleic acid metabolic process;…	binding;DNA binding;nucleic acid binding	cell part;cytoplasm;intracellular part	Activator;Completeproteome;Cytoplasm;DNA-binding;Referenceproteome;Transcription;Transcriptionregulation		4	78.3	7.4023	0	81.358	24.5422	25.0994	24.7707	25.1426	24.6004	24.2004	25.6357	24.9643	20.709	24.0132	24.2281	23.0566
1.14938	-0.959185	A6TB24	pykA	alcohol catabolic process;alcohol metabolic process;carbohydrate catabolic process;carbohydrate metabolic process;catabolic process;cellular carbohydrate catabolic process;cellular carbohydrate metabolic process;cellular metabolic process;cellular process;generation of precursor metabolites and energy;glucose catabolic process;glucose metabolic process;glycolysis;hexose catabolic process;hexose m…	alkali metal ion binding;binding;catalytic activity;cation binding;ion binding;kinase activity;magnesium ion binding;metal ion binding;phosphotransferase activity, alcohol group as acceptor;potassium ion binding;pyruvate kinase activity;transferase activity;transferase activity, transferring phosphorus-containing groups		Completeproteome;Glycolysis;Kinase;Magnesium;Pyruvate;Referenceproteome;Transferase	Pyruvate kinase	5	16	51.422	0	34.02	23.69	23.8087	23.9624	23.8775	23.7268	22.0355	24.5411	23.9768	22.845	23.3474	23.6389	21.6705
3.2859	-2.70842	A6TB35	aspS	amine metabolic process;amino acid activation;carboxylic acid metabolic process;cellular amine metabolic process;cellular amino acid metabolic process;cellular ketone metabolic process;cellular macromolecule metabolic process;cellular metabolic process;cellular nitrogen compound metabolic process;cellular process;macromolecule metabolic process;metabolic process;ncRNA metabolic process;nitrogen c…	adenyl nucleotide binding;adenyl ribonucleotide binding;aminoacyl-tRNA ligase activity;aspartate-tRNA ligase activity;ATP binding;binding;catalytic activity;ligase activity;ligase activity, forming aminoacyl-tRNA and related compounds;ligase activity, forming carbon-oxygen bonds;nucleic acid binding;nucleotide binding;purine nucleotide binding;purine ribonucleoside triphosphate binding;purine rib…	cell part;cytoplasm;intracellular part	Aminoacyl-tRNAsynthetase;ATP-binding;Completeproteome;Cytoplasm;Ligase;Nucleotide-binding;Proteinbiosynthesis;Referenceproteome	Aspartate--tRNA ligase	6	18	66.414	0	164.78	25.4152	25.4281	25.3083	25.3709	25.4559	24.7799	25.7163	25.6557	21.7584	23.7118	22.6453	22.5732
1.53471	-1.37989	A6TB47	otsA	biosynthetic process;carbohydrate biosynthetic process;carbohydrate metabolic process;cellular biosynthetic process;cellular carbohydrate biosynthetic process;cellular carbohydrate metabolic process;cellular metabolic process;cellular process;disaccharide biosynthetic process;disaccharide metabolic process;glycoside biosynthetic process;glycoside metabolic process;metabolic process;oligosaccharid…	alpha,alpha-trehalose-phosphate synthase (UDP-forming) activity;catalytic activity;glucosyltransferase activity;transferase activity;transferase activity, transferring glycosyl groups;transferase activity, transferring hexosyl groups;UDP-glucosyltransferase activity;UDP-glycosyltransferase activity		Completeproteome;Glycosyltransferase;Referenceproteome;Transferase	Alpha,alpha-trehalose-phosphate synthase [UDP-forming]	5	18.8	53.812	0	45.267	25.444	25.1412	23.8785	23.7973	23.6441	23.4239	22.5378	22.953	23.7415	23.3799	22.7116	22.9085
4.47289	1.14279	A6TB70	fliY		transporter activity		Completeproteome;Referenceproteome		7	38	28.941	0	47.38	24.4981	24.8203	24.7244	24.7397	24.8146	25.0291	24.4617	24.6662	25.966	25.7439	25.9745	25.6693
3.02031	-2.29086	A6TB86	KPN_02436	biosynthetic process;cellular biosynthetic process;cellular macromolecule biosynthetic process;cellular macromolecule metabolic process;cellular metabolic process;cellular nitrogen compound metabolic process;cellular process;macromolecule biosynthetic process;macromolecule metabolic process;metabolic process;nitrogen compound metabolic process;nucleic acid metabolic process;nucleobase-containing …	binding;DNA binding;nucleic acid binding;nucleic acid binding transcription factor activity;sequence-specific DNA binding transcription factor activity		Completeproteome;DNA-binding;Referenceproteome;Transcription;Transcriptionregulation		4	22.5	35.716	0	33.919	25.1221	24.8823	24.8533	24.9413	24.9388	22.2899	22.3618	24.1943	22.7775	23.6418	21.8717	22.3446
2.44939	-2.09632	A6TBC5	hisB	amine biosynthetic process;amine metabolic process;biosynthetic process;carboxylic acid biosynthetic process;carboxylic acid metabolic process;cellular amine metabolic process;cellular amino acid biosynthetic process;cellular amino acid metabolic process;cellular biosynthetic process;cellular ketone metabolic process;cellular metabolic process;cellular nitrogen compound biosynthetic process;cellu…	carbon-oxygen lyase activity;catalytic activity;histidinol-phosphatase activity;hydrolase activity;hydrolase activity, acting on ester bonds;hydro-lyase activity;imidazoleglycerol-phosphate dehydratase activity;lyase activity;phosphatase activity;phosphoric ester hydrolase activity	cell part;cytoplasm;intracellular part	Amino-acidbiosynthesis;Completeproteome;Cytoplasm;Histidinebiosynthesis;Hydrolase;Lyase;Multifunctionalenzyme;Referenceproteome	Histidine biosynthesis bifunctional protein HisB;Histidinol-phosphatase;Imidazoleglycerol-phosphate dehydratase	4	15.5	40.114	0	28.573	24.8776	25.3803	25.2799	24.7229	24.5311	22.5801	22.4324	23.6667	22.0707	22.8867	22.8027	24.1152
3.56279	-1.63011	A6TBE0	ugd	biosynthetic process;carbohydrate biosynthetic process;carbohydrate metabolic process;macromolecule biosynthetic process;macromolecule metabolic process;metabolic process;polysaccharide biosynthetic process;polysaccharide metabolic process;primary metabolic process	binding;catalytic activity;coenzyme binding;cofactor binding;NAD binding;nucleotide binding;oxidoreductase activity;oxidoreductase activity, acting on CH-OH group of donors;oxidoreductase activity, acting on the CH-OH group of donors, NAD or NADP as acceptor;UDP-glucose 6-dehydrogenase activity		Completeproteome;Referenceproteome		7	33.2	43.535	0	50.541	24.0992	24.6246	24.3019	24.8167	25.1904	22.7227	24.5014	21.988	22.4832	23.1757	22.8834	22.7797
2.114	-1.12055	A6TBE6	gnd	alcohol catabolic process;alcohol metabolic process;aldonic acid metabolic process;carbohydrate catabolic process;carbohydrate metabolic process;carboxylic acid metabolic process;catabolic process;cellular carbohydrate catabolic process;cellular carbohydrate metabolic process;cellular ketone metabolic process;cellular metabolic process;cellular nitrogen compound metabolic process;cellular process…	binding;catalytic activity;coenzyme binding;cofactor binding;NADP binding;nucleotide binding;oxidoreductase activity;oxidoreductase activity, acting on CH-OH group of donors;oxidoreductase activity, acting on the CH-OH group of donors, NAD or NADP as acceptor;phosphogluconate dehydrogenase (decarboxylating) activity		Completeproteome;Gluconateutilization;NADP;Oxidoreductase;Pentoseshunt;Referenceproteome	6-phosphogluconate dehydrogenase, decarboxylating	19	54.1	51.481	0	288.29	28.2349	27.9169	27.7425	27.7681	27.6506	27.5184	27.4209	27.5748	27.0913	27.0338	26.0114	27.0436
4.17098	-2.39358	A6TBF9	wza		carbohydrate transmembrane transporter activity;polysaccharide transmembrane transporter activity;substrate-specific transmembrane transporter activity;substrate-specific transporter activity;transmembrane transporter activity;transporter activity	cell part;membrane	Completeproteome;Referenceproteome		5	37.4	41.475	0	128	25.3426	24.8756	25.2204	25.3112	22.6833	22.8039	22.7278	23.2253	22.1628	22.9214	23.1979	22.8933
1.07341	-1.67327	A6TBG2	galF	alcohol metabolic process;biosynthetic process;carbohydrate metabolic process;cellular carbohydrate metabolic process;cellular metabolic process;cellular nitrogen compound metabolic process;cellular process;glucose metabolic process;hexose metabolic process;metabolic process;monosaccharide metabolic process;nitrogen compound metabolic process;nucleobase-containing compound metabolic process;nucle…	catalytic activity;enzyme regulator activity;nucleotidyltransferase activity;transferase activity;transferase activity, transferring phosphorus-containing groups		Completeproteome;Referenceproteome		9	54.7	32.778	0	124.41	26.1227	26.0081	25.9975	26.0895	25.4702	25.2108	24.484	24.8436	24.9722	23.334	22.8322	26.3864
2.80515	-2.07711	A6TBJ7	thiD	aromatic compound biosynthetic process;biosynthetic process;cellular aromatic compound metabolic process;cellular biosynthetic process;cellular metabolic process;cellular nitrogen compound biosynthetic process;cellular nitrogen compound metabolic process;cellular process;heterocycle biosynthetic process;heterocycle metabolic process;metabolic process;nitrogen compound metabolic process;small mole…	adenyl nucleotide binding;adenyl ribonucleotide binding;ATP binding;binding;catalytic activity;kinase activity;nucleotide binding;phosphomethylpyrimidine kinase activity;phosphotransferase activity, phosphate group as acceptor;purine nucleotide binding;purine ribonucleoside triphosphate binding;purine ribonucleotide binding;ribonucleotide binding;transferase activity;transferase activity, transfe…		ATP-binding;Completeproteome;Kinase;Nucleotide-binding;Referenceproteome;Transferase		7	47.7	28.377	0	88.655	25.4674	25.4106	24.8243	24.7345	24.3453	22.4671	22.2041	24.5253	22.1535	22.9898	23.7112	23.2738
3.03641	-3.59746	A6TBJ8	thiM	aromatic compound biosynthetic process;biosynthetic process;cellular aromatic compound metabolic process;cellular biosynthetic process;cellular metabolic process;cellular nitrogen compound biosynthetic process;cellular nitrogen compound metabolic process;cellular process;coenzyme biosynthetic process;coenzyme metabolic process;cofactor biosynthetic process;cofactor metabolic process;heterocycle b…	adenyl nucleotide binding;adenyl ribonucleotide binding;ATP binding;binding;catalytic activity;cation binding;hydroxyethylthiazole kinase activity;ion binding;kinase activity;magnesium ion binding;metal ion binding;nucleotide binding;phosphotransferase activity, alcohol group as acceptor;purine nucleotide binding;purine ribonucleoside triphosphate binding;purine ribonucleotide binding;ribonucleot…		ATP-binding;Completeproteome;Kinase;Magnesium;Metal-binding;Nucleotide-binding;Referenceproteome;Thiaminebiosynthesis;Transferase	Hydroxyethylthiazole kinase	7	53.7	26.117	0	252.12	27.917	27.8809	27.0641	27.5042	27.019	26.256	25.5321	26.3276	25.1328	22.7561	23.363	24.7244
2.83239	-2.1455	A6TBN8	folE	7,8-dihydroneopterin 3'-triphosphate biosynthetic process;aromatic compound biosynthetic process;biosynthetic process;cellular aromatic compound metabolic process;cellular biosynthetic process;cellular metabolic process;cellular nitrogen compound biosynthetic process;cellular nitrogen compound metabolic process;cellular process;coenzyme biosynthetic process;coenzyme metabolic process;cofactor bio…	binding;catalytic activity;cation binding;cyclohydrolase activity;GTP binding;GTP cyclohydrolase activity;GTP cyclohydrolase I activity;guanyl nucleotide binding;guanyl ribonucleotide binding;hydrolase activity;hydrolase activity, acting on carbon-nitrogen (but not peptide) bonds;hydrolase activity, acting on carbon-nitrogen (but not peptide) bonds, in cyclic amidines;ion binding;metal ion bindin…	cell part;cytoplasm;intracellular part	Completeproteome;GTP-binding;Hydrolase;Metal-binding;Nucleotide-binding;One-carbonmetabolism;Referenceproteome;Zinc	GTP cyclohydrolase 1	6	45.5	24.964	0	69.239	25.2385	25.1134	24.9062	24.7369	22.4172	23.1975	22.6373	24.3378	22.6011	23.9612	22.429	22.4216
1.73744	-1.52929	A6TBT2;A6TB82	KPN_02430;ompC	establishment of localization;ion transport;transport	channel activity;passive transmembrane transporter activity;porin activity;transmembrane transporter activity;transporter activity;wide pore channel activity	cell outer membrane;cell part;external encapsulating structure part;macromolecular complex;membrane;membrane part;outer membrane;pore complex;protein complex	Celloutermembrane;Completeproteome;Iontransport;Membrane;Porin;Referenceproteome;Transmembrane;Transport		14	58.6	40.095	0	323.31	30.4239	30.3328	30.1386	30.4715	30.125	29.7168	30.0072	30.2476	29.1953	29.4546	29.1857	27.4139
0.699444	-1.24331	A6TBY3	ackA	acetyl-CoA biosynthetic process;acetyl-CoA metabolic process;biosynthetic process;cellular biosynthetic process;cellular metabolic process;cellular process;coenzyme biosynthetic process;coenzyme metabolic process;cofactor biosynthetic process;cofactor metabolic process;metabolic process;organic acid metabolic process;small molecule metabolic process	acetate kinase activity;adenyl nucleotide binding;adenyl ribonucleotide binding;ATP binding;binding;catalytic activity;cation binding;ion binding;kinase activity;magnesium ion binding;metal ion binding;nucleotide binding;phosphotransferase activity, carboxyl group as acceptor;purine nucleotide binding;purine ribonucleoside triphosphate binding;purine ribonucleotide binding;ribonucleotide binding;…	cell part;cytoplasm;intracellular part	ATP-binding;Completeproteome;Cytoplasm;Kinase;Magnesium;Metal-binding;Nucleotide-binding;Referenceproteome;Transferase	Acetate kinase	9	45.5	43.274	0	78.403	25.1777	25.0886	24.9792	25.2883	24.2156	25.2712	24.0845	25.8594	22.4021	23.1125	23.6998	26.3461
3.97708	0.961857	A6TC02	accD	biosynthetic process;carboxylic acid biosynthetic process;carboxylic acid metabolic process;cellular biosynthetic process;cellular ketone metabolic process;cellular lipid metabolic process;cellular metabolic process;cellular process;fatty acid biosynthetic process;fatty acid metabolic process;lipid biosynthetic process;lipid metabolic process;metabolic process;monocarboxylic acid metabolic proces…	acetyl-CoA carboxylase activity;adenyl nucleotide binding;adenyl ribonucleotide binding;ATP binding;binding;catalytic activity;cation binding;CoA carboxylase activity;ion binding;ligase activity;ligase activity, forming carbon-carbon bonds;metal ion binding;nucleotide binding;purine nucleotide binding;purine ribonucleoside triphosphate binding;purine ribonucleotide binding;ribonucleotide binding;…	acetyl-CoA carboxylase complex;cell part;cytoplasmic part;intracellular part;macromolecular complex;protein complex	ATP-binding;Completeproteome;Cytoplasm;Fattyacidbiosynthesis;Fattyacidmetabolism;Ligase;Lipidbiosynthesis;Lipidmetabolism;Metal-binding;Nucleotide-binding;Referenceproteome;Zinc;Zinc-finger	Acetyl-coenzyme A carboxylase carboxyl transferase subunit beta	2	14.1	33.436	0	13.666	22.2599	22.1678	22.1995	22.3614	22.3492	22.5528	23.0144	21.9084	23.0454	23.0551	23.2827	23.4528
1.95637	-1.04107	A6TC43	gltX	amine metabolic process;amino acid activation;carboxylic acid metabolic process;cellular amine metabolic process;cellular amino acid metabolic process;cellular ketone metabolic process;cellular macromolecule metabolic process;cellular metabolic process;cellular nitrogen compound metabolic process;cellular process;glutamyl-tRNA aminoacylation;macromolecule metabolic process;metabolic process;ncRNA…	adenyl nucleotide binding;adenyl ribonucleotide binding;aminoacyl-tRNA ligase activity;ATP binding;binding;catalytic activity;cation binding;glutamate-tRNA ligase activity;ion binding;ligase activity;ligase activity, forming aminoacyl-tRNA and related compounds;ligase activity, forming carbon-oxygen bonds;metal ion binding;nucleic acid binding;nucleotide binding;purine nucleotide binding;purine r…	cell part;cytoplasm;intracellular part	Aminoacyl-tRNAsynthetase;ATP-binding;Completeproteome;Cytoplasm;Ligase;Metal-binding;Nucleotide-binding;Proteinbiosynthesis;Referenceproteome;Zinc	Glutamate--tRNA ligase	2	5.9	53.603	0	12.713	23.9128	23.5031	23.8204	23.846	22.5253	22.7223	22.8657	22.3799	22.843	23.2488	22.8649	21.9614
2.05324	-1.13459	A6TC50	cysK	amine biosynthetic process;amine metabolic process;biosynthetic process;carboxylic acid biosynthetic process;carboxylic acid metabolic process;cellular amine metabolic process;cellular amino acid biosynthetic process;cellular amino acid metabolic process;cellular biosynthetic process;cellular ketone metabolic process;cellular metabolic process;cellular nitrogen compound biosynthetic process;cellu…	carbon-oxygen lyase activity;catalytic activity;cysteine synthase activity;hydrolase activity;lyase activity;transferase activity		Amino-acidbiosynthesis;Completeproteome;Cysteinebiosynthesis;Hydrolase;Pyridoxalphosphate;Referenceproteome;Transferase	Cysteine synthase	16	74	34.557	0	323.31	29.7489	29.5691	29.3078	29.6213	29.475	29.0467	28.9471	29.4615	28.6014	28.8023	28.7174	27.5876
3.69456	-1.66149	A6TC51	ptsH	carbohydrate transport;establishment of localization;organic substance transport;phosphoenolpyruvate-dependent sugar phosphotransferase system;transport	catalytic activity;kinase activity;phosphotransferase activity, alcohol group as acceptor;protein kinase activity;protein serine/threonine kinase activity;transferase activity;transferase activity, transferring phosphorus-containing groups	cell part;cytoplasm;intracellular part	Completeproteome;Cytoplasm;Kinase;Phosphotransferasesystem;Referenceproteome;Serine/threonine-proteinkinase;Transferase		4	70.6	9.1193	0	46.85	24.3701	24.1602	24.3772	24.8798	24.1849	22.8801	25.972	24.83	22.6528	23.1967	22.5745	22.7174
1.65346	-2.76774	A6TC52	ptsI	carbohydrate transport;establishment of localization;organic substance transport;phosphoenolpyruvate-dependent sugar phosphotransferase system;transport	binding;catalytic activity;cation binding;ion binding;kinase activity;metal ion binding;phosphoenolpyruvate-protein phosphotransferase activity;phosphotransferase activity, nitrogenous group as acceptor;transferase activity;transferase activity, transferring phosphorus-containing groups	cell part;cytoplasm;intracellular part	Completeproteome;Cytoplasm;Kinase;Magnesium;Metal-binding;Phosphotransferasesystem;Referenceproteome;Sugartransport;Transferase;Transport	Phosphoenolpyruvate-protein phosphotransferase	16	47.3	63.253	0	220.24	26.9113	26.909	26.5965	26.7858	26.2715	26.3868	25.3463	25.7133	24.722	25.9216	23.8356	21.6524
2.59833	-0.946332	A6TC53	crr	carbohydrate transport;establishment of localization;organic substance transport;phosphoenolpyruvate-dependent sugar phosphotransferase system;transport	catalytic activity;kinase activity;transferase activity;transferase activity, transferring phosphorus-containing groups		Completeproteome;Kinase;Phosphotransferasesystem;Referenceproteome;Sugartransport;Transferase;Transport		5	62.1	18.247	0	115.56	25.9273	25.9454	25.8732	25.6028	25.9795	26.2475	25.7595	25.3494	25.1622	24.7284	24.481	25.1918
1.35864	-2.0452	A6TC62	cysP		active transmembrane transporter activity;anion transmembrane transporter activity;anion transmembrane-transporting ATPase activity;ATPase activity;ATPase activity, coupled;ATPase activity, coupled to movement of substances;ATPase activity, coupled to transmembrane movement of ions;ATPase activity, coupled to transmembrane movement of substances;catalytic activity;hydrolase activity;hydrolase act…	cell part;external encapsulating structure part;outer membrane-bounded periplasmic space;periplasmic space	Completeproteome;Referenceproteome		10	38.2	37.584	0	77.555	26.6938	26.1131	25.7931	26.1349	26.2739	25.5442	24.8329	26.3565	24.5472	26.1362	22.5635	23.3071
2.68212	-1.35977	A6TC87	talA	alcohol catabolic process;alcohol metabolic process;carbohydrate catabolic process;carbohydrate metabolic process;catabolic process;cellular carbohydrate catabolic process;cellular carbohydrate metabolic process;cellular metabolic process;cellular nitrogen compound metabolic process;cellular process;coenzyme metabolic process;cofactor metabolic process;glucose catabolic process;glucose metabolic …	catalytic activity;sedoheptulose-7-phosphate:D-glyceraldehyde-3-phosphate glyceronetransferase activity;transferase activity;transferase activity, transferring aldehyde or ketonic groups	cell part;cytoplasm;intracellular part	Completeproteome;Cytoplasm;Pentoseshunt;Referenceproteome;Schiffbase;Transferase	Transaldolase	4	20.8	35.455	0	41.137	24.4086	24.2676	24.2161	24.1977	23.9684	22.4519	22.002	24.1633	22.247	23.0137	22.8864	23.5038
3.05245	-1.66914	A6TC88	tktB		binding;catalytic activity;cation binding;ion binding;metal ion binding;transferase activity;transferase activity, transferring aldehyde or ketonic groups;transketolase activity		Calcium;Completeproteome;Magnesium;Metal-binding;Referenceproteome;Thiaminepyrophosphate;Transferase	Transketolase	7	20.5	72.169	0	73.299	24.7993	24.542	24.4288	24.4052	24.5424	22.6691	22.8442	23.7048	23.0814	22.3909	23.5063	22.52
5.7002	-1.76513	A6TCB0	upp	biosynthetic process;cellular aromatic compound metabolic process;cellular biosynthetic process;cellular metabolic compound salvage;cellular metabolic process;cellular nitrogen compound biosynthetic process;cellular nitrogen compound metabolic process;cellular process;heterocycle biosynthetic process;heterocycle metabolic process;metabolic process;nitrogen compound metabolic process;nucleobase me…	binding;catalytic activity;cation binding;GTP binding;guanyl nucleotide binding;guanyl ribonucleotide binding;ion binding;magnesium ion binding;metal ion binding;nucleotide binding;purine nucleotide binding;purine ribonucleoside triphosphate binding;purine ribonucleotide binding;ribonucleotide binding;transferase activity;transferase activity, transferring glycosyl groups;transferase activity, tr…		Allostericenzyme;Completeproteome;Glycosyltransferase;GTP-binding;Magnesium;Nucleotide-binding;Referenceproteome;Transferase	Uracil phosphoribosyltransferase	4	37.5	22.565	0	67.632	25.1206	25.1726	25.021	25.0369	26.0073	23.8962	23.3128	23.9242	23.4959	23.4583	23.2229	23.1134
2.48059	-2.01619	A6TCB3	purM	biosynthetic process;cellular biosynthetic process;cellular metabolic process;cellular nitrogen compound biosynthetic process;cellular nitrogen compound metabolic process;cellular process;'de novo' IMP biosynthetic process;heterocycle biosynthetic process;heterocycle metabolic process;IMP biosynthetic process;IMP metabolic process;metabolic process;nitrogen compound metabolic process;nucleobase-c…	adenyl nucleotide binding;adenyl ribonucleotide binding;ATP binding;binding;catalytic activity;cyclo-ligase activity;ligase activity;ligase activity, forming carbon-nitrogen bonds;nucleotide binding;phosphoribosylformylglycinamidine cyclo-ligase activity;purine nucleotide binding;purine ribonucleoside triphosphate binding;purine ribonucleotide binding;ribonucleotide binding	cell part;cytoplasm;intracellular part	ATP-binding;Completeproteome;Cytoplasm;Ligase;Nucleotide-binding;Purinebiosynthesis;Referenceproteome	Phosphoribosylformylglycinamidine cyclo-ligase	4	32.5	36.722	0	84.174	26.3959	26.5325	26.7226	27.0185	27.1004	26.1705	25.2793	26.8801	25.0696	25.2005	24.8883	23.4463
2.56442	-1.96753	A6TCC2	guaA	amine metabolic process;biosynthetic process;carboxylic acid metabolic process;cellular amine metabolic process;cellular amino acid metabolic process;cellular biosynthetic process;cellular ketone metabolic process;cellular metabolic process;cellular nitrogen compound biosynthetic process;cellular nitrogen compound metabolic process;cellular process;glutamine family amino acid metabolic process;gl…	adenyl nucleotide binding;adenyl ribonucleotide binding;ATP binding;binding;carbon-nitrogen ligase activity, with glutamine as amido-N-donor;catalytic activity;GMP synthase (glutamine-hydrolyzing) activity;hydrolase activity;hydrolase activity, acting on acid anhydrides;hydrolase activity, acting on acid anhydrides, in phosphorus-containing anhydrides;ligase activity;ligase activity, forming carb…		ATP-binding;Completeproteome;Glutamineamidotransferase;GMPbiosynthesis;Ligase;Nucleotide-binding;Purinebiosynthesis;Referenceproteome	GMP synthase [glutamine-hydrolyzing]	12	36	58.792	0	109.17	25.7518	25.1051	24.8427	24.8251	24.3667	23.6068	23.0659	23.8442	23.5967	23.8859	22.5921	22.58
1.79089	-1.56664	A6TCC3	guaB	biosynthetic process;cellular biosynthetic process;cellular metabolic process;cellular nitrogen compound biosynthetic process;cellular nitrogen compound metabolic process;cellular process;GMP biosynthetic process;GMP metabolic process;heterocycle biosynthetic process;heterocycle metabolic process;metabolic process;nitrogen compound metabolic process;nucleobase-containing compound biosynthetic pro…	binding;catalytic activity;cation binding;IMP dehydrogenase activity;ion binding;metal ion binding;nucleotide binding;oxidoreductase activity;oxidoreductase activity, acting on CH-OH group of donors;oxidoreductase activity, acting on the CH-OH group of donors, NAD or NADP as acceptor		CBSdomain;Completeproteome;GMPbiosynthesis;Metal-binding;NAD;Oxidoreductase;Potassium;Purinebiosynthesis;Referenceproteome;Repeat	Inosine-5'-monophosphate dehydrogenase	11	44.7	52.057	0	133.52	26.2019	26.1269	26.0405	25.7823	26.3561	25.436	25.1141	25.9775	23.4862	25.566	24.8701	23.9627
2.83682	-1.46159	A6TCD3	hisS	amine metabolic process;amino acid activation;carboxylic acid metabolic process;cellular amine metabolic process;cellular amino acid metabolic process;cellular ketone metabolic process;cellular macromolecule metabolic process;cellular metabolic process;cellular nitrogen compound metabolic process;cellular process;histidyl-tRNA aminoacylation;macromolecule metabolic process;metabolic process;ncRNA…	adenyl nucleotide binding;adenyl ribonucleotide binding;aminoacyl-tRNA ligase activity;ATP binding;binding;catalytic activity;histidine-tRNA ligase activity;ligase activity;ligase activity, forming aminoacyl-tRNA and related compounds;ligase activity, forming carbon-oxygen bonds;nucleotide binding;purine nucleotide binding;purine ribonucleoside triphosphate binding;purine ribonucleotide binding;r…	cell part;cytoplasm;intracellular part	Aminoacyl-tRNAsynthetase;ATP-binding;Completeproteome;Cytoplasm;Ligase;Nucleotide-binding;Proteinbiosynthesis;Referenceproteome	Histidine--tRNA ligase	3	11.6	45.972	0	33.357	23.5238	23.4319	23.9224	24.0374	23.8173	23.395	24.1083	22.3691	22.7896	22.3952	21.7538	22.1306
1.03043	-1.68628	A6TCD7	ndk	biosynthetic process;cellular biosynthetic process;cellular metabolic process;cellular nitrogen compound biosynthetic process;cellular nitrogen compound metabolic process;cellular process;CTP biosynthetic process;CTP metabolic process;GTP biosynthetic process;GTP metabolic process;heterocycle biosynthetic process;heterocycle metabolic process;metabolic process;nitrogen compound metabolic process;…	adenyl nucleotide binding;adenyl ribonucleotide binding;ATP binding;binding;catalytic activity;cation binding;ion binding;kinase activity;metal ion binding;nucleobase-containing compound kinase activity;nucleoside diphosphate kinase activity;nucleotide binding;phosphotransferase activity, phosphate group as acceptor;purine nucleotide binding;purine ribonucleoside triphosphate binding;purine ribon…	cell part;cytoplasm;intracellular part	ATP-binding;Completeproteome;Cytoplasm;Kinase;Magnesium;Metal-binding;Nucleotide-binding;Nucleotidemetabolism;Phosphoprotein;Referenceproteome;Transferase	Nucleoside diphosphate kinase	6	55.9	15.526	0	38.488	25.7535	24.8187	24.662	24.5096	24.2417	23.9977	23.8198	24.2408	21.8528	22.4202	23.2386	25.4871
2.92392	1.42301	A6TCE4	pepB		aminopeptidase activity;binding;catalytic activity;cation binding;exopeptidase activity;hydrolase activity;ion binding;manganese ion binding;metal ion binding;metalloexopeptidase activity;metallopeptidase activity;peptidase activity;peptidase activity, acting on L-amino acid peptides;transition metal ion binding	cell part;cytoplasm;intracellular part	Aminopeptidase;Completeproteome;Cytoplasm;Hydrolase;Manganese;Metal-binding;Protease;Referenceproteome	Peptidase B	6	20.8	46.218	0	38.071	22.8387	22.3728	22.4624	22.8608	23.4643	23.8728	24.0428	24.3522	24.6358	23.7796	24.1096	23.7018
2.051	-2.39	A6TCF1	iscS	amine metabolic process;carboxylic acid metabolic process;cellular amine metabolic process;cellular amino acid metabolic process;cellular ketone metabolic process;cellular metabolic process;cellular nitrogen compound metabolic process;cellular process;cysteine metabolic process;metabolic process;nitrogen compound metabolic process;organic acid metabolic process;oxoacid metabolic process;primary m…	2 iron, 2 sulfur cluster binding;binding;catalytic activity;cation binding;cofactor binding;cysteine desulfurase activity;ion binding;iron-sulfur cluster binding;metal cluster binding;metal ion binding;pyridoxal phosphate binding;sulfurtransferase activity;transferase activity;transferase activity, transferring sulfur-containing groups;vitamin B6 binding;vitamin binding	cell part;cytoplasm;intracellular part	2Fe-2S;Completeproteome;Cytoplasm;Iron;Iron-sulfur;Metal-binding;Pyridoxalphosphate;Referenceproteome;Transferase	Cysteine desulfurase IscS	12	48	45.056	0	189.57	25.6625	25.7313	25.4632	25.8689	25.694	25.3797	25.508	26.2166	24.6973	23.9799	22.251	22.2377
1.94058	-1.30351	A6TCG5	glyA	amine biosynthetic process;amine metabolic process;biosynthetic process;carboxylic acid biosynthetic process;carboxylic acid metabolic process;cellular amine metabolic process;cellular amino acid biosynthetic process;cellular amino acid metabolic process;cellular aromatic compound metabolic process;cellular biosynthetic process;cellular ketone metabolic process;cellular metabolic process;cellular…	binding;catalytic activity;cofactor binding;glycine hydroxymethyltransferase activity;hydroxymethyl-, formyl- and related transferase activity;pyridoxal phosphate binding;transferase activity;transferase activity, transferring one-carbon groups;vitamin B6 binding;vitamin binding	cell part;cytoplasm;intracellular part	Amino-acidbiosynthesis;Completeproteome;Cytoplasm;One-carbonmetabolism;Pyridoxalphosphate;Referenceproteome;Transferase	Serine hydroxymethyltransferase	13	48	45.439	0	246.57	27.9025	27.606	27.1315	27.3324	26.9022	26.2468	25.6422	26.4037	25.4053	26.939	26.0263	26.3879
2.78625	-2.16048	A6TCH1	purL	amine metabolic process;biosynthetic process;carboxylic acid metabolic process;cellular amine metabolic process;cellular amino acid metabolic process;cellular biosynthetic process;cellular ketone metabolic process;cellular metabolic process;cellular nitrogen compound biosynthetic process;cellular nitrogen compound metabolic process;cellular process;'de novo' IMP biosynthetic process;glutamine fam…	adenyl nucleotide binding;adenyl ribonucleotide binding;ATP binding;binding;carbon-nitrogen ligase activity, with glutamine as amido-N-donor;catalytic activity;cation binding;ion binding;ligase activity;ligase activity, forming carbon-nitrogen bonds;metal ion binding;nucleotide binding;phosphoribosylformylglycinamidine synthase activity;purine nucleotide binding;purine ribonucleoside triphosphate…	cell part;cytoplasm;intracellular part	ATP-binding;Completeproteome;Cytoplasm;Glutamineamidotransferase;Ligase;Magnesium;Metal-binding;Nucleotide-binding;Purinebiosynthesis;Referenceproteome	Phosphoribosylformylglycinamidine synthase	6	11	140.87	0	90.849	25.6325	26.015	25.2459	24.4313	24.1751	24.0495	22.3317	22.4874	22.9877	23.7593	22.7802	23.1555
0.748925	-1.55922	A6TCJ1	grcA		catalytic activity		Completeproteome;Organicradical;Referenceproteome	Autonomous glycyl radical cofactor	7	59.1	14.243	0	64.679	25.7228	25.3382	25.5917	25.8027	25.569	25.3401	25.1	25.4882	23.1754	23.0137	22.9253	27.1042
2.91806	-1.87032	A6TCK8	aroF	amine biosynthetic process;amine metabolic process;aromatic amino acid family biosynthetic process;aromatic amino acid family metabolic process;aromatic compound biosynthetic process;biosynthetic process;carboxylic acid biosynthetic process;carboxylic acid metabolic process;cellular amine metabolic process;cellular amino acid biosynthetic process;cellular amino acid metabolic process;cellular aro…	3-deoxy-7-phosphoheptulonate synthase activity;catalytic activity;transferase activity;transferase activity, transferring alkyl or aryl (other than methyl) groups		Amino-acidbiosynthesis;Aromaticaminoacidbiosynthesis;Completeproteome;Referenceproteome;Transferase	Phospho-2-dehydro-3-deoxyheptonate aldolase	6	33.1	38.817	0	79.304	25.8882	25.5305	24.7559	25.681	25.2478	24.9467	26.1161	25.6092	23.9449	23.5924	23.8388	22.9982
1.97008	-1.65399	A6TCL7	rpsP	biosynthetic process;cellular biosynthetic process;cellular macromolecule biosynthetic process;cellular macromolecule metabolic process;cellular metabolic process;cellular process;cellular protein metabolic process;macromolecule biosynthetic process;macromolecule metabolic process;metabolic process;primary metabolic process;protein metabolic process;translation	structural constituent of ribosome;structural molecule activity	cell part;cytoplasmic part;intracellular non-membrane-bounded organelle;intracellular organelle;intracellular part;macromolecular complex;non-membrane-bounded organelle;organelle;ribonucleoprotein complex;ribosome	Completeproteome;Referenceproteome;Ribonucleoprotein;Ribosomalprotein	30S ribosomal protein S16	4	58.5	9.0903	0	40.254	26.9292	26.3888	26.6594	26.7975	26.2752	26.2413	26.3623	25.7551	26.1079	24.0193	25.2618	24.7699
1.08463	-1.26378	A6TCM1	grpE	cellular macromolecule metabolic process;cellular metabolic process;cellular process;cellular protein metabolic process;macromolecule metabolic process;metabolic process;primary metabolic process;protein folding;protein metabolic process	adenyl nucleotide binding;adenyl-nucleotide exchange factor activity;ATPase regulator activity;binding;enzyme regulator activity;nucleoside-triphosphatase regulator activity;nucleotide binding;purine nucleotide binding	cell part;cytoplasm;intracellular part	Chaperone;Completeproteome;Cytoplasm;Referenceproteome;Stressresponse	Protein GrpE	3	14.3	21.734	0	39.314	25.1066	24.8102	24.0747	24.834	25.5733	22.7284	24.5905	25.1079	22.4684	23.5494	22.7604	24.9923
1.80584	1.09416	A6TCV7	KPN_03022				Completeproteome;Referenceproteome		4	47.1	11.247	0	26.168	24.5856	24.6155	24.9833	24.2137	24.9592	25.478	26.6123	24.8201	26.5095	25.3863	25.6663	25.2126
3.41812	-0.965979	A6TCW1	recA	cell communication;cellular macromolecule metabolic process;cellular metabolic process;cellular nitrogen compound metabolic process;cellular process;cellular response to external stimulus;cellular response to extracellular stimulus;cellular response to stimulus;cellular response to stress;DNA metabolic process;DNA recombination;DNA repair;macromolecule metabolic process;metabolic process;nitrogen…	adenyl nucleotide binding;adenyl ribonucleotide binding;ATP binding;ATPase activity;ATPase activity, coupled;binding;catalytic activity;damaged DNA binding;DNA binding;DNA-dependent ATPase activity;hydrolase activity;hydrolase activity, acting on acid anhydrides;hydrolase activity, acting on acid anhydrides, in phosphorus-containing anhydrides;nucleic acid binding;nucleoside-triphosphatase activi…	cell part;cytoplasm;intracellular part	ATP-binding;Completeproteome;Cytoplasm;DNA-binding;DNAdamage;DNArecombination;DNArepair;Nucleotide-binding;Referenceproteome;SOSresponse	Protein RecA	6	35.8	37.923	0	74.242	24.5896	25.133	24.809	25.0686	25.6532	24.191	22.8524	24.0535	23.9733	23.9224	24.0438	23.7967
3.88907	-3.28503	A6TD43	cysN	biosynthetic process;cellular biosynthetic process;cellular metabolic process;cellular process;hydrogen sulfide biosynthetic process;hydrogen sulfide metabolic process;metabolic process;sulfate assimilation;sulfur compound biosynthetic process;sulfur compound metabolic process	adenyl nucleotide binding;adenyl ribonucleotide binding;adenylyltransferase activity;ATP binding;binding;catalytic activity;GTP binding;GTPase activity;guanyl nucleotide binding;guanyl ribonucleotide binding;hydrolase activity;hydrolase activity, acting on acid anhydrides;hydrolase activity, acting on acid anhydrides, in phosphorus-containing anhydrides;nucleoside-triphosphatase activity;nucleoti…		ATP-binding;Completeproteome;GTP-binding;Nucleotide-binding;Nucleotidyltransferase;Referenceproteome;Transferase	Sulfate adenylyltransferase subunit 1	15	49.9	52.491	0	139.45	27.0824	26.1171	25.5756	25.8033	25.7107	25.0034	24.8248	25.3108	22.5723	22.875	22.6222	23.3689
2.8696	-1.57573	A6TD44	cysD	biosynthetic process;cellular biosynthetic process;cellular metabolic process;cellular process;hydrogen sulfide biosynthetic process;hydrogen sulfide metabolic process;metabolic process;oxidation-reduction process;sulfate assimilation;sulfate reduction;sulfur compound biosynthetic process;sulfur compound metabolic process	adenyl nucleotide binding;adenyl ribonucleotide binding;adenylyltransferase activity;ATP binding;binding;catalytic activity;nucleotide binding;nucleotidyltransferase activity;purine nucleotide binding;purine ribonucleoside triphosphate binding;purine ribonucleotide binding;ribonucleotide binding;sulfate adenylyltransferase (ATP) activity;sulfate adenylyltransferase activity;transferase activity;t…		ATP-binding;Completeproteome;Nucleotide-binding;Nucleotidyltransferase;Referenceproteome;Transferase	Sulfate adenylyltransferase subunit 2	4	21.2	35.214	0	28.915	24.8549	24.6579	24.5793	24.8251	24.6272	25.8052	22.3347	24.4078	23.8651	22.8953	22.6002	23.2536
2.74378	-1.66924	A6TD47	cysH	amine biosynthetic process;amine metabolic process;aspartate family amino acid biosynthetic process;aspartate family amino acid metabolic process;biosynthetic process;carboxylic acid biosynthetic process;carboxylic acid metabolic process;cellular amine metabolic process;cellular amino acid biosynthetic process;cellular amino acid metabolic process;cellular biosynthetic process;cellular ketone met…	catalytic activity;oxidoreductase activity;oxidoreductase activity, acting on a sulfur group of donors;oxidoreductase activity, acting on a sulfur group of donors, disulfide as acceptor;phosphoadenylyl-sulfate reductase (thioredoxin) activity	cell part;cytoplasm;intracellular part	Completeproteome;Cytoplasm;Oxidoreductase;Referenceproteome	Phosphoadenosine phosphosulfate reductase	5	25.8	27.814	0	31.08	24.5732	24.5144	24.1144	24.4491	24.5187	22.43	23.3458	22.5833	22.7837	22.84	23.3953	21.9552
3.76138	-1.99372	A6TD49	cysJ	amine biosynthetic process;amine metabolic process;biosynthetic process;carboxylic acid biosynthetic process;carboxylic acid metabolic process;cellular amine metabolic process;cellular amino acid biosynthetic process;cellular amino acid metabolic process;cellular biosynthetic process;cellular ketone metabolic process;cellular metabolic process;cellular nitrogen compound biosynthetic process;cellu…	binding;catalytic activity;cation binding;coenzyme binding;cofactor binding;flavin adenine dinucleotide binding;FMN binding;ion binding;iron ion binding;metal ion binding;nucleotide binding;oxidoreductase activity;oxidoreductase activity, acting on a sulfur group of donors;oxidoreductase activity, acting on a sulfur group of donors, NAD or NADP as acceptor;oxidoreductase activity, acting on NADH …		Amino-acidbiosynthesis;Completeproteome;Cysteinebiosynthesis;Electrontransport;FAD;Flavoprotein;FMN;NADP;Oxidoreductase;Referenceproteome;Transport	Sulfite reductase [NADPH] flavoprotein alpha-component	11	36.1	66.019	0	84.191	25.4976	25.3763	25.3333	25.2297	25.1753	24.6644	25.4367	25.7192	23.4741	23.8777	23.3711	22.7392
1.02114	-1.26405	A6TD54	pyrG	amine metabolic process;biosynthetic process;carboxylic acid metabolic process;cellular amine metabolic process;cellular amino acid metabolic process;cellular biosynthetic process;cellular ketone metabolic process;cellular metabolic process;cellular nitrogen compound biosynthetic process;cellular nitrogen compound metabolic process;cellular process;CTP biosynthetic process;CTP metabolic process;'…	adenyl nucleotide binding;adenyl ribonucleotide binding;ATP binding;binding;catalytic activity;CTP synthase activity;ligase activity;ligase activity, forming carbon-nitrogen bonds;nucleotide binding;purine nucleotide binding;purine ribonucleoside triphosphate binding;purine ribonucleotide binding;ribonucleotide binding		ATP-binding;Completeproteome;Glutamineamidotransferase;Ligase;Nucleotide-binding;Pyrimidinebiosynthesis;Referenceproteome	CTP synthase	3	11.2	60.162	0	246.5	24.4638	24.5128	22.2348	24.6275	24.7023	22.7713	22.8207	23.8267	22.3143	23.511	22.3968	22.5606
3.65193	-1.69725	A6TDP4;A6T5T1	lysS	amine metabolic process;amino acid activation;carboxylic acid metabolic process;cellular amine metabolic process;cellular amino acid metabolic process;cellular ketone metabolic process;cellular macromolecule metabolic process;cellular metabolic process;cellular nitrogen compound metabolic process;cellular process;lysyl-tRNA aminoacylation;macromolecule metabolic process;metabolic process;ncRNA me…	adenyl nucleotide binding;adenyl ribonucleotide binding;aminoacyl-tRNA ligase activity;ATP binding;binding;catalytic activity;cation binding;ion binding;ligase activity;ligase activity, forming aminoacyl-tRNA and related compounds;ligase activity, forming carbon-oxygen bonds;lysine-tRNA ligase activity;magnesium ion binding;metal ion binding;nucleic acid binding;nucleotide binding;purine nucleoti…	cell part;cytoplasm;intracellular part	Aminoacyl-tRNAsynthetase;ATP-binding;Completeproteome;Cytoplasm;Ligase;Magnesium;Metal-binding;Nucleotide-binding;Proteinbiosynthesis;Referenceproteome	Lysine--tRNA ligase	6	20.6	57.55	0	52.364	24.4085	24.0766	24.3756	24.5992	24.2757	23.9934	24.4841	25.3395	23.085	22.8566	22.4755	22.2537
2.43222	-1.30162	A6TDS9	yggB	cellular process;establishment of localization;transmembrane transport;transport		cell part;membrane	Completeproteome;Referenceproteome		3	17.5	30.947	0	48.097	23.8152	24.4978	24.0651	24.2189	23.7578	23.573	21.7756	23.4873	23.4476	22.3147	23.0012	22.627
1.07326	-1.08735	A6TDT0	fbaA	alcohol catabolic process;alcohol metabolic process;carbohydrate catabolic process;carbohydrate metabolic process;catabolic process;cellular carbohydrate catabolic process;cellular carbohydrate metabolic process;cellular metabolic process;cellular process;generation of precursor metabolites and energy;glucose catabolic process;glucose metabolic process;glycolysis;hexose catabolic process;hexose m…	aldehyde-lyase activity;binding;carbon-carbon lyase activity;catalytic activity;cation binding;fructose-bisphosphate aldolase activity;ion binding;lyase activity;metal ion binding;transition metal ion binding;zinc ion binding		Completeproteome;Lyase;Metal-binding;Referenceproteome;Zinc		10	49.9	39.142	0	110.13	27.604	27.4281	27.051	27.3842	27.7257	26.9585	26.8496	27.7455	26.2914	25.3742	25.7391	27.7133
4.09619	-2.86223	A6TDT3;A6T7I9	tktA		binding;catalytic activity;cation binding;ion binding;metal ion binding;transferase activity;transferase activity, transferring aldehyde or ketonic groups;transketolase activity		Calcium;Completeproteome;Magnesium;Metal-binding;Referenceproteome;Thiaminepyrophosphate;Transferase	Transketolase	12	30.9	71.95	0	188.39	27.3877	27.6339	26.8022	27.0212	26.6411	25.8641	25.5287	26.6054	23.6497	24.7109	24.5945	24.4409
3.01993	-2.49479	A6TDV1	metK	amine biosynthetic process;amine metabolic process;biosynthetic process;carboxylic acid biosynthetic process;carboxylic acid metabolic process;cellular amine metabolic process;cellular amino acid biosynthetic process;cellular amino acid metabolic process;cellular biosynthetic process;cellular ketone metabolic process;cellular metabolic process;cellular modified amino acid biosynthetic process;cel…	adenyl nucleotide binding;adenyl ribonucleotide binding;ATP binding;binding;catalytic activity;cation binding;ion binding;magnesium ion binding;metal ion binding;methionine adenosyltransferase activity;nucleotide binding;purine nucleotide binding;purine ribonucleoside triphosphate binding;purine ribonucleotide binding;ribonucleotide binding;transferase activity;transferase activity, transferring …	cell part;cytoplasm;intracellular part	ATP-binding;Cobalt;Completeproteome;Cytoplasm;Magnesium;Metal-binding;Nucleotide-binding;One-carbonmetabolism;Potassium;Referenceproteome;Transferase	S-adenosylmethionine synthase	14	62.5	41.907	0	281.68	28.7838	28.7015	28.246	28.463	28.0269	27.6236	28.2714	27.7146	26.8919	25.05	26.4244	25.8488
0.923848	-1.63373	A6TED7	yqjD				Completeproteome;Referenceproteome		3	39.6	11.015	0	258.16	25.8622	26.4206	26.2056	25.2595	21.6221	22.4668	22.6896	24.9943	22.5946	23.0557	25.5707	25.992
3.67331	-2.24415	A6TEI7	infB		binding;catalytic activity;GTP binding;GTPase activity;guanyl nucleotide binding;guanyl ribonucleotide binding;hydrolase activity;hydrolase activity, acting on acid anhydrides;hydrolase activity, acting on acid anhydrides, in phosphorus-containing anhydrides;nucleic acid binding;nucleoside-triphosphatase activity;nucleotide binding;purine nucleotide binding;purine ribonucleoside triphosphate bind…	cell part;cytoplasm;intracellular part	Completeproteome;Cytoplasm;GTP-binding;Initiationfactor;Nucleotide-binding;Proteinbiosynthesis;Referenceproteome	Translation initiation factor IF-2	9	16.7	98.075	0	97.943	25.1823	25.3537	25.4749	25.905	25.8513	23.0616	24.2024	26.065	23.8816	23.2165	22.7514	23.0898
1.70712	-2.27503	A6TEJ0	argG	amine biosynthetic process;amine metabolic process;arginine biosynthetic process;arginine metabolic process;biosynthetic process;carboxylic acid biosynthetic process;carboxylic acid metabolic process;cellular amine metabolic process;cellular amino acid biosynthetic process;cellular amino acid metabolic process;cellular biosynthetic process;cellular ketone metabolic process;cellular metabolic proc…	adenyl nucleotide binding;adenyl ribonucleotide binding;argininosuccinate synthase activity;ATP binding;binding;catalytic activity;ligase activity;ligase activity, forming carbon-nitrogen bonds;nucleotide binding;purine nucleotide binding;purine ribonucleoside triphosphate binding;purine ribonucleotide binding;ribonucleotide binding	cell part;cytoplasm;intracellular part	Amino-acidbiosynthesis;Argininebiosynthesis;ATP-binding;Completeproteome;Cytoplasm;Ligase;Nucleotide-binding;Referenceproteome	Argininosuccinate synthase	7	30	49.812	0	229.05	25.6047	25.3127	25.5098	26.0123	25.6976	25.5802	25.3178	25.6061	25.3438	22.3647	22.3397	23.2911
1.31316	-1.44426	A6TEK8	murA	alcohol biosynthetic process;alcohol metabolic process;amine metabolic process;amino sugar biosynthetic process;amino sugar metabolic process;aminoglycan biosynthetic process;aminoglycan metabolic process;biological regulation;biosynthetic process;carbohydrate biosynthetic process;carbohydrate metabolic process;cell cycle;cell division;cell wall macromolecule biosynthetic process;cell wall macrom…	catalytic activity;transferase activity;transferase activity, transferring alkyl or aryl (other than methyl) groups;UDP-N-acetylglucosamine 1-carboxyvinyltransferase activity	cell part;cytoplasm;intracellular part	Cellcycle;Celldivision;Cellshape;Cellwallbiogenesis/degradation;Completeproteome;Cytoplasm;Peptidoglycansynthesis;Pyruvate;Referenceproteome;Transferase	UDP-N-acetylglucosamine 1-carboxyvinyltransferase	5	23.4	44.585	0	61.638	25.4733	25.7815	25.8708	26.0515	25.5205	25.1632	25.6806	25.2528	24.6347	24.9621	25.1422	22.6611
1.92359	-2.08306	A6TEN3	gltB	amine biosynthetic process;amine metabolic process;biosynthetic process;carboxylic acid biosynthetic process;carboxylic acid metabolic process;cellular amine metabolic process;cellular amino acid biosynthetic process;cellular amino acid metabolic process;cellular biosynthetic process;cellular ketone metabolic process;cellular metabolic process;cellular nitrogen compound biosynthetic process;cellu…	catalytic activity;glutamate synthase activity;oxidoreductase activity;oxidoreductase activity, acting on the CH-NH2 group of donors		Completeproteome;Referenceproteome		26	31.1	159.1	0	231.11	27.4622	27.9322	26.8908	27.1981	26.9875	26.4374	26.0735	26.4401	24.6146	26.7188	25.5154	24.3022
1.31093	-1.64571	A6TEN4	gltD	amine biosynthetic process;amine metabolic process;biosynthetic process;carboxylic acid biosynthetic process;carboxylic acid metabolic process;cellular amine metabolic process;cellular amino acid biosynthetic process;cellular amino acid metabolic process;cellular biosynthetic process;cellular ketone metabolic process;cellular metabolic process;cellular nitrogen compound biosynthetic process;cellu…	binding;catalytic activity;iron-sulfur cluster binding;metal cluster binding;oxidoreductase activity;oxidoreductase activity, acting on the CH-NH2 group of donors;oxidoreductase activity, acting on the CH-NH2 group of donors, NAD or NADP as acceptor		Completeproteome;Referenceproteome		7	28	51.928	0	116.2	25.8648	25.1664	24.6952	24.885	24.4059	23.4218	26.0323	24.0388	22.0179	23.5593	23.4154	25.0359
2.5207	-1.65226	A6TEN8	rpsI	biosynthetic process;cellular biosynthetic process;cellular macromolecule biosynthetic process;cellular macromolecule metabolic process;cellular metabolic process;cellular process;cellular protein metabolic process;macromolecule biosynthetic process;macromolecule metabolic process;metabolic process;primary metabolic process;protein metabolic process;translation	structural constituent of ribosome;structural molecule activity	cell part;cytoplasmic part;intracellular non-membrane-bounded organelle;intracellular organelle;intracellular part;macromolecular complex;non-membrane-bounded organelle;organelle;ribonucleoprotein complex;ribosome	Completeproteome;Referenceproteome;Ribonucleoprotein;Ribosomalprotein	30S ribosomal protein S9	5	33.8	14.856	0	131	23.7512	24.7969	24.9123	25.1884	25.1263	23.3138	22.7731	22.0651	23.3647	23.1006	22.7428	22.8316
1.31658	-1.84651	A6TEN9	rplM	biosynthetic process;cellular biosynthetic process;cellular macromolecule biosynthetic process;cellular macromolecule metabolic process;cellular metabolic process;cellular process;cellular protein metabolic process;macromolecule biosynthetic process;macromolecule metabolic process;metabolic process;primary metabolic process;protein metabolic process;translation	structural constituent of ribosome;structural molecule activity	cell part;cytoplasmic part;intracellular non-membrane-bounded organelle;intracellular organelle;intracellular part;macromolecular complex;non-membrane-bounded organelle;organelle;ribonucleoprotein complex;ribosome	Completeproteome;Referenceproteome;Ribonucleoprotein;Ribosomalprotein	50S ribosomal protein L13	4	42.3	16.109	0	83.305	26.8112	26.3825	26.4409	26.1119	25.7972	25.6547	25.3907	25.0999	25.9031	24.0884	22.7465	25.6223
2.41932	-1.30196	A6TEQ3	mdh	acetyl-CoA catabolic process;acetyl-CoA metabolic process;carbohydrate metabolic process;carboxylic acid metabolic process;catabolic process;cellular catabolic process;cellular ketone metabolic process;cellular metabolic process;cellular process;coenzyme catabolic process;coenzyme metabolic process;cofactor catabolic process;cofactor metabolic process;dicarboxylic acid metabolic process;malate me…	catalytic activity;L-malate dehydrogenase activity;malate dehydrogenase activity;oxidoreductase activity;oxidoreductase activity, acting on CH-OH group of donors;oxidoreductase activity, acting on the CH-OH group of donors, NAD or NADP as acceptor		Completeproteome;NAD;Oxidoreductase;Referenceproteome;Tricarboxylicacidcycle	Malate dehydrogenase	4	22.8	32.426	0	85.506	25.0691	25.2383	24.4292	24.2496	24.2758	23.373	22.5313	23.342	23.2775	23.2532	23.8989	23.3487
0.869932	-1.35502	A6TEU8	rpoA	biosynthetic process;cellular biosynthetic process;cellular macromolecule biosynthetic process;cellular macromolecule metabolic process;cellular metabolic process;cellular nitrogen compound metabolic process;cellular process;macromolecule biosynthetic process;macromolecule metabolic process;metabolic process;nitrogen compound metabolic process;nucleic acid metabolic process;nucleobase-containing …	binding;catalytic activity;DNA binding;DNA-directed RNA polymerase activity;nucleic acid binding;nucleotidyltransferase activity;RNA polymerase activity;transferase activity;transferase activity, transferring phosphorus-containing groups		Completeproteome;DNA-directedRNApolymerase;Nucleotidyltransferase;Referenceproteome;Transcription;Transferase	DNA-directed RNA polymerase subunit alpha	9	39.5	36.465	0	163.7	25.8902	25.7052	25.9852	25.9527	25.2687	25.5994	26.3635	26.3997	24.6201	23.2524	23.5388	26.702
3.22657	1.57907	A6TEV0	rpsK	biosynthetic process;cellular biosynthetic process;cellular macromolecule biosynthetic process;cellular macromolecule metabolic process;cellular metabolic process;cellular process;cellular protein metabolic process;macromolecule biosynthetic process;macromolecule metabolic process;metabolic process;primary metabolic process;protein metabolic process;translation	binding;nucleic acid binding;RNA binding;rRNA binding;structural constituent of ribosome;structural molecule activity	cell part;cytoplasmic part;intracellular non-membrane-bounded organelle;intracellular organelle;intracellular part;macromolecular complex;non-membrane-bounded organelle;organelle;ribonucleoprotein complex;ribosome	Completeproteome;Referenceproteome;Ribonucleoprotein;Ribosomalprotein;RNA-binding;rRNA-binding	30S ribosomal protein S11	6	47.3	13.859	0	234.85	25.1858	25.0527	25.8646	25.6978	26.1029	26.1108	26.7874	26.4808	27.3387	26.7744	26.8163	27.1878
1.58725	-1.3084	A6TEW4	rpmC	biosynthetic process;cellular biosynthetic process;cellular macromolecule biosynthetic process;cellular macromolecule metabolic process;cellular metabolic process;cellular process;cellular protein metabolic process;macromolecule biosynthetic process;macromolecule metabolic process;metabolic process;primary metabolic process;protein metabolic process;translation	structural constituent of ribosome;structural molecule activity	cell part;cytoplasmic part;intracellular non-membrane-bounded organelle;intracellular organelle;intracellular part;macromolecular complex;non-membrane-bounded organelle;organelle;ribonucleoprotein complex;ribosome	Completeproteome;Referenceproteome;Ribonucleoprotein;Ribosomalprotein	50S ribosomal protein L29	2	46	7.2434	0	19.054	25.2882	25.1694	26.1993	24.974	26.6465	21.6488	25.6789	25.7628	24.4567	24.057	24.7505	23.1331
1.86059	-1.69405	A6TEW5	rplP	biosynthetic process;cellular biosynthetic process;cellular macromolecule biosynthetic process;cellular macromolecule metabolic process;cellular metabolic process;cellular process;cellular protein metabolic process;macromolecule biosynthetic process;macromolecule metabolic process;metabolic process;primary metabolic process;protein metabolic process;translation	binding;nucleic acid binding;RNA binding;rRNA binding;structural constituent of ribosome;structural molecule activity;tRNA binding	cell part;cytoplasmic part;intracellular non-membrane-bounded organelle;intracellular organelle;intracellular part;macromolecular complex;non-membrane-bounded organelle;organelle;ribonucleoprotein complex;ribosome	Completeproteome;Referenceproteome;Ribonucleoprotein;Ribosomalprotein;RNA-binding;rRNA-binding;tRNA-binding	50S ribosomal protein L16	4	39	15.25	0	58.159	25.5042	26.0856	25.8224	25.9433	25.8294	25.1779	25.0546	25.0859	24.5987	22.7165	24.5902	24.674
2.70708	-1.73792	A6TEW9	rplB	biosynthetic process;cellular biosynthetic process;cellular macromolecule biosynthetic process;cellular macromolecule metabolic process;cellular metabolic process;cellular process;cellular protein metabolic process;macromolecule biosynthetic process;macromolecule metabolic process;metabolic process;primary metabolic process;protein metabolic process;translation	binding;catalytic activity;nucleic acid binding;RNA binding;rRNA binding;structural constituent of ribosome;structural molecule activity;transferase activity	cell part;intracellular organelle part;intracellular part;large ribosomal subunit;macromolecular complex;organelle part;ribonucleoprotein complex	Completeproteome;Referenceproteome;Ribonucleoprotein;Ribosomalprotein;RNA-binding;rRNA-binding	50S ribosomal protein L2	10	39.6	29.834	0	323.31	27.4796	27.052	26.9274	26.727	26.7256	26.2222	26.122	26.1266	25.9906	24.6434	25.0603	25.5399
1.18803	-2.04146	A6TEX1	rplD	biosynthetic process;cellular biosynthetic process;cellular macromolecule biosynthetic process;cellular macromolecule metabolic process;cellular metabolic process;cellular process;cellular protein metabolic process;macromolecule biosynthetic process;macromolecule metabolic process;metabolic process;primary metabolic process;protein metabolic process;translation	binding;nucleic acid binding;RNA binding;rRNA binding;structural constituent of ribosome;structural molecule activity	cell part;cytoplasmic part;intracellular non-membrane-bounded organelle;intracellular organelle;intracellular part;macromolecular complex;non-membrane-bounded organelle;organelle;ribonucleoprotein complex;ribosome	Completeproteome;Referenceproteome;Ribonucleoprotein;Ribosomalprotein;RNA-binding;rRNA-binding	50S ribosomal protein L4	6	49.3	22.113	0	78.984	26.5023	26.5525	26.0535	26.7761	26.5457	26.412	25.8801	26.5929	26.1034	23.0775	22.7091	25.8285
4.35791	1.49246	A6TEX3	rpsJ	biosynthetic process;cellular biosynthetic process;cellular macromolecule biosynthetic process;cellular macromolecule metabolic process;cellular metabolic process;cellular process;cellular protein metabolic process;macromolecule biosynthetic process;macromolecule metabolic process;metabolic process;primary metabolic process;protein metabolic process;translation	binding;nucleic acid binding;RNA binding;structural constituent of ribosome;structural molecule activity;tRNA binding	cell part;cytoplasmic part;intracellular non-membrane-bounded organelle;intracellular organelle;intracellular part;macromolecular complex;non-membrane-bounded organelle;organelle;ribonucleoprotein complex;ribosome	Completeproteome;Referenceproteome;Ribonucleoprotein;Ribosomalprotein	30S ribosomal protein S10	6	49.5	11.766	0	272.73	26.1539	25.8096	26.1886	25.9945	26.2909	26.8935	28.0264	27.0801	27.3149	27.3869	27.6008	27.8139
0.804066	-1.2263	A6TEX5	bfr	biological regulation;cation homeostasis;cation transport;cellular cation homeostasis;cellular chemical homeostasis;cellular homeostasis;cellular ion homeostasis;cellular iron ion homeostasis;cellular metal ion homeostasis;cellular process;chemical homeostasis;establishment of localization;homeostatic process;ion homeostasis;ion transport;iron ion homeostasis;iron ion transport;metal ion homeosta…	binding;catalytic activity;cation binding;ferric iron binding;ferroxidase activity;ion binding;iron ion binding;metal ion binding;oxidoreductase activity;oxidoreductase activity, oxidizing metal ions;oxidoreductase activity, oxidizing metal ions, oxygen as acceptor;transition metal ion binding		Completeproteome;Heme;Iron;Ironstorage;Metal-binding;Referenceproteome	Bacterioferritin	4	42.2	14.881	0	88.69	25.9164	25.7084	26.0577	26.2161	26.4287	25.7996	26.4451	27.043	25.1142	26.1843	25.0605	22.6343
3.02128	-1.02082	A6TEX8	fusA		binding;catalytic activity;GTP binding;GTPase activity;guanyl nucleotide binding;guanyl ribonucleotide binding;hydrolase activity;hydrolase activity, acting on acid anhydrides;hydrolase activity, acting on acid anhydrides, in phosphorus-containing anhydrides;nucleic acid binding;nucleoside-triphosphatase activity;nucleotide binding;purine nucleotide binding;purine ribonucleoside triphosphate bind…	cell part;cytoplasm;intracellular part	Completeproteome;Cytoplasm;Elongationfactor;GTP-binding;Nucleotide-binding;Proteinbiosynthesis;Referenceproteome	Elongation factor G	28	62.6	77.542	0	323.31	29.0228	29.0204	28.9465	29.054	28.8191	28.2558	28.4415	28.4474	27.9681	28.3452	27.543	28.104
2.76276	1.93781	A6TEY0	rpsL	biosynthetic process;cellular biosynthetic process;cellular macromolecule biosynthetic process;cellular macromolecule metabolic process;cellular metabolic process;cellular process;cellular protein metabolic process;macromolecule biosynthetic process;macromolecule metabolic process;metabolic process;primary metabolic process;protein metabolic process;translation	binding;nucleic acid binding;RNA binding;rRNA binding;structural constituent of ribosome;structural molecule activity;tRNA binding	cell part;intracellular organelle part;intracellular part;macromolecular complex;organelle part;ribonucleoprotein complex;small ribosomal subunit	Completeproteome;Methylation;Referenceproteome;Ribonucleoprotein;Ribosomalprotein;RNA-binding;rRNA-binding;tRNA-binding	30S ribosomal protein S12	3	16.9	13.751	0	20.394	24.888	25.0688	25.5793	25.1905	26.2917	26.4363	26.4215	26.104	27.6641	26.3142	26.8425	27.657
3.79233	-2.0965	A6TEZ6	crp	biosynthetic process;cellular biosynthetic process;cellular macromolecule biosynthetic process;cellular macromolecule metabolic process;cellular metabolic process;cellular nitrogen compound metabolic process;cellular process;macromolecule biosynthetic process;macromolecule metabolic process;metabolic process;nitrogen compound metabolic process;nucleic acid metabolic process;nucleobase-containing …	binding;DNA binding;nucleic acid binding;nucleic acid binding transcription factor activity;sequence-specific DNA binding transcription factor activity	cell part;intracellular	Completeproteome;DNA-binding;Receptor;Referenceproteome;Transcription;Transcriptionregulation		4	28.6	23.656	0	89.193	24.7727	25.1327	25.2509	25.2883	26.1532	25.1141	23.6046	22.983	22.7136	22.6618	23.6274	23.0558
2.33118	-2.85057	A6TF13	aroB	amine biosynthetic process;amine metabolic process;aromatic amino acid family biosynthetic process;aromatic amino acid family metabolic process;aromatic compound biosynthetic process;biosynthetic process;carboxylic acid biosynthetic process;carboxylic acid metabolic process;cellular amine metabolic process;cellular amino acid biosynthetic process;cellular amino acid metabolic process;cellular aro…	3-dehydroquinate synthase activity;carbon-oxygen lyase activity;carbon-oxygen lyase activity, acting on phosphates;catalytic activity;lyase activity	cell part;cytoplasm;intracellular part	Amino-acidbiosynthesis;Aromaticaminoacidbiosynthesis;Cobalt;Completeproteome;Cytoplasm;Lyase;NAD;Referenceproteome;Zinc	3-dehydroquinate synthase	2	12.1	39.213	0	71.836	25.2223	25.2438	27.615	25.4027	24.9962	23.1045	21.8743	26.0831	23.6983	23.2965	22.4567	22.6299
4.48365	-2.56141	A6TF52	asd	amine biosynthetic process;amine metabolic process;aspartate family amino acid biosynthetic process;aspartate family amino acid metabolic process;biosynthetic process;branched chain family amino acid biosynthetic process;branched chain family amino acid metabolic process;carboxylic acid biosynthetic process;carboxylic acid metabolic process;cellular amine metabolic process;cellular amino acid bio…	aspartate-semialdehyde dehydrogenase activity;binding;catalytic activity;coenzyme binding;cofactor binding;N-acetyl-gamma-glutamyl-phosphate reductase activity;NAD binding;NADP binding;nucleotide binding;oxidoreductase activity;oxidoreductase activity, acting on the aldehyde or oxo group of donors;oxidoreductase activity, acting on the aldehyde or oxo group of donors, NAD or NADP as acceptor	cell part;cytoplasm;intracellular part	Amino-acidbiosynthesis;Completeproteome;Diaminopimelatebiosynthesis;Lysinebiosynthesis;Methioninebiosynthesis;NADP;Oxidoreductase;Referenceproteome;Threoninebiosynthesis	Aspartate-semialdehyde dehydrogenase	7	42.9	39.877	0	143.56	26.1693	26.1989	25.7274	25.6351	25.9121	24.4825	24.2188	24.2104	23.8197	23.3431	22.9398	23.3825
2.54991	-0.934333	A6TFB3	uspA	response to stimulus;response to stress		cell part;cytoplasm;intracellular part	Completeproteome;Cytoplasm;Referenceproteome	Universal stress protein	3	54.5	16.181	0	59.256	24.0824	23.4419	24.2593	24.1291	24.2822	23.2376	23.7326	24.0393	22.8891	23.0435	23.0621	23.1806
3.18458	-2.70137	A6TFB6	prlC		catalytic activity;endopeptidase activity;hydrolase activity;metalloendopeptidase activity;metallopeptidase activity;peptidase activity;peptidase activity, acting on L-amino acid peptides		Completeproteome;Hydrolase;Metalloprotease;Protease;Referenceproteome;Zinc		6	11.5	76.703	0	36.661	25.0107	25.2691	25.3078	24.9606	25.1757	22.4132	22.9744	22.6117	21.4754	22.0416	23.1903	23.0353
2.7636	-2.18987	A6TFH4	glyS	amine metabolic process;amino acid activation;arginyl-tRNA aminoacylation;carboxylic acid metabolic process;cellular amine metabolic process;cellular amino acid metabolic process;cellular ketone metabolic process;cellular macromolecule metabolic process;cellular metabolic process;cellular nitrogen compound metabolic process;cellular process;glycyl-tRNA aminoacylation;macromolecule metabolic proce…	adenyl nucleotide binding;adenyl ribonucleotide binding;aminoacyl-tRNA ligase activity;arginine-tRNA ligase activity;ATP binding;binding;catalytic activity;glycine-tRNA ligase activity;ligase activity;ligase activity, forming aminoacyl-tRNA and related compounds;ligase activity, forming carbon-oxygen bonds;nucleotide binding;purine nucleotide binding;purine ribonucleoside triphosphate binding;pur…	cell part;cytoplasm;intracellular part	Aminoacyl-tRNAsynthetase;ATP-binding;Completeproteome;Cytoplasm;Ligase;Nucleotide-binding;Proteinbiosynthesis;Referenceproteome	Glycine--tRNA ligase beta subunit	4	9.1	76.33	0	26.316	24.6303	25.0273	24.3422	23.7378	23.85	23.5548	22.8774	22.6556	22.0454	23.143	21.7813	22.0083
4.24531	-2.83355	A6TFK4	secB	cellular component assembly;cellular component organization;cellular component organization or biogenesis;cellular macromolecule metabolic process;cellular metabolic process;cellular process;cellular protein metabolic process;establishment of localization;establishment of protein localization;macromolecular complex assembly;macromolecular complex subunit organization;macromolecule metabolic proce…		cell part;cytoplasm;intracellular part	Chaperone;Completeproteome;Cytoplasm;Proteintransport;Referenceproteome;Translocation;Transport	Protein-export protein SecB	3	45.2	17.19	0	135.06	26.3362	25.5979	25.2476	25.3756	25.0808	25.2971	23.2573	25.2272	23.2218	22.5712	22.6815	22.7487
2.21625	-1.28918	A6TFM8	rpmB	biosynthetic process;cellular biosynthetic process;cellular macromolecule biosynthetic process;cellular macromolecule metabolic process;cellular metabolic process;cellular process;cellular protein metabolic process;macromolecule biosynthetic process;macromolecule metabolic process;metabolic process;primary metabolic process;protein metabolic process;translation	structural constituent of ribosome;structural molecule activity	cell part;cytoplasmic part;intracellular non-membrane-bounded organelle;intracellular organelle;intracellular part;macromolecular complex;non-membrane-bounded organelle;organelle;ribonucleoprotein complex;ribosome	Completeproteome;Referenceproteome;Ribonucleoprotein;Ribosomalprotein	50S ribosomal protein L28	3	24.4	9.0064	0	17.201	24.4833	24.3068	24.2791	25.0045	24.26	24.2536	23.4348	23.7072	22.6828	23.4762	22.921	23.837
3.84882	2.63793	A6TFP8	rpoZ	biosynthetic process;cellular biosynthetic process;cellular macromolecule biosynthetic process;cellular macromolecule metabolic process;cellular metabolic process;cellular nitrogen compound metabolic process;cellular process;macromolecule biosynthetic process;macromolecule metabolic process;metabolic process;nitrogen compound metabolic process;nucleic acid metabolic process;nucleobase-containing …	binding;catalytic activity;DNA binding;DNA-directed RNA polymerase activity;nucleic acid binding;nucleotidyltransferase activity;RNA polymerase activity;transferase activity;transferase activity, transferring phosphorus-containing groups		Completeproteome;DNA-directedRNApolymerase;Nucleotidyltransferase;Referenceproteome;Transcription;Transferase	DNA-directed RNA polymerase subunit omega	3	53.8	10.236	0	41.371	21.4065	21.7049	22.1655	21.6609	22.6309	25.2516	24.4065	23.5795	24.9257	24.5443	23.6581	24.3615
2.19629	-1.28019	A6TFQ9	sbp		active transmembrane transporter activity;anion transmembrane transporter activity;anion transmembrane-transporting ATPase activity;ATPase activity;ATPase activity, coupled;ATPase activity, coupled to movement of substances;ATPase activity, coupled to transmembrane movement of ions;ATPase activity, coupled to transmembrane movement of substances;catalytic activity;hydrolase activity;hydrolase act…	cell part;external encapsulating structure part;outer membrane-bounded periplasmic space;periplasmic space	Completeproteome;Referenceproteome		14	58.4	36.575	0	323.31	29.5457	29.1091	28.9367	29.146	28.7992	28.7579	28.6368	28.2606	28.144	28.2512	28.1682	27.0534
3.3275	-1.72053	A6TFR0	zapB	asexual reproduction;barrier septum formation;cellular component assembly;cellular component assembly at cellular level;cellular component organization;cellular component organization at cellular level;cellular component organization or biogenesis;cellular component organization or biogenesis at cellular level;cellular process;cytokinesis;cytokinesis by binary fission;cytokinetic process;establis…		cell part;cytoplasm;intracellular part;membrane	Cellcycle;Celldivision;Coiledcoil;Completeproteome;Cytoplasm;Referenceproteome;Septation	Cell division protein ZapB	2	44.4	9.5567	0	21.448	24.7649	24.4677	24.775	24.7151	24.2921	24.2187	24.898	24.9752	23.309	22.7211	23.4083	22.4021
1.85212	-2.03644	A6TG33	glmS	amine metabolic process;carbohydrate metabolic process;carboxylic acid metabolic process;cellular amine metabolic process;cellular amino acid metabolic process;cellular ketone metabolic process;cellular metabolic process;cellular nitrogen compound metabolic process;cellular process;glutamine family amino acid metabolic process;glutamine metabolic process;metabolic process;nitrogen compound metabo…	binding;carbohydrate binding;catalytic activity;glutamine-fructose-6-phosphate transaminase (isomerizing) activity;transaminase activity;transferase activity;transferase activity, transferring nitrogenous groups	cell part;cytoplasm;intracellular part	Aminotransferase;Completeproteome;Cytoplasm;Glutamineamidotransferase;Referenceproteome;Transferase	Glutamine--fructose-6-phosphate aminotransferase [isomerizing]	7	23.3	66.843	0	137.16	26.1104	25.7105	25.1308	25.7571	26.1215	22.1409	22.6093	25.638	23.7266	25.0908	23.3521	22.3936
2.58132	-2.76676	A6TG36	atpD	ATP biosynthetic process;ATP hydrolysis coupled proton transport;ATP metabolic process;ATP synthesis coupled proton transport;biosynthetic process;cation transport;cellular biosynthetic process;cellular metabolic process;cellular nitrogen compound biosynthetic process;cellular nitrogen compound metabolic process;cellular process;energy coupled proton transport, against electrochemical gradient;en…	adenyl nucleotide binding;adenyl ribonucleotide binding;ATP binding;binding;cation transmembrane transporter activity;hydrogen ion transmembrane transporter activity;hydrogen ion transporting ATP synthase activity, rotational mechanism;inorganic cation transmembrane transporter activity;ion transmembrane transporter activity;monovalent inorganic cation transmembrane transporter activity;nucleotid…	cell part;intracellular part;macromolecular complex;membrane;membrane part;plasma membrane;protein complex;proton-transporting ATP synthase complex, catalytic core F(1);proton-transporting two-sector ATPase complex, catalytic domain	ATP-binding;ATPsynthesis;Cellinnermembrane;Cellmembrane;CF(1);Completeproteome;Hydrogeniontransport;Hydrolase;Iontransport;Membrane;Nucleotide-binding;Referenceproteome;Transport	ATP synthase subunit beta	21	65.4	50.21	0	323.31	27.7849	27.8646	27.6931	27.6188	27.3517	27.1396	25.5776	27.2063	24.7283	25.1913	23.6397	26.3351
1.05662	-1.61265	A6TG37	atpG	ATP biosynthetic process;ATP metabolic process;ATP synthesis coupled proton transport;biosynthetic process;cation transport;cellular biosynthetic process;cellular metabolic process;cellular nitrogen compound biosynthetic process;cellular nitrogen compound metabolic process;cellular process;energy coupled proton transport, down electrochemical gradient;establishment of localization;heterocycle bio…	active transmembrane transporter activity;adenyl nucleotide binding;adenyl ribonucleotide binding;ATP binding;ATPase activity;ATPase activity, coupled;ATPase activity, coupled to movement of substances;ATPase activity, coupled to transmembrane movement of ions;ATPase activity, coupled to transmembrane movement of substances;binding;catalytic activity;cation transmembrane transporter activity;cati…	cell part;intracellular part;macromolecular complex;membrane;membrane part;plasma membrane;protein complex;proton-transporting ATP synthase complex, catalytic core F(1);proton-transporting two-sector ATPase complex, catalytic domain	ATPsynthesis;Cellinnermembrane;Cellmembrane;CF(1);Completeproteome;Hydrogeniontransport;Iontransport;Membrane;Referenceproteome;Transport	ATP synthase gamma chain	4	27.2	31.513	0	76.977	25.3335	25.0659	22.4597	24.7285	21.9403	23.9093	23.2852	24.5101	22.0508	23.5605	23.5342	21.9915
2.32796	-3.95797	A6TG38	atpA	ATP biosynthetic process;ATP hydrolysis coupled proton transport;ATP metabolic process;ATP synthesis coupled proton transport;biosynthetic process;cation transport;cellular biosynthetic process;cellular metabolic process;cellular nitrogen compound biosynthetic process;cellular nitrogen compound metabolic process;cellular process;energy coupled proton transport, against electrochemical gradient;en…	active transmembrane transporter activity;adenyl nucleotide binding;adenyl ribonucleotide binding;ATP binding;ATPase activity;ATPase activity, coupled;ATPase activity, coupled to movement of substances;ATPase activity, coupled to transmembrane movement of ions;ATPase activity, coupled to transmembrane movement of substances;binding;catalytic activity;cation transmembrane transporter activity;cati…	cell part;intracellular part;macromolecular complex;membrane;membrane part;plasma membrane;protein complex;proton-transporting ATP synthase complex, catalytic core F(1);proton-transporting two-sector ATPase complex, catalytic domain	ATP-binding;ATPsynthesis;Cellinnermembrane;Cellmembrane;CF(1);Completeproteome;Hydrogeniontransport;Hydrolase;Iontransport;Membrane;Nucleotide-binding;Referenceproteome;Transport	ATP synthase subunit alpha	18	47	55.168	0	323.31	29.1364	28.5603	28.7094	28.2799	27.9209	27.1224	27.5543	26.5731	26.5241	23.7477	22.7299	25.8524
3.34378	-2.55673	A6TG73	glnA	amine biosynthetic process;amine metabolic process;biosynthetic process;carboxylic acid biosynthetic process;carboxylic acid metabolic process;cellular amine metabolic process;cellular amino acid biosynthetic process;cellular amino acid metabolic process;cellular biosynthetic process;cellular ketone metabolic process;cellular metabolic process;cellular nitrogen compound biosynthetic process;cellu…	acid-ammonia (or amide) ligase activity;adenyl nucleotide binding;adenyl ribonucleotide binding;ammonia ligase activity;ATP binding;binding;catalytic activity;glutamate-ammonia ligase activity;ligase activity;ligase activity, forming carbon-nitrogen bonds;nucleotide binding;purine nucleotide binding;purine ribonucleoside triphosphate binding;purine ribonucleotide binding;ribonucleotide binding	cell part;cytoplasm;intracellular part	ATP-binding;Completeproteome;Ligase;Nucleotide-binding;Referenceproteome	Glutamine synthetase	9	33	50.983	0	179.82	26.1079	26.2492	26.0149	25.8952	25.8733	22.7492	23.4683	25.2151	23.6405	23.821	24.115	22.4638
2.04566	-1.68741	A6TGB2	sodA		antioxidant activity;binding;catalytic activity;cation binding;ion binding;metal ion binding;oxidoreductase activity;oxidoreductase activity, acting on superoxide radicals as acceptor;superoxide dismutase activity		Completeproteome;Oxidoreductase;Referenceproteome	Superoxide dismutase	5	37.6	23.489	0	323.31	28.1247	28.4361	28.6136	28.3705	28.2021	27.9392	27.6179	26.8248	26.7647	27.6295	26.8641	25.5371
1.2352	-1.38117	A6TGB8	pfkA	alcohol catabolic process;alcohol metabolic process;carbohydrate catabolic process;carbohydrate metabolic process;catabolic process;cellular carbohydrate catabolic process;cellular carbohydrate metabolic process;cellular metabolic process;cellular process;fructose 6-phosphate metabolic process;fructose metabolic process;generation of precursor metabolites and energy;glucose catabolic process;gluc…	6-phosphofructokinase activity;adenyl nucleotide binding;adenyl ribonucleotide binding;ATP binding;binding;carbohydrate kinase activity;catalytic activity;cation binding;ion binding;kinase activity;metal ion binding;nucleotide binding;phosphofructokinase activity;phosphotransferase activity, alcohol group as acceptor;purine nucleotide binding;purine ribonucleoside triphosphate binding;purine ribo…	cell part;cytoplasm;intracellular part	Allostericenzyme;ATP-binding;Completeproteome;Cytoplasm;Glycolysis;Kinase;Magnesium;Metal-binding;Nucleotide-binding;Referenceproteome;Transferase	ATP-dependent 6-phosphofructokinase	6	34.7	34.984	0	97.579	24.9294	24.647	25.2882	25.9366	25.3382	26.0758	26.4153	25.7341	23.4314	24.5698	24.7527	22.5225
3.42649	-3.62101	A6TGC2	hslV	macromolecule metabolic process;metabolic process;primary metabolic process;protein metabolic process;proteolysis;proteolysis involved in cellular protein catabolic process	binding;catalytic activity;cation binding;endopeptidase activity;hydrolase activity;ion binding;metal ion binding;peptidase activity;peptidase activity, acting on L-amino acid peptides;threonine-type endopeptidase activity;threonine-type peptidase activity	cell part;cytoplasmic part;HslUV protease complex;intracellular part;macromolecular complex;proteasome core complex;protein complex	Allostericenzyme;Completeproteome;Cytoplasm;Hydrolase;Metal-binding;Protease;Referenceproteome;Sodium;Threonineprotease	ATP-dependent protease subunit HslV	2	23.3	19	0	39.064	25.4639	26.8734	26.457	26.3232	26.0871	26.3588	23.7793	22.6002	22.01	23.3505	21.889	23.384
1.14392	-1.96108	A6TGC8	metB		binding;catalytic activity;cofactor binding;pyridoxal phosphate binding;vitamin B6 binding;vitamin binding		Completeproteome;Pyridoxalphosphate;Referenceproteome		7	36.5	41.528	0	291.48	27.0527	26.9117	26.5776	26.6649	27.0413	26.2919	25.6309	26.7138	25.5878	22.9493	23.8712	26.9543
3.48813	-3.03585	A6TGC9	metL	amine biosynthetic process;amine metabolic process;aspartate family amino acid biosynthetic process;aspartate family amino acid metabolic process;biosynthetic process;carboxylic acid biosynthetic process;carboxylic acid metabolic process;cellular amine metabolic process;cellular amino acid biosynthetic process;cellular amino acid metabolic process;cellular biosynthetic process;cellular ketone met…	amino acid kinase activity;aspartate kinase activity;binding;catalytic activity;coenzyme binding;cofactor binding;homoserine dehydrogenase activity;kinase activity;NADP binding;nucleotide binding;oxidoreductase activity;oxidoreductase activity, acting on CH-OH group of donors;oxidoreductase activity, acting on the CH-OH group of donors, NAD or NADP as acceptor;phosphotransferase activity, carboxy…		Completeproteome;Kinase;Referenceproteome;Transferase		8	18.6	88.713	0	115.08	26.196	25.9434	26.2401	25.2273	24.5343	25.663	22.6243	25.5069	22.7382	23.8403	22.6241	22.2607
1.23478	-1.06379	A6TGD4	metF	amine biosynthetic process;amine metabolic process;aspartate family amino acid biosynthetic process;aspartate family amino acid metabolic process;biosynthetic process;carboxylic acid biosynthetic process;carboxylic acid metabolic process;cellular amine metabolic process;cellular amino acid biosynthetic process;cellular amino acid metabolic process;cellular aromatic compound metabolic process;cell…	catalytic activity;methylenetetrahydrofolate reductase (NADPH) activity;oxidoreductase activity;oxidoreductase activity, acting on the CH-NH group of donors;oxidoreductase activity, acting on the CH-NH group of donors, NAD or NADP as acceptor	cell part;cytoplasmic part;cytosol;intracellular part	Amino-acidbiosynthesis;Completeproteome;FAD;Flavoprotein;Oxidoreductase;Referenceproteome	Methylenetetrahydrofolate reductase	7	31.2	33.116	0	52.581	25.3601	25.0956	24.7649	25.0625	24.8133	25.2295	26.3893	26.3639	24.7493	24.0128	22.7722	24.4937
2.93353	-2.64425	A6TGE0	ppc	acetyl-CoA catabolic process;acetyl-CoA metabolic process;carbon fixation;carboxylic acid metabolic process;catabolic process;cellular catabolic process;cellular ketone metabolic process;cellular metabolic process;cellular process;coenzyme catabolic process;coenzyme metabolic process;cofactor catabolic process;cofactor metabolic process;dicarboxylic acid metabolic process;metabolic process;organi…	binding;carbon-carbon lyase activity;carboxy-lyase activity;catalytic activity;cation binding;ion binding;lyase activity;magnesium ion binding;metal ion binding;phosphoenolpyruvate carboxykinase activity;phosphoenolpyruvate carboxylase activity		Carbondioxidefixation;Completeproteome;Lyase;Magnesium;Pyruvate;Referenceproteome	Phosphoenolpyruvate carboxylase	11	23	99.932	0	103.56	25.8141	25.8998	25.1388	24.7389	24.5902	24.0206	23.1117	25.1223	22.7227	23.5281	22.9744	21.7894
2.59525	1.07146	A6TGE2	argC	amine biosynthetic process;amine metabolic process;arginine biosynthetic process;arginine metabolic process;biosynthetic process;carboxylic acid biosynthetic process;carboxylic acid metabolic process;cellular amine metabolic process;cellular amino acid biosynthetic process;cellular amino acid metabolic process;cellular biosynthetic process;cellular ketone metabolic process;cellular metabolic proc…	binding;catalytic activity;coenzyme binding;cofactor binding;N-acetyl-gamma-glutamyl-phosphate reductase activity;NAD binding;nucleotide binding;oxidoreductase activity;oxidoreductase activity, acting on the aldehyde or oxo group of donors;oxidoreductase activity, acting on the aldehyde or oxo group of donors, NAD or NADP as acceptor	cell part;cytoplasm;intracellular part	Amino-acidbiosynthesis;Argininebiosynthesis;Completeproteome;Cytoplasm;NADP;Oxidoreductase;Referenceproteome	N-acetyl-gamma-glutamyl-phosphate reductase	2	10.2	35.815	0	12.177	22.2877	21.9892	22.3689	22.2642	23.5204	22.8878	23.5042	22.1762	23.6454	23.04	23.6335	22.877
1.64746	-2.1125	A6TGF3	yifE				Completeproteome;Referenceproteome		2	17	13.153	0	142.49	25.0539	25.5298	26.4971	26.0974	26.1897	25.333	26.2772	26.5473	25.437	23.6148	22.9879	22.6885
1.7936	-1.7197	A6TGF7	ilvE	amine metabolic process;branched chain family amino acid metabolic process;carboxylic acid metabolic process;cellular amine metabolic process;cellular amino acid metabolic process;cellular ketone metabolic process;cellular metabolic process;cellular nitrogen compound metabolic process;cellular process;metabolic process;nitrogen compound metabolic process;organic acid metabolic process;oxoacid met…	branched-chain-amino-acid transaminase activity;catalytic activity;transaminase activity;transferase activity;transferase activity, transferring nitrogenous groups		Aminotransferase;Completeproteome;Pyridoxalphosphate;Referenceproteome;Transferase		6	35.6	33.912	0	73.457	24.6545	24.9508	24.7871	25.2892	25.489	24.9014	25.2197	25.4624	24.5592	22.3241	23.3284	22.5911
1.87971	-2.24657	A6TGG1	ilvC	amine biosynthetic process;amine metabolic process;biosynthetic process;branched chain family amino acid biosynthetic process;branched chain family amino acid metabolic process;carboxylic acid biosynthetic process;carboxylic acid metabolic process;cellular amine metabolic process;cellular amino acid biosynthetic process;cellular amino acid metabolic process;cellular biosynthetic process;cellular …	binding;catalytic activity;coenzyme binding;cofactor binding;ketol-acid reductoisomerase activity;oxidoreductase activity;oxidoreductase activity, acting on CH-OH group of donors;oxidoreductase activity, acting on the CH-OH group of donors, NAD or NADP as acceptor		Amino-acidbiosynthesis;Branched-chainaminoacidbiosynthesis;Completeproteome;NADP;Oxidoreductase;Referenceproteome	Ketol-acid reductoisomerase	17	55.4	53.951	0	323.31	28.8029	28.909	29.0531	29.002	28.4374	28.3586	27.7767	27.9707	27.6977	27.2941	26.9732	24.8157
3.13844	-0.977519	A6TGH0	trxA	biological regulation;cell redox homeostasis;cellular homeostasis;cellular process;glycerol ether metabolic process;homeostatic process;metabolic process;organic ether metabolic process;regulation of biological process;regulation of biological quality;regulation of cellular process;small molecule metabolic process	catalytic activity;disulfide oxidoreductase activity;oxidoreductase activity;oxidoreductase activity, acting on a sulfur group of donors;protein disulfide oxidoreductase activity		Completeproteome;Referenceproteome	Thioredoxin	4	56	11.851	0	132.73	26.0596	26.2695	25.9039	26.2525	26.0012	25.5441	27.029	25.3323	24.8878	25.3229	24.9639	25.4007
1.50423	-2.67033	A6TGK9	metE	amine biosynthetic process;amine metabolic process;aspartate family amino acid biosynthetic process;aspartate family amino acid metabolic process;biosynthetic process;carboxylic acid biosynthetic process;carboxylic acid metabolic process;cellular amine metabolic process;cellular amino acid biosynthetic process;cellular amino acid metabolic process;cellular biosynthetic process;cellular ketone met…	5-methyltetrahydropteroyltriglutamate-homocysteine S-methyltransferase activity;5-methyltetrahydropteroyltri-L-glutamate-dependent methyltransferase activity;binding;catalytic activity;cation binding;ion binding;metal ion binding;methyltransferase activity;S-methyltransferase activity;transferase activity;transferase activity, transferring one-carbon groups;transition metal ion binding;zinc ion b…		Amino-acidbiosynthesis;Completeproteome;Metal-binding;Methioninebiosynthesis;Methyltransferase;Referenceproteome;Repeat;Transferase;Zinc	5-methyltetrahydropteroyltriglutamate--homocysteine methyltransferase	19	46.6	84.503	0	323.31	28.3363	28.2253	28.0955	27.9065	27.4443	26.5928	26.2442	27.3171	26.208	23.9975	23.8564	27.8204
1.03146	-1.23038	A6TGL1	udp	biosynthetic process;catabolic process;cellular biosynthetic process;cellular catabolic process;cellular metabolic compound salvage;cellular metabolic process;cellular nitrogen compound biosynthetic process;cellular nitrogen compound catabolic process;cellular nitrogen compound metabolic process;cellular process;heterocycle biosynthetic process;heterocycle metabolic process;metabolic process;nitr…	catalytic activity;transferase activity;transferase activity, transferring glycosyl groups;transferase activity, transferring pentosyl groups;uridine phosphorylase activity	cell part;cytoplasm;intracellular part	Completeproteome;Glycosyltransferase;Referenceproteome;Transferase	Uridine phosphorylase	2	21.7	27.053	0	48.996	24.3173	24.0745	22.3695	24.9951	22.892	22.5876	25.0029	22.638	22.2025	23.1813	22.3122	23.139
2.27603	1.55013	A6TGN5	rplK	biosynthetic process;cellular biosynthetic process;cellular macromolecule biosynthetic process;cellular macromolecule metabolic process;cellular metabolic process;cellular process;cellular protein metabolic process;macromolecule biosynthetic process;macromolecule metabolic process;metabolic process;primary metabolic process;protein metabolic process;translation	binding;LSU rRNA binding;nucleic acid binding;RNA binding;rRNA binding;structural constituent of ribosome;structural molecule activity	cell part;cytoplasmic part;intracellular non-membrane-bounded organelle;intracellular organelle;intracellular part;macromolecular complex;non-membrane-bounded organelle;organelle;ribonucleoprotein complex;ribosome	Completeproteome;Methylation;Referenceproteome;Ribonucleoprotein;Ribosomalprotein;RNA-binding;rRNA-binding	50S ribosomal protein L11	3	26.8	14.875	0	301.26	24.4298	24.1951	24.7842	24.208	25.0947	25.9666	24.927	24.8326	25.7362	26.1333	26.7734	25.1746
2.03363	1.02447	A6TGN6	rplA	biological regulation;biosynthetic process;cellular biosynthetic process;cellular macromolecule biosynthetic process;cellular macromolecule metabolic process;cellular metabolic process;cellular process;cellular protein metabolic process;macromolecule biosynthetic process;macromolecule metabolic process;metabolic process;posttranscriptional regulation of gene expression;primary metabolic process;p…	binding;nucleic acid binding;RNA binding;rRNA binding;structural constituent of ribosome;structural molecule activity;tRNA binding	cell part;intracellular organelle part;intracellular part;large ribosomal subunit;macromolecular complex;organelle part;ribonucleoprotein complex	Completeproteome;Referenceproteome;Repressor;Ribonucleoprotein;Ribosomalprotein;RNA-binding;rRNA-binding;Translationregulation;tRNA-binding	50S ribosomal protein L1	11	55.1	24.744	0	323.31	27.4608	27.3496	27.7634	27.6657	27.7945	28.0491	28.0876	27.2843	28.4778	27.9068	28.9818	28.9711
1.67635	-2.68218	A6TGP0	rpoB	biosynthetic process;cellular biosynthetic process;cellular macromolecule biosynthetic process;cellular macromolecule metabolic process;cellular metabolic process;cellular nitrogen compound metabolic process;cellular process;macromolecule biosynthetic process;macromolecule metabolic process;metabolic process;nitrogen compound metabolic process;nucleic acid metabolic process;nucleobase-containing …	binding;catalytic activity;DNA binding;DNA-directed RNA polymerase activity;nucleic acid binding;nucleoside binding;nucleotidyltransferase activity;ribonucleoside binding;RNA polymerase activity;transferase activity;transferase activity, transferring phosphorus-containing groups		Completeproteome;DNA-directedRNApolymerase;Nucleotidyltransferase;Referenceproteome;Transcription;Transferase	DNA-directed RNA polymerase subunit beta	23	32.9	150.51	0	323.31	27.6115	27.4606	26.6251	27.1331	27.1568	26.026	25.3043	26.218	24.4001	24.154	22.7583	26.7892
0.77055	-1.4746	A6TGP1	rpoC	biosynthetic process;cellular biosynthetic process;cellular macromolecule biosynthetic process;cellular macromolecule metabolic process;cellular metabolic process;cellular nitrogen compound metabolic process;cellular process;macromolecule biosynthetic process;macromolecule metabolic process;metabolic process;nitrogen compound metabolic process;nucleic acid metabolic process;nucleobase-containing …	binding;catalytic activity;DNA binding;DNA-directed RNA polymerase activity;nucleic acid binding;nucleotidyltransferase activity;RNA polymerase activity;transferase activity;transferase activity, transferring phosphorus-containing groups		Completeproteome;DNA-directedRNApolymerase;Nucleotidyltransferase;Referenceproteome;Transcription;Transferase	DNA-directed RNA polymerase subunit beta'	24	25.7	155.26	0	323.31	27.4112	27.5809	27.0394	27.442	27.4505	26.7423	28.2553	26.7371	26.2274	26.6773	23.1901	27.4802
2.46956	-2.45382	A6TGP7	thiG	aromatic compound biosynthetic process;biosynthetic process;cellular aromatic compound metabolic process;cellular biosynthetic process;cellular metabolic process;cellular nitrogen compound biosynthetic process;cellular nitrogen compound metabolic process;cellular process;coenzyme biosynthetic process;coenzyme metabolic process;cofactor biosynthetic process;cofactor metabolic process;heterocycle b…	catalytic activity;sulfurtransferase activity;transferase activity;transferase activity, transferring sulfur-containing groups	cell part;cytoplasm;intracellular part	Completeproteome;Cytoplasm;Referenceproteome;Schiffbase;Thiaminebiosynthesis;Transferase	Thiazole synthase	7	42.2	26.786	0	74.707	26.0823	25.8641	25.5557	25.6623	25.5497	25.0347	24.7045	25.2301	24.7368	23.4415	22.7175	22.4533
1.08037	-1.62122	A6TGQ0	thiE	aromatic compound biosynthetic process;biosynthetic process;cellular aromatic compound metabolic process;cellular biosynthetic process;cellular metabolic process;cellular nitrogen compound biosynthetic process;cellular nitrogen compound metabolic process;cellular process;coenzyme biosynthetic process;coenzyme metabolic process;cofactor biosynthetic process;cofactor metabolic process;heterocycle b…	binding;catalytic activity;cation binding;ion binding;magnesium ion binding;metal ion binding;thiamine-phosphate diphosphorylase activity;transferase activity;transferase activity, transferring alkyl or aryl (other than methyl) groups		Completeproteome;Magnesium;Metal-binding;Referenceproteome;Thiaminebiosynthesis;Transferase	Thiamine-phosphate synthase	10	76.8	23.015	0	321.16	28.6464	28.8767	28.7619	28.7068	28.9132	28.5858	27.3383	28.4805	27.8874	28.8999	26.2789	25.4408
5.2376	-2.32777	A6TGQ1	thiC	aromatic compound biosynthetic process;biosynthetic process;cellular aromatic compound metabolic process;cellular biosynthetic process;cellular metabolic process;cellular nitrogen compound biosynthetic process;cellular nitrogen compound metabolic process;cellular process;coenzyme biosynthetic process;coenzyme metabolic process;cofactor biosynthetic process;cofactor metabolic process;heterocycle b…	4 iron, 4 sulfur cluster binding;binding;catalytic activity;cation binding;ion binding;iron-sulfur cluster binding;lyase activity;metal cluster binding;metal ion binding;transition metal ion binding;zinc ion binding		4Fe-4S;Completeproteome;Iron;Iron-sulfur;Lyase;Metal-binding;Referenceproteome;S-adenosyl-L-methionine;Thiaminebiosynthesis;Zinc	Phosphomethylpyrimidine synthase	10	21.4	70.784	0	59.096	25.9281	25.5563	25.5454	25.322	24.9064	23.7469	23.7091	24.9686	23.0979	23.2052	23.2086	23.5289
2.65208	2.07047	A6TGQ7	hupA	cellular component organization;cellular component organization at cellular level;cellular component organization or biogenesis;cellular component organization or biogenesis at cellular level;cellular macromolecule metabolic process;cellular metabolic process;cellular nitrogen compound metabolic process;cellular process;chromosome condensation;chromosome organization;DNA conformation change;DNA m…	binding;DNA binding;nucleic acid binding		Completeproteome;DNA-binding;DNAcondensation;Referenceproteome		5	63.3	9.4768	0	323.31	28.5964	28.7933	29.6961	29.6898	29.5447	30.4624	29.7623	30.2325	31.0828	30.5807	31.485	31.909
3.03697	-2.92902	A6TGR5	metA	amine biosynthetic process;amine metabolic process;aspartate family amino acid biosynthetic process;aspartate family amino acid metabolic process;biosynthetic process;carboxylic acid biosynthetic process;carboxylic acid metabolic process;cellular amine metabolic process;cellular amino acid biosynthetic process;cellular amino acid metabolic process;cellular biosynthetic process;cellular ketone met…	catalytic activity;homoserine O-succinyltransferase activity;O-acyltransferase activity;O-succinyltransferase activity;succinyltransferase activity;transferase activity;transferase activity, transferring acyl groups;transferase activity, transferring acyl groups other than amino-acyl groups	cell part;cytoplasm;intracellular part	Acyltransferase;Amino-acidbiosynthesis;Completeproteome;Cytoplasm;Methioninebiosynthesis;Referenceproteome;Transferase	Homoserine O-succinyltransferase	6	32	35.692	0	136.61	25.736	26.0606	25.6417	25.4609	25.4477	25.8651	22.5153	24.7417	21.9884	22.3094	24.1105	22.7747
2.66722	-1.86576	A6TGS0	metH	cellular aromatic compound metabolic process;cellular metabolic process;cellular process;heterocycle metabolic process;metabolic process;nitrogen compound metabolic process;pteridine-containing compound metabolic process	5-methyltetrahydrofolate-dependent methyltransferase activity;binding;catalytic activity;cation binding;cobalamin binding;homocysteine S-methyltransferase activity;ion binding;metal ion binding;methionine synthase activity;methyltransferase activity;S-adenosylmethionine-dependent methyltransferase activity;S-methyltransferase activity;tetrapyrrole binding;transferase activity;transferase activity…	cell part;intracellular	Cobalt;Completeproteome;Metal-binding;Referenceproteome;Zinc		8	10.4	135.75	0	62.312	24.2696	24.6946	24.0582	24.6033	24.5467	23.9111	23.5107	24.2217	21.5971	22.8138	23.135	22.6168
1.81788	-1.11806	A6TGT3	lysC	amine biosynthetic process;amine metabolic process;aspartate family amino acid biosynthetic process;aspartate family amino acid metabolic process;biosynthetic process;carboxylic acid biosynthetic process;carboxylic acid metabolic process;cellular amine metabolic process;cellular amino acid biosynthetic process;cellular amino acid metabolic process;cellular biosynthetic process;cellular ketone met…	amine binding;amino acid binding;amino acid kinase activity;aspartate kinase activity;binding;carboxylic acid binding;catalytic activity;kinase activity;phosphotransferase activity, carboxyl group as acceptor;transferase activity;transferase activity, transferring phosphorus-containing groups		Completeproteome;Kinase;Referenceproteome;Transferase	Aspartokinase	3	13.1	48.431	0	41.07	24.1017	23.7601	23.5861	23.8692	22.4627	23.6313	22.8688	22.5624	23.1196	23.3754	22.1247	22.2252
3.21577	-3.52525	A6TGT4	pgi	alcohol biosynthetic process;alcohol catabolic process;alcohol metabolic process;biosynthetic process;carbohydrate biosynthetic process;carbohydrate catabolic process;carbohydrate metabolic process;catabolic process;cellular biosynthetic process;cellular carbohydrate biosynthetic process;cellular carbohydrate catabolic process;cellular carbohydrate metabolic process;cellular metabolic process;cel…	catalytic activity;glucose-6-phosphate isomerase activity;intramolecular oxidoreductase activity;intramolecular oxidoreductase activity, interconverting aldoses and ketoses;isomerase activity	cell part;cytoplasm;intracellular part	Completeproteome;Cytoplasm;Gluconeogenesis;Glycolysis;Isomerase;Referenceproteome	Glucose-6-phosphate isomerase	14	40.3	61.328	0	323.31	27.3359	27.3535	26.363	27.3064	26.3971	25.909	25.7987	25.8065	23.6394	24.745	22.3941	23.4793
2.28792	-1.00143	A6TH53	groL	cellular macromolecule metabolic process;cellular metabolic process;cellular process;cellular protein metabolic process;macromolecule metabolic process;metabolic process;primary metabolic process;protein folding;protein metabolic process;protein refolding	adenyl nucleotide binding;adenyl ribonucleotide binding;ATP binding;binding;nucleotide binding;purine nucleotide binding;purine ribonucleoside triphosphate binding;purine ribonucleotide binding;ribonucleotide binding	cell part;cytoplasm;intracellular part	ATP-binding;Chaperone;Completeproteome;Cytoplasm;Nucleotide-binding;Referenceproteome	60 kDa chaperonin	30	79.7	57.125	0	323.31	32.3667	32.0386	31.9025	31.9802	32.0541	31.5314	31.2047	31.6101	31.3637	31.4963	30.6707	30.7514
1.88957	-1.25258	A6THD2	msrA	cellular macromolecule metabolic process;cellular metabolic process;cellular process;cellular protein metabolic process;macromolecule metabolic process;macromolecule modification;metabolic process;primary metabolic process;protein metabolic process;protein modification process;protein repair;response to chemical stimulus;response to oxidative stress;response to stimulus;response to stress	catalytic activity;oxidoreductase activity;oxidoreductase activity, acting on a sulfur group of donors;oxidoreductase activity, acting on a sulfur group of donors, disulfide as acceptor;peptide-methionine-(S)-S-oxide reductase activity		Completeproteome;Oxidoreductase;Referenceproteome	Peptide methionine sulfoxide reductase MsrA	3	28.9	25.717	0	60.678	25.1178	25.0119	24.3983	24.1406	22.6695	22.8312	23.824	22.9548	22.6601	23.4405	23.6484	23.9093
2.63198	-0.867368	A6THD8	ppa	cellular metabolic process;cellular process;metabolic process;phosphate-containing compound metabolic process;phosphorus metabolic process	binding;catalytic activity;cation binding;hydrolase activity;hydrolase activity, acting on acid anhydrides;hydrolase activity, acting on acid anhydrides, in phosphorus-containing anhydrides;inorganic diphosphatase activity;ion binding;magnesium ion binding;metal ion binding;pyrophosphatase activity	cell part;cytoplasm;intracellular part	Completeproteome;Cytoplasm;Hydrolase;Magnesium;Metal-binding;Referenceproteome	Inorganic pyrophosphatase	3	21.6	19.707	0	18.367	24.0256	23.8755	23.4138	23.5545	23.1948	23.2974	22.9098	23.5009	23.1388	22.7882	22.7026	22.7703
2.502	-1.63684	A6THE3	fbp	alcohol biosynthetic process;alcohol metabolic process;biosynthetic process;carbohydrate biosynthetic process;carbohydrate metabolic process;cellular biosynthetic process;cellular carbohydrate biosynthetic process;cellular carbohydrate metabolic process;cellular metabolic process;cellular process;gluconeogenesis;glucose metabolic process;hexose biosynthetic process;hexose metabolic process;metabo…	binding;carbohydrate phosphatase activity;catalytic activity;cation binding;fructose 1,6-bisphosphate 1-phosphatase activity;hydrolase activity;hydrolase activity, acting on ester bonds;ion binding;magnesium ion binding;metal ion binding;phosphatase activity;phosphoric ester hydrolase activity;sugar-phosphatase activity	cell part;cytoplasm;intracellular part	Carbohydratemetabolism;Completeproteome;Cytoplasm;Hydrolase;Magnesium;Metal-binding;Referenceproteome	Fructose-1,6-bisphosphatase class 1	6	29.8	36.746	0	38.596	24.4643	24.4975	24.8724	24.5098	24.3472	24.1881	23.2417	24.8125	22.0233	23.1496	23.0364	23.5874
3.52703	-2.22254	A6THH2	yjgF		catalytic activity;deaminase activity		Completeproteome;Referenceproteome		2	30.5	13.589	0	19.928	25.2474	25.1325	25.7071	25.3798	21.9235	23.1311	22.5225	22.3383	22.347	23.5349	23.29	23.4048
3.97266	-1.71578	A6TI05	yjjK		adenyl nucleotide binding;adenyl ribonucleotide binding;ATP binding;ATPase activity;binding;catalytic activity;hydrolase activity;hydrolase activity, acting on acid anhydrides;hydrolase activity, acting on acid anhydrides, in phosphorus-containing anhydrides;nucleoside-triphosphatase activity;nucleotide binding;purine nucleotide binding;purine ribonucleoside triphosphate binding;purine ribonucleo…		ATP-binding;Completeproteome;Nucleotide-binding;Referenceproteome		7	21.9	61.395	0	51.532	25.466	24.972	24.6331	24.8997	25.3142	23.5598	25.6935	25.5212	23.2358	23.3297	23.0827	23.4595
