# Supplementary material for: Iron Limitation in Klebsiella pneumoniae Defines New Roles for Lon Protease in Homeostasis and Degradation by Quantitative Proteomics
Source: Front Microbiol. 2020 Apr 24;11:546. doi: 10.3389/fmicb.2020.00546 (PMC7194016; doi:10.3389/fmicb.2020.00546)
Supplement: TABLE S3 — Significantly different proteins in cellular proteome under replete (100 μM) vs. limited conditions. [file Table_3.XLSX]

## Sheet: Sheet1
(-)log10 p-value	Difference	Protein IDs	Gene name	GOBP name	GOMF name	GOCC name	Keywords	Protein name	Peptides	Sequence coverage [%]	Mol. weight [kDa]	Q-value	Score	LFQ intensity 13	LFQ intensity 14	LFQ intensity 15	LFQ intensity 16	LFQ intensity 17	LFQ intensity 18	LFQ intensity 19	LFQ intensity 20	LFQ intensity 21	LFQ intensity 22	LFQ intensity 23	LFQ intensity 24
2.75546	-3.25415	A6T4Q7	aceE		catalytic activity;oxidoreductase activity;oxidoreductase activity, acting on the aldehyde or oxo group of donors;oxidoreductase activity, acting on the aldehyde or oxo group of donors, disulfide as acceptor;pyruvate dehydrogenase (acetyl-transferring) activity;pyruvate dehydrogenase activity		Completeproteome;Oxidoreductase;Pyruvate;Referenceproteome;Thiaminepyrophosphate	Pyruvate dehydrogenase E1 component	26	45.5	99.433	0	323.31	28.9616	28.8706	28.4092	28.4836	28.5751	27.4301	27.4241	26.924	24.9913	24.8177	24.6771	22.8507
1.29099	-2.6285	A6T4Q8	aceF	alcohol catabolic process;alcohol metabolic process;carbohydrate catabolic process;carbohydrate metabolic process;catabolic process;cellular carbohydrate catabolic process;cellular carbohydrate metabolic process;cellular metabolic process;cellular process;generation of precursor metabolites and energy;glucose catabolic process;glucose metabolic process;glycolysis;hexose catabolic process;hexose m…	acetyltransferase activity;catalytic activity;dihydrolipoamide S-acyltransferase activity;dihydrolipoyllysine-residue acetyltransferase activity;S-acetyltransferase activity;S-acyltransferase activity;transferase activity;transferase activity, transferring acyl groups;transferase activity, transferring acyl groups other than amino-acyl groups	cell part;cytoplasmic part;intracellular part;macromolecular complex;protein complex;pyruvate dehydrogenase complex	Acyltransferase;Completeproteome;Glycolysis;Lipoyl;Referenceproteome;Transferase	Acetyltransferase component of pyruvate dehydrogenase complex	16	39.7	65.915	0	323.31	27.3103	27.2194	26.4559	26.7766	26.4939	26.2462	26.7633	27.3469	25.5029	22.0041	26.2604	22.5689
2.09962	-2.00711	A6T4X2	tsf		binding;nucleic acid binding;RNA binding;translation elongation factor activity;translation factor activity, nucleic acid binding	cell part;cytoplasm;intracellular part	Completeproteome;Cytoplasm;Elongationfactor;Proteinbiosynthesis;Referenceproteome	Elongation factor Ts	10	45.2	30.45	0	131.24	27.396	27.128	27.3115	27.4698	27.2449	26.4759	27.4147	27.4842	25.9623	23.8608	25.1651	25.6029
3.4212	-2.72081	A6T650	ybdH		binding;catalytic activity;cation binding;ion binding;metal ion binding;oxidoreductase activity;oxidoreductase activity, acting on CH-OH group of donors		Completeproteome;Metal-binding;Referenceproteome;Zinc		8	35.9	38.928	0	75.697	25.4069	24.7188	24.9998	24.97	25.6712	24.6955	25.5904	25.7527	23.1811	22.551	23.1443	21.9502
1.92248	-2.3045	A6T672	mtnD	amine biosynthetic process;amine metabolic process;amino acid salvage;aspartate family amino acid biosynthetic process;aspartate family amino acid metabolic process;biosynthetic process;carboxylic acid biosynthetic process;carboxylic acid metabolic process;cellular amine metabolic process;cellular amino acid biosynthetic process;cellular amino acid metabolic process;cellular biosynthetic process;…	acireductone dioxygenase (Ni2+-requiring) activity;acireductone dioxygenase [iron(II)-requiring] activity;binding;catalytic activity;cation binding;dioxygenase activity;ion binding;iron ion binding;metal ion binding;nickel ion binding;oxidoreductase activity;oxidoreductase activity, acting on single donors with incorporation of molecular oxygen;oxidoreductase activity, acting on single donors wit…		Amino-acidbiosynthesis;Completeproteome;Dioxygenase;Iron;Metal-binding;Methioninebiosynthesis;Nickel;Oxidoreductase;Referenceproteome	Acireductone dioxygenase	6	66.1	20.224	0	67.242	25.102	25.8599	24.8701	25.3463	26.1812	26.0765	24.488	23.9355	22.0624	22.9456	22.8491	23.6063
1.37489	-2.50177	A6T674	ybdL	biosynthetic process;metabolic process	binding;catalytic activity;cofactor binding;pyridoxal phosphate binding;transaminase activity;transferase activity;transferase activity, transferring nitrogenous groups;vitamin B6 binding;vitamin binding		Aminotransferase;Completeproteome;Referenceproteome;Transferase		6	43.8	42.826	0	130.4	27.2517	27.0387	26.8067	26.5914	26.5619	26.4328	22.7557	26.4303	22.8056	23.0088	23.8377	22.5216
1.84385	-2.01024	A6T679	ahpC	response to chemical stimulus;response to oxidative stress;response to stimulus;response to stress	catalytic activity;oxidoreductase activity;oxidoreductase activity, acting on paired donors, with incorporation or reduction of molecular oxygen;peroxiredoxin activity		Completeproteome;Referenceproteome		11	83.4	20.763	0	134.15	27.8587	27.9673	27.7249	28.0618	27.6867	26.982	27.9084	28.024	26.4839	26.4845	25.3732	24.2185
4.664	-3.7299	A6T6F2	sdhA	acetyl-CoA catabolic process;acetyl-CoA metabolic process;catabolic process;cellular catabolic process;cellular metabolic process;cellular process;coenzyme catabolic process;coenzyme metabolic process;cofactor catabolic process;cofactor metabolic process;electron transport chain;generation of precursor metabolites and energy;metabolic process;oxidation-reduction process;tricarboxylic acid cycle	binding;catalytic activity;coenzyme binding;cofactor binding;flavin adenine dinucleotide binding;oxidoreductase activity;oxidoreductase activity, acting on the CH-CH group of donors		Completeproteome;Referenceproteome		5	15.5	64.477	0	256.9	26.7379	25.4955	26.3264	28.8688	26.9738	26.0168	26.5092	26.5231	22.1244	23.2714	22.7033	23.0042
2.44569	-3.15263	A6T6F7	sucD		acid-thiol ligase activity;adenyl nucleotide binding;adenyl ribonucleotide binding;ATP binding;ATP citrate synthase activity;binding;catalytic activity;CoA-ligase activity;cofactor binding;ligase activity;ligase activity, forming carbon-sulfur bonds;nucleotide binding;purine nucleotide binding;purine ribonucleoside triphosphate binding;purine ribonucleotide binding;ribonucleotide binding;succinat…		ATP-binding;Completeproteome;Ligase;Nucleotide-binding;Referenceproteome	Succinyl-CoA ligase [ADP-forming] subunit alpha	7	49.1	29.808	0	172.17	25.9172	26.1694	25.8331	26.272	26.1269	26.2846	27.318	27.22	25.3925	23.1823	22.848	22.9162
1.81985	-2.42378	A6T6Q6	dps	biological regulation;cation homeostasis;cellular cation homeostasis;cellular chemical homeostasis;cellular component organization;cellular component organization at cellular level;cellular component organization or biogenesis;cellular component organization or biogenesis at cellular level;cellular homeostasis;cellular ion homeostasis;cellular iron ion homeostasis;cellular macromolecule metabolic…	binding;catalytic activity;cation binding;DNA binding;ferric iron binding;ion binding;iron ion binding;metal ion binding;nucleic acid binding;oxidoreductase activity;oxidoreductase activity, oxidizing metal ions;transition metal ion binding	cell part;cytoplasm;intracellular part	Completeproteome;Cytoplasm;DNA-binding;DNAcondensation;Iron;Ironstorage;Metal-binding;Oxidoreductase;Referenceproteome	DNA protection during starvation protein	7	62.9	18.708	0	47.196	25.8835	25.8874	25.7616	25.9962	25.8281	25.5845	25.767	25.5303	25.3272	23.0892	22.2064	22.392
1.78194	-2.73652	A6T8N7	pntB		binding;catalytic activity;coenzyme binding;cofactor binding;NAD(P)+ transhydrogenase (AB-specific) activity;NAD(P)+ transhydrogenase activity;NADP binding;nucleotide binding;oxidoreductase activity;oxidoreductase activity, acting on NADH or NADPH;oxidoreductase activity, acting on NADH or NADPH, NAD or NADP as acceptor	cell part;integral to membrane;intrinsic to membrane;membrane;membrane part;plasma membrane	Cellinnermembrane;Cellmembrane;Completeproteome;Membrane;NAD;NADP;Oxidoreductase;Referenceproteome	NAD(P) transhydrogenase subunit beta	5	16.9	48.799	0	41.831	26.8761	26.7853	26.7641	26.8765	26.2104	22.894	26.3295	26.0859	22.5575	22.6696	22.6648	22.6818
1.89383	-1.69076	A6T8X5	KPN_01615	amine biosynthetic process;amine metabolic process;aspartate family amino acid biosynthetic process;aspartate family amino acid metabolic process;biosynthetic process;carboxylic acid biosynthetic process;carboxylic acid metabolic process;cellular amine metabolic process;cellular amino acid biosynthetic process;cellular amino acid metabolic process;cellular biosynthetic process;cellular ketone met…	5-methyltetrahydropteroyltriglutamate-homocysteine S-methyltransferase activity;5-methyltetrahydropteroyltri-L-glutamate-dependent methyltransferase activity;binding;catalytic activity;cation binding;ion binding;metal ion binding;methyltransferase activity;S-methyltransferase activity;transferase activity;transferase activity, transferring one-carbon groups;transition metal ion binding;zinc ion b…		Completeproteome;Referenceproteome		7	30.5	41.333	0	44.492	23.454	23.6744	24.0358	23.6013	24.1053	23.3482	24.7782	24.8912	23.0652	22.7986	21.6272	22.8687
2.93783	1.80572	A6T962	deoC	carbohydrate catabolic process;carbohydrate metabolic process;catabolic process;cellular catabolic process;cellular metabolic process;cellular nitrogen compound catabolic process;cellular nitrogen compound metabolic process;cellular process;deoxyribonucleotide catabolic process;deoxyribonucleotide metabolic process;deoxyribose phosphate catabolic process;deoxyribose phosphate metabolic process;me…	aldehyde-lyase activity;carbon-carbon lyase activity;catalytic activity;deoxyribose-phosphate aldolase activity;lyase activity	cell part;cytoplasm;intracellular part	Completeproteome;Cytoplasm;Lyase;Referenceproteome;Schiffbase	Deoxyribose-phosphate aldolase	9	52.2	27.313	0	153.29	26.015	25.6832	26.103	26.064	26.0189	25.5258	25.624	25.6037	28.2308	26.8529	27.2818	27.6298
1.85255	-1.79046	A6T9J1	KPN_01831	response to chemical stimulus;response to oxidative stress;response to stimulus;response to stress	antioxidant activity;catalytic activity;oxidoreductase activity;oxidoreductase activity, acting on peroxide as acceptor;peroxidase activity		Completeproteome;Referenceproteome		4	74.8	15.093	0	66.685	24.7858	24.6038	24.8841	24.7547	25.2376	24.9611	23.3763	24.7092	21.964	22.9805	22.678	23.4999
1.78532	-1.84724	A6TAH5	KPN_02168				Completeproteome;Lipoprotein;Referenceproteome	Lipoprotein	6	36.1	29.1	0	48.531	24.6197	24.4725	23.931	24.4088	24.3082	23.88	25.538	25.8914	22.7637	23.5979	23.4669	22.4001
3.0177	-2.72974	A6TB35	aspS	amine metabolic process;amino acid activation;carboxylic acid metabolic process;cellular amine metabolic process;cellular amino acid metabolic process;cellular ketone metabolic process;cellular macromolecule metabolic process;cellular metabolic process;cellular nitrogen compound metabolic process;cellular process;macromolecule metabolic process;metabolic process;ncRNA metabolic process;nitrogen c…	adenyl nucleotide binding;adenyl ribonucleotide binding;aminoacyl-tRNA ligase activity;aspartate-tRNA ligase activity;ATP binding;binding;catalytic activity;ligase activity;ligase activity, forming aminoacyl-tRNA and related compounds;ligase activity, forming carbon-oxygen bonds;nucleic acid binding;nucleotide binding;purine nucleotide binding;purine ribonucleoside triphosphate binding;purine rib…	cell part;cytoplasm;intracellular part	Aminoacyl-tRNAsynthetase;ATP-binding;Completeproteome;Cytoplasm;Ligase;Nucleotide-binding;Proteinbiosynthesis;Referenceproteome	Aspartate--tRNA ligase	6	18	66.414	0	164.78	25.4152	25.4281	25.3083	25.3709	25.4559	24.7799	25.7163	25.6557	21.7584	23.7118	22.6453	22.5732
1.94145	-2.28961	A6TBJ8	thiM	aromatic compound biosynthetic process;biosynthetic process;cellular aromatic compound metabolic process;cellular biosynthetic process;cellular metabolic process;cellular nitrogen compound biosynthetic process;cellular nitrogen compound metabolic process;cellular process;coenzyme biosynthetic process;coenzyme metabolic process;cofactor biosynthetic process;cofactor metabolic process;heterocycle b…	adenyl nucleotide binding;adenyl ribonucleotide binding;ATP binding;binding;catalytic activity;cation binding;hydroxyethylthiazole kinase activity;ion binding;kinase activity;magnesium ion binding;metal ion binding;nucleotide binding;phosphotransferase activity, alcohol group as acceptor;purine nucleotide binding;purine ribonucleoside triphosphate binding;purine ribonucleotide binding;ribonucleot…		ATP-binding;Completeproteome;Kinase;Magnesium;Metal-binding;Nucleotide-binding;Referenceproteome;Thiaminebiosynthesis;Transferase	Hydroxyethylthiazole kinase	7	53.7	26.117	0	252.12	27.917	27.8809	27.0641	27.5042	27.019	26.256	25.5321	26.3276	25.1328	22.7561	23.363	24.7244
1.59315	-1.70637	A6TCB3	purM	biosynthetic process;cellular biosynthetic process;cellular metabolic process;cellular nitrogen compound biosynthetic process;cellular nitrogen compound metabolic process;cellular process;'de novo' IMP biosynthetic process;heterocycle biosynthetic process;heterocycle metabolic process;IMP biosynthetic process;IMP metabolic process;metabolic process;nitrogen compound metabolic process;nucleobase-c…	adenyl nucleotide binding;adenyl ribonucleotide binding;ATP binding;binding;catalytic activity;cyclo-ligase activity;ligase activity;ligase activity, forming carbon-nitrogen bonds;nucleotide binding;phosphoribosylformylglycinamidine cyclo-ligase activity;purine nucleotide binding;purine ribonucleoside triphosphate binding;purine ribonucleotide binding;ribonucleotide binding	cell part;cytoplasm;intracellular part	ATP-binding;Completeproteome;Cytoplasm;Ligase;Nucleotide-binding;Purinebiosynthesis;Referenceproteome	Phosphoribosylformylglycinamidine cyclo-ligase	4	32.5	36.722	0	84.174	26.3959	26.5325	26.7226	27.0185	27.1004	26.1705	25.2793	26.8801	25.0696	25.2005	24.8883	23.4463
2.00247	-2.40809	A6TCF1	iscS	amine metabolic process;carboxylic acid metabolic process;cellular amine metabolic process;cellular amino acid metabolic process;cellular ketone metabolic process;cellular metabolic process;cellular nitrogen compound metabolic process;cellular process;cysteine metabolic process;metabolic process;nitrogen compound metabolic process;organic acid metabolic process;oxoacid metabolic process;primary m…	2 iron, 2 sulfur cluster binding;binding;catalytic activity;cation binding;cofactor binding;cysteine desulfurase activity;ion binding;iron-sulfur cluster binding;metal cluster binding;metal ion binding;pyridoxal phosphate binding;sulfurtransferase activity;transferase activity;transferase activity, transferring sulfur-containing groups;vitamin B6 binding;vitamin binding	cell part;cytoplasm;intracellular part	2Fe-2S;Completeproteome;Cytoplasm;Iron;Iron-sulfur;Metal-binding;Pyridoxalphosphate;Referenceproteome;Transferase	Cysteine desulfurase IscS	12	48	45.056	0	189.57	25.6625	25.7313	25.4632	25.8689	25.694	25.3797	25.508	26.2166	24.6973	23.9799	22.251	22.2377
2.91389	-1.88638	A6TCK8	aroF	amine biosynthetic process;amine metabolic process;aromatic amino acid family biosynthetic process;aromatic amino acid family metabolic process;aromatic compound biosynthetic process;biosynthetic process;carboxylic acid biosynthetic process;carboxylic acid metabolic process;cellular amine metabolic process;cellular amino acid biosynthetic process;cellular amino acid metabolic process;cellular aro…	3-deoxy-7-phosphoheptulonate synthase activity;catalytic activity;transferase activity;transferase activity, transferring alkyl or aryl (other than methyl) groups		Amino-acidbiosynthesis;Aromaticaminoacidbiosynthesis;Completeproteome;Referenceproteome;Transferase	Phospho-2-dehydro-3-deoxyheptonate aldolase	6	33.1	38.817	0	79.304	25.8882	25.5305	24.7559	25.681	25.2478	24.9467	26.1161	25.6092	23.9449	23.5924	23.8388	22.9982
3.93324	-2.35282	A6TD43	cysN	biosynthetic process;cellular biosynthetic process;cellular metabolic process;cellular process;hydrogen sulfide biosynthetic process;hydrogen sulfide metabolic process;metabolic process;sulfate assimilation;sulfur compound biosynthetic process;sulfur compound metabolic process	adenyl nucleotide binding;adenyl ribonucleotide binding;adenylyltransferase activity;ATP binding;binding;catalytic activity;GTP binding;GTPase activity;guanyl nucleotide binding;guanyl ribonucleotide binding;hydrolase activity;hydrolase activity, acting on acid anhydrides;hydrolase activity, acting on acid anhydrides, in phosphorus-containing anhydrides;nucleoside-triphosphatase activity;nucleoti…		ATP-binding;Completeproteome;GTP-binding;Nucleotide-binding;Nucleotidyltransferase;Referenceproteome;Transferase	Sulfate adenylyltransferase subunit 1	15	49.9	52.491	0	139.45	27.0824	26.1171	25.5756	25.8033	25.7107	25.0034	24.8248	25.3108	22.5723	22.875	22.6222	23.3689
2.93457	-1.88339	A6TD49	cysJ	amine biosynthetic process;amine metabolic process;biosynthetic process;carboxylic acid biosynthetic process;carboxylic acid metabolic process;cellular amine metabolic process;cellular amino acid biosynthetic process;cellular amino acid metabolic process;cellular biosynthetic process;cellular ketone metabolic process;cellular metabolic process;cellular nitrogen compound biosynthetic process;cellu…	binding;catalytic activity;cation binding;coenzyme binding;cofactor binding;flavin adenine dinucleotide binding;FMN binding;ion binding;iron ion binding;metal ion binding;nucleotide binding;oxidoreductase activity;oxidoreductase activity, acting on a sulfur group of donors;oxidoreductase activity, acting on a sulfur group of donors, NAD or NADP as acceptor;oxidoreductase activity, acting on NADH …		Amino-acidbiosynthesis;Completeproteome;Cysteinebiosynthesis;Electrontransport;FAD;Flavoprotein;FMN;NADP;Oxidoreductase;Referenceproteome;Transport	Sulfite reductase [NADPH] flavoprotein alpha-component	11	36.1	66.019	0	84.191	25.4976	25.3763	25.3333	25.2297	25.1753	24.6644	25.4367	25.7192	23.4741	23.8777	23.3711	22.7392
2.77018	-1.85547	A6TDP4;A6T5T1	lysS	amine metabolic process;amino acid activation;carboxylic acid metabolic process;cellular amine metabolic process;cellular amino acid metabolic process;cellular ketone metabolic process;cellular macromolecule metabolic process;cellular metabolic process;cellular nitrogen compound metabolic process;cellular process;lysyl-tRNA aminoacylation;macromolecule metabolic process;metabolic process;ncRNA me…	adenyl nucleotide binding;adenyl ribonucleotide binding;aminoacyl-tRNA ligase activity;ATP binding;binding;catalytic activity;cation binding;ion binding;ligase activity;ligase activity, forming aminoacyl-tRNA and related compounds;ligase activity, forming carbon-oxygen bonds;lysine-tRNA ligase activity;magnesium ion binding;metal ion binding;nucleic acid binding;nucleotide binding;purine nucleoti…	cell part;cytoplasm;intracellular part	Aminoacyl-tRNAsynthetase;ATP-binding;Completeproteome;Cytoplasm;Ligase;Magnesium;Metal-binding;Nucleotide-binding;Proteinbiosynthesis;Referenceproteome	Lysine--tRNA ligase	6	20.6	57.55	0	52.364	24.4085	24.0766	24.3756	24.5992	24.2757	23.9934	24.4841	25.3395	23.085	22.8566	22.4755	22.2537
2.58949	-1.81083	A6TDT3;A6T7I9	tktA		binding;catalytic activity;cation binding;ion binding;metal ion binding;transferase activity;transferase activity, transferring aldehyde or ketonic groups;transketolase activity		Calcium;Completeproteome;Magnesium;Metal-binding;Referenceproteome;Thiaminepyrophosphate;Transferase	Transketolase	12	30.9	71.95	0	188.39	27.3877	27.6339	26.8022	27.0212	26.6411	25.8641	25.5287	26.6054	23.6497	24.7109	24.5945	24.4409
2.33054	-1.85534	A6TDV1	metK	amine biosynthetic process;amine metabolic process;biosynthetic process;carboxylic acid biosynthetic process;carboxylic acid metabolic process;cellular amine metabolic process;cellular amino acid biosynthetic process;cellular amino acid metabolic process;cellular biosynthetic process;cellular ketone metabolic process;cellular metabolic process;cellular modified amino acid biosynthetic process;cel…	adenyl nucleotide binding;adenyl ribonucleotide binding;ATP binding;binding;catalytic activity;cation binding;ion binding;magnesium ion binding;metal ion binding;methionine adenosyltransferase activity;nucleotide binding;purine nucleotide binding;purine ribonucleoside triphosphate binding;purine ribonucleotide binding;ribonucleotide binding;transferase activity;transferase activity, transferring …	cell part;cytoplasm;intracellular part	ATP-binding;Cobalt;Completeproteome;Cytoplasm;Magnesium;Metal-binding;Nucleotide-binding;One-carbonmetabolism;Potassium;Referenceproteome;Transferase	S-adenosylmethionine synthase	14	62.5	41.907	0	281.68	28.7838	28.7015	28.246	28.463	28.0269	27.6236	28.2714	27.7146	26.8919	25.05	26.4244	25.8488
1.68674	-2.2156	A6TEJ0	argG	amine biosynthetic process;amine metabolic process;arginine biosynthetic process;arginine metabolic process;biosynthetic process;carboxylic acid biosynthetic process;carboxylic acid metabolic process;cellular amine metabolic process;cellular amino acid biosynthetic process;cellular amino acid metabolic process;cellular biosynthetic process;cellular ketone metabolic process;cellular metabolic proc…	adenyl nucleotide binding;adenyl ribonucleotide binding;argininosuccinate synthase activity;ATP binding;binding;catalytic activity;ligase activity;ligase activity, forming carbon-nitrogen bonds;nucleotide binding;purine nucleotide binding;purine ribonucleoside triphosphate binding;purine ribonucleotide binding;ribonucleotide binding	cell part;cytoplasm;intracellular part	Amino-acidbiosynthesis;Argininebiosynthesis;ATP-binding;Completeproteome;Cytoplasm;Ligase;Nucleotide-binding;Referenceproteome	Argininosuccinate synthase	7	30	49.812	0	229.05	25.6047	25.3127	25.5098	26.0123	25.6976	25.5802	25.3178	25.6061	25.3438	22.3647	22.3397	23.2911
2.02364	-1.90983	A6TFK4	secB	cellular component assembly;cellular component organization;cellular component organization or biogenesis;cellular macromolecule metabolic process;cellular metabolic process;cellular process;cellular protein metabolic process;establishment of localization;establishment of protein localization;macromolecular complex assembly;macromolecular complex subunit organization;macromolecule metabolic proce…		cell part;cytoplasm;intracellular part	Chaperone;Completeproteome;Cytoplasm;Proteintransport;Referenceproteome;Translocation;Transport	Protein-export protein SecB	3	45.2	17.19	0	135.06	26.3362	25.5979	25.2476	25.3756	25.0808	25.2971	23.2573	25.2272	23.2218	22.5712	22.6815	22.7487
2.72076	-1.63587	A6TFR0	zapB	asexual reproduction;barrier septum formation;cellular component assembly;cellular component assembly at cellular level;cellular component organization;cellular component organization at cellular level;cellular component organization or biogenesis;cellular component organization or biogenesis at cellular level;cellular process;cytokinesis;cytokinesis by binary fission;cytokinetic process;establis…		cell part;cytoplasm;intracellular part;membrane	Cellcycle;Celldivision;Coiledcoil;Completeproteome;Cytoplasm;Referenceproteome;Septation	Cell division protein ZapB	2	44.4	9.5567	0	21.448	24.7649	24.4677	24.775	24.7151	24.2921	24.2187	24.898	24.9752	23.309	22.7211	23.4083	22.4021
1.41991	-1.8452	A6TG36	atpD	ATP biosynthetic process;ATP hydrolysis coupled proton transport;ATP metabolic process;ATP synthesis coupled proton transport;biosynthetic process;cation transport;cellular biosynthetic process;cellular metabolic process;cellular nitrogen compound biosynthetic process;cellular nitrogen compound metabolic process;cellular process;energy coupled proton transport, against electrochemical gradient;en…	adenyl nucleotide binding;adenyl ribonucleotide binding;ATP binding;binding;cation transmembrane transporter activity;hydrogen ion transmembrane transporter activity;hydrogen ion transporting ATP synthase activity, rotational mechanism;inorganic cation transmembrane transporter activity;ion transmembrane transporter activity;monovalent inorganic cation transmembrane transporter activity;nucleotid…	cell part;intracellular part;macromolecular complex;membrane;membrane part;plasma membrane;protein complex;proton-transporting ATP synthase complex, catalytic core F(1);proton-transporting two-sector ATPase complex, catalytic domain	ATP-binding;ATPsynthesis;Cellinnermembrane;Cellmembrane;CF(1);Completeproteome;Hydrogeniontransport;Hydrolase;Iontransport;Membrane;Nucleotide-binding;Referenceproteome;Transport	ATP synthase subunit beta	21	65.4	50.21	0	323.31	27.7849	27.8646	27.6931	27.6188	27.3517	27.1396	25.5776	27.2063	24.7283	25.1913	23.6397	26.3351
1.48537	-2.57916	A6TG38	atpA	ATP biosynthetic process;ATP hydrolysis coupled proton transport;ATP metabolic process;ATP synthesis coupled proton transport;biosynthetic process;cation transport;cellular biosynthetic process;cellular metabolic process;cellular nitrogen compound biosynthetic process;cellular nitrogen compound metabolic process;cellular process;energy coupled proton transport, against electrochemical gradient;en…	active transmembrane transporter activity;adenyl nucleotide binding;adenyl ribonucleotide binding;ATP binding;ATPase activity;ATPase activity, coupled;ATPase activity, coupled to movement of substances;ATPase activity, coupled to transmembrane movement of ions;ATPase activity, coupled to transmembrane movement of substances;binding;catalytic activity;cation transmembrane transporter activity;cati…	cell part;intracellular part;macromolecular complex;membrane;membrane part;plasma membrane;protein complex;proton-transporting ATP synthase complex, catalytic core F(1);proton-transporting two-sector ATPase complex, catalytic domain	ATP-binding;ATPsynthesis;Cellinnermembrane;Cellmembrane;CF(1);Completeproteome;Hydrogeniontransport;Hydrolase;Iontransport;Membrane;Nucleotide-binding;Referenceproteome;Transport	ATP synthase subunit alpha	18	47	55.168	0	323.31	29.1364	28.5603	28.7094	28.2799	27.9209	27.1224	27.5543	26.5731	26.5241	23.7477	22.7299	25.8524
1.96065	-2.07171	A6TGB8	pfkA	alcohol catabolic process;alcohol metabolic process;carbohydrate catabolic process;carbohydrate metabolic process;catabolic process;cellular carbohydrate catabolic process;cellular carbohydrate metabolic process;cellular metabolic process;cellular process;fructose 6-phosphate metabolic process;fructose metabolic process;generation of precursor metabolites and energy;glucose catabolic process;gluc…	6-phosphofructokinase activity;adenyl nucleotide binding;adenyl ribonucleotide binding;ATP binding;binding;carbohydrate kinase activity;catalytic activity;cation binding;ion binding;kinase activity;metal ion binding;nucleotide binding;phosphofructokinase activity;phosphotransferase activity, alcohol group as acceptor;purine nucleotide binding;purine ribonucleoside triphosphate binding;purine ribo…	cell part;cytoplasm;intracellular part	Allostericenzyme;ATP-binding;Completeproteome;Cytoplasm;Glycolysis;Kinase;Magnesium;Metal-binding;Nucleotide-binding;Referenceproteome;Transferase	ATP-dependent 6-phosphofructokinase	6	34.7	34.984	0	97.579	24.9294	24.647	25.2882	25.9366	25.3382	26.0758	26.4153	25.7341	23.4314	24.5698	24.7527	22.5225
1.53361	-1.692	A6TGD4	metF	amine biosynthetic process;amine metabolic process;aspartate family amino acid biosynthetic process;aspartate family amino acid metabolic process;biosynthetic process;carboxylic acid biosynthetic process;carboxylic acid metabolic process;cellular amine metabolic process;cellular amino acid biosynthetic process;cellular amino acid metabolic process;cellular aromatic compound metabolic process;cell…	catalytic activity;methylenetetrahydrofolate reductase (NADPH) activity;oxidoreductase activity;oxidoreductase activity, acting on the CH-NH group of donors;oxidoreductase activity, acting on the CH-NH group of donors, NAD or NADP as acceptor	cell part;cytoplasmic part;cytosol;intracellular part	Amino-acidbiosynthesis;Completeproteome;FAD;Flavoprotein;Oxidoreductase;Referenceproteome	Methylenetetrahydrofolate reductase	7	31.2	33.116	0	52.581	25.3601	25.0956	24.7649	25.0625	24.8133	25.2295	26.3893	26.3639	24.7493	24.0128	22.7722	24.4937
1.9398	-2.40477	A6TGF3	yifE				Completeproteome;Referenceproteome		2	17	13.153	0	142.49	25.0539	25.5298	26.4971	26.0974	26.1897	25.333	26.2772	26.5473	25.437	23.6148	22.9879	22.6885
2.14153	-2.06742	A6TGF7	ilvE	amine metabolic process;branched chain family amino acid metabolic process;carboxylic acid metabolic process;cellular amine metabolic process;cellular amino acid metabolic process;cellular ketone metabolic process;cellular metabolic process;cellular nitrogen compound metabolic process;cellular process;metabolic process;nitrogen compound metabolic process;organic acid metabolic process;oxoacid met…	branched-chain-amino-acid transaminase activity;catalytic activity;transaminase activity;transferase activity;transferase activity, transferring nitrogenous groups		Aminotransferase;Completeproteome;Pyridoxalphosphate;Referenceproteome;Transferase		6	35.6	33.912	0	73.457	24.6545	24.9508	24.7871	25.2892	25.489	24.9014	25.2197	25.4624	24.5592	22.3241	23.3284	22.5911
1.79229	-1.79248	A6TGP7	thiG	aromatic compound biosynthetic process;biosynthetic process;cellular aromatic compound metabolic process;cellular biosynthetic process;cellular metabolic process;cellular nitrogen compound biosynthetic process;cellular nitrogen compound metabolic process;cellular process;coenzyme biosynthetic process;coenzyme metabolic process;cofactor biosynthetic process;cofactor metabolic process;heterocycle b…	catalytic activity;sulfurtransferase activity;transferase activity;transferase activity, transferring sulfur-containing groups	cell part;cytoplasm;intracellular part	Completeproteome;Cytoplasm;Referenceproteome;Schiffbase;Thiaminebiosynthesis;Transferase	Thiazole synthase	7	42.2	26.786	0	74.707	26.0823	25.8641	25.5557	25.6623	25.5497	25.0347	24.7045	25.2301	24.7368	23.4415	22.7175	22.4533
2.03551	-1.50691	A6TGS0	metH	cellular aromatic compound metabolic process;cellular metabolic process;cellular process;heterocycle metabolic process;metabolic process;nitrogen compound metabolic process;pteridine-containing compound metabolic process	5-methyltetrahydrofolate-dependent methyltransferase activity;binding;catalytic activity;cation binding;cobalamin binding;homocysteine S-methyltransferase activity;ion binding;metal ion binding;methionine synthase activity;methyltransferase activity;S-adenosylmethionine-dependent methyltransferase activity;S-methyltransferase activity;tetrapyrrole binding;transferase activity;transferase activity…	cell part;intracellular	Cobalt;Completeproteome;Metal-binding;Referenceproteome;Zinc		8	10.4	135.75	0	62.312	24.2696	24.6946	24.0582	24.6033	24.5467	23.9111	23.5107	24.2217	21.5971	22.8138	23.135	22.6168
2.52819	-2.41338	A6TGT4	pgi	alcohol biosynthetic process;alcohol catabolic process;alcohol metabolic process;biosynthetic process;carbohydrate biosynthetic process;carbohydrate catabolic process;carbohydrate metabolic process;catabolic process;cellular biosynthetic process;cellular carbohydrate biosynthetic process;cellular carbohydrate catabolic process;cellular carbohydrate metabolic process;cellular metabolic process;cel…	catalytic activity;glucose-6-phosphate isomerase activity;intramolecular oxidoreductase activity;intramolecular oxidoreductase activity, interconverting aldoses and ketoses;isomerase activity	cell part;cytoplasm;intracellular part	Completeproteome;Cytoplasm;Gluconeogenesis;Glycolysis;Isomerase;Referenceproteome	Glucose-6-phosphate isomerase	14	40.3	61.328	0	323.31	27.3359	27.3535	26.363	27.3064	26.3971	25.909	25.7987	25.8065	23.6394	24.745	22.3941	23.4793
1.88716	-1.74524	A6TI05	yjjK		adenyl nucleotide binding;adenyl ribonucleotide binding;ATP binding;ATPase activity;binding;catalytic activity;hydrolase activity;hydrolase activity, acting on acid anhydrides;hydrolase activity, acting on acid anhydrides, in phosphorus-containing anhydrides;nucleoside-triphosphatase activity;nucleotide binding;purine nucleotide binding;purine ribonucleoside triphosphate binding;purine ribonucleo…		ATP-binding;Completeproteome;Nucleotide-binding;Referenceproteome		7	21.9	61.395	0	51.532	25.466	24.972	24.6331	24.8997	25.3142	23.5598	25.6935	25.5212	23.2358	23.3297	23.0827	23.4595
