# Supplementary material for: Iron Limitation in Klebsiella pneumoniae Defines New Roles for Lon Protease in Homeostasis and Degradation by Quantitative Proteomics
Source: Front Microbiol. 2020 Apr 24;11:546. doi: 10.3389/fmicb.2020.00546 (PMC7194016; doi:10.3389/fmicb.2020.00546)
Supplement: TABLE S4 — Significantly different proteins in secretome under replete (10 μM) vs. limited conditions. [file Table_4.XLSX]

## Sheet: Sheet1
(-)log10 p-value	Difference	Protein IDs	Gene name	GOBP name	GOMF name	GOCC name	Keywords	Protein name	Peptides	Sequence coverage [%]	Mol. weight [kDa]	Q-value	Score	LFQ intensity 401#1	LFQ intensity 401#2	LFQ intensity 401#3	LFQ intensity 401#4	LFQ intensity WT#1	LFQ intensity WT#2	LFQ intensity WT#3	LFQ intensity WT#4
4.04456	-1.50017	A6T526	nqrF	cation transport;establishment of localization;ion transport;metal ion transport;monovalent inorganic cation transport;sodium ion transport;transport	2 iron, 2 sulfur cluster binding;binding;catalytic activity;cation binding;electron carrier activity;ion binding;iron-sulfur cluster binding;metal cluster binding;metal ion binding;oxidoreductase activity;oxidoreductase activity, acting on NADH or NADPH;oxidoreductase activity, acting on NADH or NADPH, quinone or similar compound as acceptor	cell part;integral to membrane;intrinsic to membrane;membrane;membrane part;plasma membrane	2Fe-2S;Cellinnermembrane;Cellmembrane;Completeproteome;FAD;Flavoprotein;Iontransport;Iron;Iron-sulfur;Membrane;Metal-binding;NAD;Oxidoreductase;Referenceproteome;Sodium;Sodiumtransport;Transmembrane;Transmembranehelix;Transport;Ubiquinone	Na(+)-translocating NADH-quinone reductase subunit F	6	17.2	45.281	0	12.018	26.0689	25.5772	26.2558	25.8748	27.2915	27.6415	27.4092	27.4352
1.46882	-2.48338	A6T538	gabD	amine catabolic process;amine metabolic process;carboxylic acid catabolic process;carboxylic acid metabolic process;catabolic process;cellular amine metabolic process;cellular amino acid catabolic process;cellular amino acid metabolic process;cellular catabolic process;cellular ketone metabolic process;cellular metabolic process;cellular nitrogen compound metabolic process;cellular process;gamma-…	catalytic activity;oxidoreductase activity;oxidoreductase activity, acting on the aldehyde or oxo group of donors;oxidoreductase activity, acting on the aldehyde or oxo group of donors, NAD or NADP as acceptor;succinate-semialdehyde dehydrogenase [NAD(P)+] activity		Completeproteome;Oxidoreductase;Referenceproteome		8	26.8	51.711	0	78.99	24.6897	27.0979	26.8627	28.685	28.39	28.9796	29.831	30.0682
4.38266	-8.33802	A6T5I2	lon	cellular process;cellular response to stimulus;cellular response to stress;macromolecule metabolic process;metabolic process;misfolded or incompletely synthesized protein catabolic process;primary metabolic process;protein metabolic process;proteolysis;proteolysis involved in cellular protein catabolic process;response to stimulus;response to stress	adenyl nucleotide binding;adenyl ribonucleotide binding;ATP binding;ATPase activity;ATPase activity, coupled;ATP-dependent peptidase activity;binding;catalytic activity;DNA binding;endopeptidase activity;hydrolase activity;hydrolase activity, acting on acid anhydrides;hydrolase activity, acting on acid anhydrides, in phosphorus-containing anhydrides;nucleic acid binding;nucleoside-triphosphatase …	cell part;cytoplasm;intracellular part	ATP-binding;Completeproteome;Cytoplasm;DNA-binding;Hydrolase;Nucleotide-binding;Protease;Referenceproteome;Repeat;Serineprotease;Stressresponse	Lon protease	50	55.9	87.471	0	322.46	25.9717	24.7943	28.1519	24.8613	34.4373	34.2117	34.3364	34.146
1.2659	2.54602	A6T5N8	gsk		catalytic activity;kinase activity;phosphotransferase activity, alcohol group as acceptor;transferase activity;transferase activity, transferring phosphorus-containing groups		Completeproteome;Kinase;Referenceproteome;Transferase		4	15	48.135	0	2.0744	23.6857	27.633	27.6279	28.1227	23.5852	24.0011	24.6098	24.6891
1.36697	-1.92066	A6T6M7	moaC	aromatic compound biosynthetic process;biosynthetic process;cellular aromatic compound metabolic process;cellular biosynthetic process;cellular metabolic process;cellular nitrogen compound biosynthetic process;cellular nitrogen compound metabolic process;cellular process;coenzyme biosynthetic process;coenzyme metabolic process;cofactor biosynthetic process;cofactor metabolic process;heterocycle b…			Completeproteome;Molybdenumcofactorbiosynthesis;Referenceproteome	Cyclic pyranopterin monophosphate synthase accessory protein	3	34.6	17.466	0	17.678	23.7921	24.0694	26.5614	26.3996	27.3067	27.1735	27.2819	26.743
2.3968	-1.61612	A6T721	ompF		channel activity;passive transmembrane transporter activity;porin activity;transmembrane transporter activity;transporter activity;wide pore channel activity	cell part;membrane	Completeproteome;Referenceproteome		3	13.3	33.724	0	20.114	26.8453	25.19	26.2158	26.1264	27.4081	27.8682	27.717	27.8486
1.57779	-2.53498	A6T754	yccS				Completeproteome;Referenceproteome		3	9	80.32	0	9.5159	25.0503	26.8353	24.4173	28.0193	28.0228	28.6805	28.4561	29.3028
3.23842	2.36403	A6T7R2	KPN_01200		binding;catalytic activity;endonuclease activity;hydrolase activity;hydrolase activity, acting on ester bonds;nuclease activity;nucleic acid binding		Completeproteome;Referenceproteome		2	19.3	13.203	0.00057637	0.97692	28.1911	27.5671	27.4379	27.2265	24.5792	25.5107	25.9023	24.9743
2.26237	-1.54415	A6T8J2	paaY		catalytic activity;transferase activity		Completeproteome;Referenceproteome;Transferase		5	34.8	21.192	0	10.487	26.3036	27.3473	27.9407	27.3392	28.9413	28.6335	29.0475	28.4851
1.25854	-2.35548	A6T8K3	KPN_01492	amine metabolic process;carboxylic acid metabolic process;cellular amine metabolic process;cellular amino acid metabolic process;cellular ketone metabolic process;cellular metabolic process;cellular nitrogen compound metabolic process;cellular process;metabolic process;nitrogen compound metabolic process;organic acid metabolic process;oxoacid metabolic process;primary metabolic process;small mole…	catalytic activity;oxidoreductase activity;oxidoreductase activity, acting on the CH-NH2 group of donors;oxidoreductase activity, acting on the CH-NH2 group of donors, NAD or NADP as acceptor		Completeproteome;Oxidoreductase;Referenceproteome	Glutamate dehydrogenase	5	18.2	46.379	0	39.909	26.8775	23.5129	26.9365	27.7459	27.8292	28.8659	29.3285	28.4711
2.08342	-2.06518	A6T8N3	folM	cellular metabolic process;cellular process;metabolic process;one-carbon metabolic process;small molecule metabolic process	catalytic activity;dihydrofolate reductase activity;oxidoreductase activity;oxidoreductase activity, acting on the CH-NH group of donors;oxidoreductase activity, acting on the CH-NH group of donors, NAD or NADP as acceptor		Completeproteome;NADP;One-carbonmetabolism;Oxidoreductase;Referenceproteome	Dihydrofolate reductase FolM	10	51.7	26.418	0	23.855	26.2186	25.2228	27.4951	26.51	27.7967	28.8261	28.2202	28.8641
4.1083	-1.61254	A6T957	KPN_01697		binding;carbon-sulfur lyase activity;catalytic activity;cation binding;ion binding;lactoylglutathione lyase activity;lyase activity;metal ion binding		Completeproteome;Referenceproteome		4	48.8	14.405	0	48.879	28.9654	29.459	29.0802	28.8533	30.4488	30.6269	30.9525	30.78
3.10715	-2.63159	A6T960	KPN_01700	carbohydrate metabolic process;metabolic process;primary metabolic process	catalytic activity;isomerase activity;racemase and epimerase activity;racemase and epimerase activity, acting on carbohydrates and derivatives		Completeproteome;Referenceproteome		7	45	24.115	0	49.068	26.8999	27.7987	28.3384	26.6747	29.6309	30.0291	30.1696	30.4084
2.1042	-1.69835	A6T9J2	KPN_01832				Completeproteome;Referenceproteome		5	81.2	5.5057	0	15.939	24.18	25.4927	25.6144	26.172	27.1812	27.2365	26.7757	27.0591
2.89683	-3.13288	A6T9J3	KPN_01833				Completeproteome;Referenceproteome		6	45.9	14.814	0	18.325	25.3022	25.3627	25.1059	25.138	28.7914	29.0651	26.7292	28.8545
1.97324	-1.79474	A6T9K2	KPN_01842		catalytic activity;oxidoreductase activity		Completeproteome;Referenceproteome		6	33.2	32.417	0	5.0028	27.8727	28.8967	28.2529	28.1038	30.2438	28.7933	30.7297	30.5383
1.93411	-2.22694	A6T9S7	ydcY				Completeproteome;Referenceproteome		2	31.2	8.7507	0	2.585	24.9824	26.5753	27.5077	27.1504	28.6866	28.3251	29.575	28.5368
1.48345	2.5203	A6T9U4	ydcP		catalytic activity;hydrolase activity;peptidase activity		Completeproteome;Hydrolase;Protease;Referenceproteome		8	13.6	72.822	0	8.4584	28.1802	28.0196	28.5081	27.9912	22.9656	26.2628	26.505	26.8846
3.26667	-1.72876	A6TAJ2	yniA		catalytic activity;kinase activity;transferase activity;transferase activity, transferring phosphorus-containing groups		Completeproteome;Kinase;Referenceproteome;Transferase		5	27.4	34.293	0	66.383	26.7492	27.5622	27.3595	27.4339	28.6882	28.7192	29.4589	29.1535
4.52522	2.17114	A6TAL7	narJ	cellular component assembly;cellular component assembly at cellular level;cellular component organization;cellular component organization at cellular level;cellular component organization or biogenesis;cellular component organization or biogenesis at cellular level;cellular macromolecular complex assembly;cellular macromolecular complex subunit organization;cellular process;cellular protein compl…			Completeproteome;Referenceproteome		9	54.2	26.479	0	83.085	30.7509	30.9951	30.9711	30.9067	28.6675	29.2683	28.5879	28.4156
2.24253	2.05819	A6TAN6	ychA				Completeproteome;Referenceproteome		6	24.4	30.985	0	32.602	28.881	28.3463	29.4391	28.5796	27.3207	27.5894	25.7239	26.3793
3.82065	-1.65431	A6TB65	yecF				Completeproteome;Referenceproteome		5	78.4	8.2264	0	120.16	29.7004	29.0809	29.0867	29.5706	31.2027	30.9438	30.7303	31.1791
4.48095	2.42083	A6TB73	rcsA	biosynthetic process;cellular biosynthetic process;cellular macromolecule biosynthetic process;cellular macromolecule metabolic process;cellular metabolic process;cellular nitrogen compound metabolic process;cellular process;macromolecule biosynthetic process;macromolecule metabolic process;metabolic process;nitrogen compound metabolic process;nucleic acid metabolic process;nucleobase-containing …	binding;DNA binding;molecular transducer activity;nucleic acid binding;nucleic acid binding transcription factor activity;sequence-specific DNA binding transcription factor activity;signal transducer activity		Completeproteome;DNA-binding;Referenceproteome;Sensorytransduction;Transcription;Transcriptionregulation	Transcriptional regulatory protein RcsA	3	16.4	23.366	0	3.5056	27.8259	27.9502	27.5816	27.8673	24.9196	25.6717	25.1688	25.7816
1.88644	-1.92048	A6TBN5	mglB				Completeproteome;Referenceproteome		2	8.2	36.916	0.00057143	0.64155	25.1195	24.199	24.3475	25.907	25.7482	26.7661	27.4669	27.2736
1.77005	2.30449	A6TBX5	lrhA	biosynthetic process;cellular biosynthetic process;cellular macromolecule biosynthetic process;cellular macromolecule metabolic process;cellular metabolic process;cellular nitrogen compound metabolic process;cellular process;macromolecule biosynthetic process;macromolecule metabolic process;metabolic process;nitrogen compound metabolic process;nucleic acid metabolic process;nucleobase-containing …	binding;DNA binding;nucleic acid binding;nucleic acid binding transcription factor activity;sequence-specific DNA binding transcription factor activity		Completeproteome;DNA-binding;Referenceproteome;Transcription;Transcriptionregulation		9	39.3	33.466	0	34.24	29.5851	28.4734	29.1029	28.8366	27.3798	27.1028	24.7236	27.5738
2.37487	-2.19323	A6TBZ0	yfcH	cell division;cellular process	binding;catalytic activity;coenzyme binding;cofactor binding		Cellcycle;Celldivision;Completeproteome;Referenceproteome		2	8.4	32.934	0	3.7901	24.8795	24.541	25.005	26.1986	27.1833	26.9897	26.8965	28.3276
1.79527	2.43691	A6TC04	truA	cellular macromolecule metabolic process;cellular metabolic process;cellular nitrogen compound metabolic process;cellular process;macromolecule metabolic process;macromolecule modification;metabolic process;ncRNA metabolic process;ncRNA processing;nitrogen compound metabolic process;nucleic acid metabolic process;nucleobase-containing compound metabolic process;primary metabolic process;pseudouri…	binding;catalytic activity;intramolecular transferase activity;isomerase activity;nucleic acid binding;pseudouridine synthase activity;RNA binding		Completeproteome;Isomerase;Referenceproteome;tRNAprocessing	tRNA pseudouridine synthase A	4	18.1	30.292	0	2	28.6915	27.1726	28.2348	27.5873	26.0377	24.994	23.9441	26.9629
3.25497	-1.59435	A6TC35	KPN_02740		binding;carbon-carbon lyase activity;carboxy-lyase activity;catalytic activity;cation binding;coenzyme binding;cofactor binding;ion binding;lyase activity;magnesium ion binding;metal ion binding;thiamine pyrophosphate binding;vitamin binding		Completeproteome;Pyruvate;Referenceproteome		18	47.4	60.264	0	70.035	28.0178	28.6322	28.883	29.021	30.2058	30.0066	30.4407	30.2783
4.14762	-1.98449	A6TC39;A6T7A8	nupC		active transmembrane transporter activity;cation transmembrane transporter activity;inorganic cation transmembrane transporter activity;ion transmembrane transporter activity;metal ion transmembrane transporter activity;monovalent inorganic cation transmembrane transporter activity;nucleobase-containing compound transmembrane transporter activity;nucleoside transmembrane transporter activity;nucl…	cell part;integral to membrane;intrinsic to membrane;membrane;membrane part	Completeproteome;Membrane;Referenceproteome;Transmembrane;Transmembranehelix;Transport	Nucleoside permease	4	13.2	43.57	0	44.67	26.7842	27.0199	27.422	27.2127	28.6642	29.3941	29.1955	29.1229
3.01942	3.80638	A6TC41	yfeC				Completeproteome;Referenceproteome		6	71.4	12.715	0	28.297	28.628	29.0331	28.7035	28.5557	23.9505	23.7484	25.8494	26.1464
2.39667	2.14481	A6TC91	aegA	amine biosynthetic process;amine metabolic process;biosynthetic process;carboxylic acid biosynthetic process;carboxylic acid metabolic process;cellular amine metabolic process;cellular amino acid biosynthetic process;cellular amino acid metabolic process;cellular biosynthetic process;cellular ketone metabolic process;cellular metabolic process;cellular nitrogen compound biosynthetic process;cellu…	binding;catalytic activity;iron-sulfur cluster binding;metal cluster binding;oxidoreductase activity;oxidoreductase activity, acting on the CH-NH2 group of donors;oxidoreductase activity, acting on the CH-NH2 group of donors, NAD or NADP as acceptor		Completeproteome;Referenceproteome		3	6.8	68.925	0	2.1057	27.1712	26.9505	27.8043	27.1204	25.3285	26.2308	24.2129	24.695
1.25364	-2.1022	A6TCM2	nadK	biosynthetic process;cellular biosynthetic process;cellular metabolic process;cellular nitrogen compound biosynthetic process;cellular nitrogen compound metabolic process;cellular process;coenzyme biosynthetic process;coenzyme metabolic process;cofactor biosynthetic process;cofactor metabolic process;heterocycle biosynthetic process;heterocycle metabolic process;metabolic process;NAD metabolic pr…	adenyl nucleotide binding;adenyl ribonucleotide binding;ATP binding;binding;catalytic activity;cation binding;ion binding;kinase activity;metal ion binding;NAD+ kinase activity;nucleotide binding;phosphotransferase activity, alcohol group as acceptor;purine nucleotide binding;purine ribonucleoside triphosphate binding;purine ribonucleotide binding;ribonucleotide binding;transferase activity;trans…	cell part;cytoplasm;intracellular part	ATP-binding;Completeproteome;Cytoplasm;Kinase;NAD;NADP;Nucleotide-binding;Referenceproteome;Transferase	NAD kinase	3	11	32.408	0	2.9666	23.5672	25.1807	26.4255	22.8768	26.4004	27.0883	27.3477	25.6227
2.00481	-2.44776	A6TCY9	hycD		catalytic activity;oxidoreductase activity	cell part;integral to membrane;intrinsic to membrane;membrane;membrane part;plasma membrane	Completeproteome;Membrane;NAD;Oxidoreductase;Referenceproteome;Transmembrane		3	4.6	32.972	0	12.141	27.7247	26.4581	24.6412	26.7281	28.8984	28.5102	29.1923	28.7423
5.37136	1.69633	A6TD48	cysI	amine biosynthetic process;amine metabolic process;biosynthetic process;carboxylic acid biosynthetic process;carboxylic acid metabolic process;cellular amine metabolic process;cellular amino acid biosynthetic process;cellular amino acid metabolic process;cellular biosynthetic process;cellular ketone metabolic process;cellular metabolic process;cellular nitrogen compound biosynthetic process;cellu…	4 iron, 4 sulfur cluster binding;binding;catalytic activity;cation binding;coenzyme binding;cofactor binding;heme binding;ion binding;iron ion binding;iron-sulfur cluster binding;metal cluster binding;metal ion binding;NADP binding;nucleotide binding;oxidoreductase activity;oxidoreductase activity, acting on a sulfur group of donors;oxidoreductase activity, acting on a sulfur group of donors, NAD…	cell part;intracellular part;macromolecular complex;protein complex;sulfite reductase complex (NADPH)	4Fe-4S;Amino-acidbiosynthesis;Completeproteome;Cysteinebiosynthesis;Heme;Iron;Iron-sulfur;Metal-binding;NADP;Oxidoreductase;Referenceproteome	Sulfite reductase [NADPH] hemoprotein beta-component	36	63	64.048	0	323.31	33.5818	33.723	33.604	33.6956	32.1846	31.7777	32.0708	31.786
1.92605	-1.61728	A6TD51	ygcF	7-methylguanosine biosynthetic process;7-methylguanosine metabolic process;biosynthetic process;cellular biosynthetic process;cellular macromolecule metabolic process;cellular metabolic process;cellular nitrogen compound biosynthetic process;cellular nitrogen compound metabolic process;cellular process;guanosine biosynthetic process;guanosine metabolic process;heterocycle biosynthetic process;het…	4 iron, 4 sulfur cluster binding;binding;carbon-nitrogen lyase activity;catalytic activity;cation binding;ion binding;iron-sulfur cluster binding;lyase activity;metal cluster binding;metal ion binding		4Fe-4S;Completeproteome;Iron;Iron-sulfur;Lyase;Metal-binding;Queuosinebiosynthesis;Referenceproteome;S-adenosyl-L-methionine	7-carboxy-7-deazaguanine synthase	8	42.2	25.229	0	28.447	27.2084	28.1362	27.6043	28.29	29.5575	29.717	28.3395	30.0941
7.35597	7.01829	A6TDV9	KPN_03383	biosynthetic process;cellular biosynthetic process;cellular macromolecule biosynthetic process;cellular macromolecule metabolic process;cellular metabolic process;cellular nitrogen compound metabolic process;cellular process;macromolecule biosynthetic process;macromolecule metabolic process;metabolic process;nitrogen compound metabolic process;nucleic acid metabolic process;nucleobase-containing …	binding;DNA binding;nucleic acid binding;nucleic acid binding transcription factor activity;sequence-specific DNA binding transcription factor activity		Completeproteome;DNA-binding;Referenceproteome;Transcription;Transcriptionregulation		12	72.8	24.515	0	123.79	31.703	31.6567	31.8778	31.6463	24.4899	24.8747	24.2732	25.1729
1.52682	-2.71674	A6TE15	ygiX	biological regulation;biosynthetic process;cellular biosynthetic process;cellular macromolecule biosynthetic process;cellular macromolecule metabolic process;cellular metabolic process;cellular nitrogen compound metabolic process;cellular process;cellular response to stimulus;macromolecule biosynthetic process;macromolecule metabolic process;metabolic process;nitrogen compound metabolic process;n…	binding;DNA binding;nucleic acid binding		Completeproteome;Phosphoprotein;Referenceproteome;Transcription;Transcriptionregulation;Two-componentregulatorysystem		3	12.8	24.369	0.0092845	-0.55798	24.4988	24.1004	25.9511	23.7417	28.0385	28.0274	28.2764	24.8167
2.98619	-1.43093	A6TED1	uxaC	alcohol metabolic process;carbohydrate catabolic process;carbohydrate metabolic process;carboxylic acid catabolic process;carboxylic acid metabolic process;catabolic process;cellular carbohydrate metabolic process;cellular catabolic process;cellular ketone metabolic process;cellular metabolic process;cellular process;glucuronate catabolic process;glucuronate metabolic process;metabolic process;mo…	catalytic activity;glucuronate isomerase activity;intramolecular oxidoreductase activity;intramolecular oxidoreductase activity, interconverting aldoses and ketoses;isomerase activity		Completeproteome;Isomerase;Referenceproteome	Uronate isomerase	13	35.4	53.316	0	30.41	28.2026	27.9841	28.6299	27.7801	29.3754	29.2426	29.864	29.8383
1.4665	-2.01603	A6TED8	yqjE				Completeproteome;Referenceproteome		3	25	14.853	0	17.144	23.277	25.953	26.1342	25.4793	27.0795	28.2032	26.8741	26.7509
2.67352	1.47997	A6TEH7	yhbU		catalytic activity;hydrolase activity;peptidase activity		Completeproteome;Referenceproteome		10	39	37.006	0	62.299	30.2475	29.7915	29.7775	29.7169	28.8497	28.6785	27.6706	28.4146
1.40782	-5.48041	A6TEL5	yrbG	cellular process;establishment of localization;transmembrane transport;transport		cell part;integral to membrane;intrinsic to membrane;membrane part	Completeproteome;Referenceproteome		2	5.5	34.585	0.0033651	0.057424	24.1523	25.6786	23.9468	25.1532	32.3404	32.288	24.0839	32.1403
2.19631	2.91023	A6TET8	smg				Completeproteome;Referenceproteome	Protein Smg	3	33.6	17.954	0	86.407	26.1602	27.4018	28.1729	27.9353	23.5023	26.0717	24.3138	24.1415
1.85749	2.87007	A6TF04	codA		catalytic activity;hydrolase activity;hydrolase activity, acting on carbon-nitrogen (but not peptide) bonds		Completeproteome;Referenceproteome		3	8.9	48.944	0	8.118	27.2202	28.3792	28.2848	28.033	23.9792	25.185	23.9472	27.3254
1.42373	-2.57811	A6TFG5	KPN_03913		catalytic activity;kinase activity;phosphotransferase activity, alcohol group as acceptor;transferase activity;transferase activity, transferring phosphorus-containing groups		Completeproteome;Kinase;Referenceproteome;Transferase		11	46.9	33.114	0	23.428	28.6252	29.8975	32.637	28.6783	33.1934	32.0493	32.3441	32.5635
2.5631	2.3745	A6TFH0	yiaG		binding;DNA binding;nucleic acid binding;sequence-specific DNA binding		Completeproteome;Referenceproteome		3	32.3	11.184	0	6.5583	27.7239	28.8578	28.198	28.0436	26.5948	26.3846	24.7323	25.6137
2.53809	-2.68175	A6TFK0	lldD	carboxylic acid metabolic process;cellular ketone metabolic process;cellular metabolic process;cellular process;lactate metabolic process;lactate oxidation;metabolic process;monocarboxylic acid metabolic process;organic acid metabolic process;oxidation-reduction process;oxoacid metabolic process;small molecule metabolic process	binding;catalytic activity;coenzyme binding;cofactor binding;FMN binding;lactate dehydrogenase activity;nucleotide binding;oxidoreductase activity;oxidoreductase activity, acting on CH-OH group of donors	cell part;membrane;plasma membrane	Cellinnermembrane;Cellmembrane;Completeproteome;Flavoprotein;FMN;Membrane;Oxidoreductase;Referenceproteome	L-lactate dehydrogenase	3	11.2	43.008	0	1.8296	26.934	25.579	24.8554	24.6432	28.7713	28.0112	27.8768	28.0794
3.28656	2.46554	A6TFY4	KPN_04085	carbohydrate metabolic process;metabolic process;primary metabolic process	catalytic activity;hydrolase activity;hydrolase activity, acting on glycosyl bonds;hydrolase activity, hydrolyzing O-glycosyl compounds;oxidoreductase activity;oxidoreductase activity, acting on CH-OH group of donors;oxidoreductase activity, acting on the CH-OH group of donors, NAD or NADP as acceptor		Completeproteome;Glycosidase;Hydrolase;NAD;Referenceproteome		8	22.7	49.254	0	16.333	28.0619	28.8746	29.7272	28.5468	26.4897	26.537	26.1203	26.2013
2.59781	3.61938	A6TFY9	ibpB	biological regulation;posttranscriptional regulation of gene expression;protein stabilization;regulation of biological process;regulation of biological quality;regulation of gene expression;regulation of macromolecule metabolic process;regulation of metabolic process;regulation of protein stability		cell part;cytoplasm;intracellular part	Chaperone;Completeproteome;Cytoplasm;Referenceproteome;Stressresponse	Small heat shock protein IbpB	3	19.7	15.954	0	8.065	29.211	28.6857	28.7061	28.8538	25.4819	24.4359	23.9012	27.1602
1.41036	-3.41372	A6TG97	KPN_04202	biosynthetic process;cellular biosynthetic process;cellular macromolecule biosynthetic process;cellular macromolecule metabolic process;cellular metabolic process;cellular nitrogen compound metabolic process;cellular process;macromolecule biosynthetic process;macromolecule metabolic process;metabolic process;nitrogen compound metabolic process;nucleic acid metabolic process;nucleobase-containing …	binding;DNA binding;nucleic acid binding;nucleic acid binding transcription factor activity;sequence-specific DNA binding transcription factor activity		Completeproteome;DNA-binding;Referenceproteome;Transcription;Transcriptionregulation		2	6.6	36.565	0.0033803	0.23329	21.8336	21.2138	21.4816	21.2523	21.5781	25.6232	24.4737	27.7612
2.89048	2.06616	A6TGE7	fabR	biological regulation;biosynthetic process;carboxylic acid biosynthetic process;carboxylic acid metabolic process;cellular biosynthetic process;cellular ketone metabolic process;cellular lipid metabolic process;cellular macromolecule biosynthetic process;cellular macromolecule metabolic process;cellular metabolic process;cellular nitrogen compound metabolic process;cellular process;fatty acid bio…	binding;DNA binding;nucleic acid binding;nucleic acid binding transcription factor activity;sequence-specific DNA binding transcription factor activity	cell part;cytoplasm;intracellular part	Completeproteome;Cytoplasm;DNA-binding;Fattyacidbiosynthesis;Fattyacidmetabolism;Lipidbiosynthesis;Lipidmetabolism;Referenceproteome;Repressor;Transcription;Transcriptionregulation	HTH-type transcriptional repressor FabR	3	20.5	23.972	0	38.024	27.4801	26.6819	27.0617	27.2129	25.2821	24.9226	24.2163	25.751
2.07222	-1.51552	A6TGV4	yjbJ				Completeproteome;Referenceproteome		10	60.5	10.133	0	103.07	32.0357	32.0487	31.9499	32.2847	33.8907	33.9737	32.4395	34.0773
3.74982	8.90618	A6TGX3	bamA	cellular component assembly;cellular component assembly at cellular level;cellular component organization;cellular component organization at cellular level;cellular component organization or biogenesis;cellular component organization or biogenesis at cellular level;cellular localization;cellular macromolecule localization;cellular membrane organization;cellular process;cellular protein localizati…		cell outer membrane;cell part;external encapsulating structure part;integral to membrane;intrinsic to membrane;membrane;membrane part;outer membrane	Celloutermembrane;Completeproteome;Membrane;Referenceproteome;Repeat;Signal;Transmembrane;Transmembranebetastrand	Outer membrane protein assembly factor BamA	4	3.8	89.032	0.0077434	-0.36951	33.1806	34.609	33.9302	34.1642	23.1292	24.4125	28.0291	24.6885
2.3109	1.91284	A6TH35	KPN_04514		substrate-specific transmembrane transporter activity;substrate-specific transporter activity;transmembrane transporter activity;transporter activity		Completeproteome;Referenceproteome		2	3.1	91.015	0.0050223	-0.14249	29.5838	29.4516	29.0171	28.8795	27.138	27.1395	28.4658	26.5373
2.33411	1.54772	A6THH9	yjgM		acetyltransferase activity;catalytic activity;N-acetyltransferase activity;N-acyltransferase activity;transferase activity;transferase activity, transferring acyl groups;transferase activity, transferring acyl groups other than amino-acyl groups		Acyltransferase;Completeproteome;Referenceproteome;Transferase		3	19.2	18.156	0.00057703	1.042	26.9024	27.4776	27.62	26.9131	26.3514	26.0176	25.1545	25.1988
6.19681	2.11529	A6THK0	yjgB		binding;catalytic activity;cation binding;ion binding;metal ion binding;oxidoreductase activity;transition metal ion binding;zinc ion binding		Completeproteome;Metal-binding;Referenceproteome;Zinc		8	30.4	36.126	0	41.868	30.3557	30.5144	30.2284	30.1768	28.167	28.3883	28.1188	28.14
4.71907	3.87013	A6THT3	KPN_04771				Completeproteome;Referenceproteome		3	10.4	35.042	0	6.786	28.6127	28.4391	28.8778	28.4476	24.4668	23.9906	25.2299	25.2094
2.49296	-2.47583	A6THT6	yjiA				Completeproteome;Referenceproteome		2	8.7	36.174	0	9.2424	20.8773	21.9316	22.302	21.6594	24.6789	23.0578	24.9759	23.9611
3.25248	1.75437	A6TI69	KPN_pKPN3p05911	biological regulation;regulation of biological process;regulation of biosynthetic process;regulation of cellular biosynthetic process;regulation of cellular macromolecule biosynthetic process;regulation of cellular metabolic process;regulation of cellular process;regulation of gene expression;regulation of macromolecule biosynthetic process;regulation of macromolecule metabolic process;regulation…			Completeproteome;Plasmid;Referenceproteome		6	77.3	10.147	0	37.077	31.757	32.082	31.7684	31.7102	30.629	29.4545	30.2732	29.9435
5.3956	6.64618	A6TJ41	cmlA2	response to antibiotic;response to chemical stimulus;response to stimulus	acetyltransferase activity;catalytic activity;chloramphenicol O-acetyltransferase activity;O-acetyltransferase activity;O-acyltransferase activity;transferase activity;transferase activity, transferring acyl groups;transferase activity, transferring acyl groups other than amino-acyl groups		Acyltransferase;Antibioticresistance;Completeproteome;Plasmid;Referenceproteome;Transferase	Chloramphenicol acetyltransferase	6	34.7	25.676	0	57.482	31.5991	30.9403	31.0526	31.1306	23.801	24.2708	25.6483	24.4178
