# Supplementary material for: Iron Limitation in Klebsiella pneumoniae Defines New Roles for Lon Protease in Homeostasis and Degradation by Quantitative Proteomics
Source: Front Microbiol. 2020 Apr 24;11:546. doi: 10.3389/fmicb.2020.00546 (PMC7194016; doi:10.3389/fmicb.2020.00546)
Supplement: TABLE S5 — Significantly different proteins in secretome under replete (100 μM) vs. limited conditions. [file Table_5.XLSX]

## Sheet: Sheet1
(-)log10 p-value	Difference	Protein IDs	Gene name	GOBP name	GOMF name	GOCC name	Keywords	Protein name	Peptides	Sequence coverage [%]	Mol. weight [kDa]	Q-value	Score	LFQ intensity 1	LFQ intensity 2	LFQ intensity 3	LFQ intensity 4	LFQ intensity 5	LFQ intensity 6	LFQ intensity 7	LFQ intensity 8	LFQ intensity 9	LFQ intensity 10	LFQ intensity 11	LFQ intensity 12
1.43285	-2.49444	A6T5C2	phoR	biological regulation;regulation of biological process;regulation of biosynthetic process;regulation of cellular biosynthetic process;regulation of cellular macromolecule biosynthetic process;regulation of cellular metabolic process;regulation of cellular process;regulation of gene expression;regulation of macromolecule biosynthetic process;regulation of macromolecule metabolic process;regulation…	adenyl nucleotide binding;adenyl ribonucleotide binding;ATP binding;binding;catalytic activity;kinase activity;molecular transducer activity;nucleotide binding;phosphotransferase activity, alcohol group as acceptor;phosphotransferase activity, nitrogenous group as acceptor;protein histidine kinase activity;protein kinase activity;purine nucleotide binding;purine ribonucleoside triphosphate bindin…	cell part;integral to membrane;intrinsic to membrane;membrane part	ATP-binding;Completeproteome;Kinase;Nucleotide-binding;Phosphoprotein;Referenceproteome;Transferase	Histidine kinase	4	13.2	49.49	0	4.7669	28.7962	30.2802	30.4358	29.9786	30.0467	31.8039	31.3425	26.2192	25.9611	29.2012	25.8737	28.477
2.0406	4.44096	A6T5L6	rpmE2	biosynthetic process;cellular biosynthetic process;cellular macromolecule biosynthetic process;cellular macromolecule metabolic process;cellular metabolic process;cellular process;cellular protein metabolic process;macromolecule biosynthetic process;macromolecule metabolic process;metabolic process;primary metabolic process;protein metabolic process;translation	structural constituent of ribosome;structural molecule activity	cell part;cytoplasmic part;intracellular non-membrane-bounded organelle;intracellular organelle;intracellular part;macromolecular complex;non-membrane-bounded organelle;organelle;ribonucleoprotein complex;ribosome	Completeproteome;Referenceproteome;Ribonucleoprotein;Ribosomalprotein	50S ribosomal protein L31 type B	6	77	9.9441	0	50.607	26.5413	26.456	26.1664	26.1442	26.5579	26.7715	26.4452	25.9039	27.3826	32.5638	32.0283	31.097
2.95335	1.6602	A6T5R7	KPN_00488	cellular aromatic compound metabolic process;cellular metabolic process;cellular nitrogen compound metabolic process;cellular process;heterocycle metabolic process;metabolic process;nitrogen compound metabolic process;nucleobase metabolic process;nucleobase-containing compound metabolic process;nucleobase-containing small molecule metabolic process;primary metabolic process;purine base metabolic …	catalytic activity;hydrolase activity;hydrolase activity, acting on carbon-nitrogen (but not peptide) bonds;hydrolase activity, acting on carbon-nitrogen (but not peptide) bonds, in cyclic amides;hydroxyisourate hydrolase activity		Completeproteome;Hydrolase;Purinemetabolism;Referenceproteome	5-hydroxyisourate hydrolase	4	47.4	14.719	0	12.566	29.187	29.307	28.3738	29.3244	28.5032	29.4106	29.4538	29.3604	30.4415	30.8859	31.1039	30.4016
1.26017	-1.90284	A6T631	fepA	cation transport;establishment of localization;ion transport;iron chelate transport;iron ion transport;metal ion transport;siderophore transport;transition metal ion transport;transport	binding;cation binding;ion binding;iron ion binding;metal ion binding;receptor activity;transition metal ion binding	cell outer membrane;cell part;external encapsulating structure part;membrane;outer membrane	Celloutermembrane;Completeproteome;Membrane;Receptor;Referenceproteome;TonBbox		10	20.9	82.339	0	49.271	28.8205	30.5094	29.6116	29.4587	29.2276	28.8563	28.6648	28.1754	28.8749	29.0038	26.6133	26.2968
1.25977	-1.68129	A6T634	entF	biosynthetic process;metabolic process	catalytic activity;hydrolase activity;hydrolase activity, acting on ester bonds		Completeproteome;Phosphopantetheine;Referenceproteome		11	11.1	141.68	0	11.536	26.7842	29.4876	26.8875	26.8284	25.2155	23.4009	25.1563	25.2824	25.1888	26.3685	25.9321	25.7731
2.6002	-2.06504	A6T640	entC	biosynthetic process;metabolic process	catalytic activity;intramolecular transferase activity;intramolecular transferase activity, transferring hydroxy groups;isochorismate synthase activity;isomerase activity		Completeproteome;Referenceproteome		10	40.7	42.818	0	20.281	27.8	29.3378	28.1784	27.7194	24.8966	25.9326	26.5704	25.5529	26.7339	25.9547	26.0501	26.0367
1.90176	-1.82578	A6T641	entE	biosynthetic process;cellular biosynthetic process;cellular metabolic process;cellular process;cofactor biosynthetic process;cofactor metabolic process;metabolic process;nonribosomal peptide biosynthetic process;peptide biosynthetic process;peptide metabolic process;siderophore biosynthetic process;siderophore metabolic process	(2,3-dihydroxybenzoyl)adenylate synthase activity;adenylyltransferase activity;catalytic activity;ligase activity;nucleotidyltransferase activity;transferase activity;transferase activity, transferring phosphorus-containing groups		Completeproteome;Ligase;Referenceproteome		3	7.7	59.03	0	30.68	28.41	29.1396	28.0669	28.1508	26.8278	25.5591	25.9413	25.6485	25.7562	27.7518	26.0035	26.9527
2.67485	-2.64161	A6T642	entB		catalytic activity;ether hydrolase activity;hydrolase activity;hydrolase activity, acting on ether bonds;isochorismatase activity;leukotriene-A4 hydrolase activity		Completeproteome;Referenceproteome		8	39.2	31.945	0	8.0753	29.3218	30.2262	28.8328	28.7271	27.3277	27.5084	27.0544	27.2987	25.7711	26.3819	26.7954	27.5931
2.0521	2.10935	A6T684	pagP	biosynthetic process;cellular biosynthetic process;cellular lipid metabolic process;cellular metabolic process;cellular process;glycolipid biosynthetic process;glycolipid metabolic process;lipid A biosynthetic process;lipid A metabolic process;lipid biosynthetic process;lipid metabolic process;membrane lipid biosynthetic process;membrane lipid metabolic process;metabolic process;organophosphate m…	catalytic activity;O-acyltransferase activity;O-palmitoyltransferase activity;palmitoyltransferase activity;transferase activity;transferase activity, transferring acyl groups;transferase activity, transferring acyl groups other than amino-acyl groups	cell outer membrane;cell part;external encapsulating structure part;integral to membrane;intrinsic to membrane;membrane;membrane part;outer membrane	Acyltransferase;Celloutermembrane;Completeproteome;Membrane;Referenceproteome;Signal;Transferase	Lipid A palmitoyltransferase PagP	3	21.2	21.808	0	4.0467	27.1347	25.6323	26.7629	25.0955	28.5001	28.0848	28.5826	28.5493	27.4513	28.7513	28.4071	28.4531
4.82413	-1.08539	A6T6L5	bioB	amide biosynthetic process;biosynthetic process;biotin biosynthetic process;biotin metabolic process;carboxylic acid biosynthetic process;carboxylic acid metabolic process;cellular amide metabolic process;cellular biosynthetic process;cellular ketone metabolic process;cellular metabolic process;cellular nitrogen compound biosynthetic process;cellular nitrogen compound metabolic process;cellular p…	2 iron, 2 sulfur cluster binding;4 iron, 4 sulfur cluster binding;binding;biotin synthase activity;catalytic activity;cation binding;ion binding;iron ion binding;iron-sulfur cluster binding;metal cluster binding;metal ion binding;radical SAM enzyme activity;sulfurtransferase activity;transferase activity;transferase activity, transferring sulfur-containing groups;transition metal ion binding		2Fe-2S;4Fe-4S;Biotinbiosynthesis;Completeproteome;Iron;Iron-sulfur;Metal-binding;Referenceproteome;S-adenosyl-L-methionine;Transferase	Biotin synthase	19	63.9	38.68	0	323.31	31.894	31.5383	31.8262	31.8764	31.2284	30.8182	30.8142	30.7463	30.6597	30.7119	30.7537	30.668
3.52737	-1.18284	A6T7R8	phoC		acid phosphatase activity;catalytic activity;hydrolase activity;hydrolase activity, acting on ester bonds;phosphatase activity;phosphoric ester hydrolase activity	cell part;external encapsulating structure part;membrane;outer membrane-bounded periplasmic space;periplasmic space	Completeproteome;Hydrolase;Referenceproteome	Acid phosphatase	8	49.2	27.005	0	152.81	31.7913	31.5788	31.7741	31.6101	30.5515	30.7017	30.9429	30.6227	30.8565	30.1838	30.6285	30.3542
2.58142	-1.31132	A6T7V0	ydjN		active transmembrane transporter activity;anion transmembrane transporter activity;anion:cation symporter activity;carboxylic acid transmembrane transporter activity;catalytic activity;cation transmembrane transporter activity;dicarboxylic acid transmembrane transporter activity;inorganic cation transmembrane transporter activity;ion transmembrane transporter activity;kinase activity;metal ion tr…	cell part;integral to membrane;intrinsic to membrane;membrane part	Completeproteome;Kinase;Membrane;Referenceproteome;Transferase;Transmembrane;Transmembranehelix		4	11.2	48.854	0	6.5785	28.2398	28.2572	29.0189	27.843	27.9307	27.7385	27.5246	28.2058	27.2422	26.7546	27.0762	27.0407
2.37984	-1.26356	A6T7W0	yciD			cell outer membrane;cell part;external encapsulating structure part;integral to membrane;intrinsic to membrane;membrane;membrane part;outer membrane	Completeproteome;Receptor;Referenceproteome		4	31.7	24.336	0	57.357	30.7715	31.3966	31.5712	30.6965	30.1697	30.1441	30.1973	30.6154	29.3224	30.0454	29.9506	30.0632
3.43026	-1.55379	A6T8I7	paaH	carboxylic acid metabolic process;cellular ketone metabolic process;cellular lipid metabolic process;cellular metabolic process;cellular process;fatty acid metabolic process;lipid metabolic process;metabolic process;monocarboxylic acid metabolic process;organic acid metabolic process;oxoacid metabolic process;primary metabolic process;small molecule metabolic process	3-hydroxyacyl-CoA dehydrogenase activity;binding;catalytic activity;coenzyme binding;cofactor binding;oxidoreductase activity;oxidoreductase activity, acting on CH-OH group of donors;oxidoreductase activity, acting on the CH-OH group of donors, NAD or NADP as acceptor		Completeproteome;NAD;Oxidoreductase;Referenceproteome		3	9.3	51.015	0	7.5679	28.0403	27.6688	28.0599	27.9704	26.9389	26.0068	26.8484	25.0486	25.9356	26.2479	26.8716	26.4692
2.54149	-1.84941	A6T8I9	paaJ	alcohol catabolic process;alcohol metabolic process;benzene-containing compound metabolic process;carboxylic acid catabolic process;carboxylic acid metabolic process;catabolic process;catechol-containing compound catabolic process;catechol-containing compound metabolic process;cellular aromatic compound metabolic process;cellular catabolic process;cellular ketone metabolic process;cellular metabo…	catalytic activity;transferase activity;transferase activity, transferring acyl groups;transferase activity, transferring acyl groups other than amino-acyl groups		Acyltransferase;Completeproteome;Referenceproteome;Transferase		3	9	42.127	0.0086994	0.11172	28.384	28.48	29.0092	28.4018	27.2967	26.7682	26.4975	25.0861	27.6748	26.6383	26.586	25.9782
3.85308	-2.35133	A6T913	KPN_01653	amine transport;amino acid transport;carboxylic acid transport;establishment of localization;methionine transport;nitrogen compound transport;organic acid transport;organic substance transport;sulfur amino acid transport;sulfur compound transport;transport	active transmembrane transporter activity;adenyl nucleotide binding;adenyl ribonucleotide binding;ATP binding;ATPase activity;ATPase activity, coupled;ATPase activity, coupled to movement of substances;ATPase activity, coupled to transmembrane movement of substances;binding;catalytic activity;hydrolase activity;hydrolase activity, acting on acid anhydrides;hydrolase activity, acting on acid anhyd…	cell part;membrane;plasma membrane	Amino-acidtransport;ATP-binding;Cellmembrane;Completeproteome;Hydrolase;Membrane;Nucleotide-binding;Referenceproteome;Transport		7	37.6	28.39	0	21.88	29.5043	28.926	29.6975	29.4356	28.1048	27.4349	27.1878	27.4637	27.1487	27.0991	27.4808	26.4296
5.18932	-1.87653	A6T915	KPN_01655		binding;catalytic activity;cation binding;ion binding;iron ion binding;metal ion binding;oxidoreductase activity;oxidoreductase activity, acting on paired donors, with incorporation or reduction of molecular oxygen;oxidoreductase activity, acting on paired donors, with incorporation or reduction of molecular oxygen, 2-oxoglutarate as one donor, and incorporation of one atom each of oxygen into bo…		Completeproteome;Iron;Metal-binding;Oxidoreductase;Referenceproteome		10	35.1	38.639	0	80.106	30.1712	30.1727	30.236	30.0972	27.9903	27.6415	28.1265	28.3596	28.377	28.5116	27.932	28.3503
5.37476	-1.73395	A6T957	KPN_01697		binding;carbon-sulfur lyase activity;catalytic activity;cation binding;ion binding;lactoylglutathione lyase activity;lyase activity;metal ion binding		Completeproteome;Referenceproteome		8	65.1	14.405	0	311.39	32.7152	32.281	32.5881	32.4816	31.3888	31.2017	31.1342	31.3134	30.9574	30.6715	30.7511	30.75
3.18782	-1.77367	A6T961	KPN_01701	biosynthetic process;cellular biosynthetic process;cellular macromolecule biosynthetic process;cellular macromolecule metabolic process;cellular metabolic process;cellular nitrogen compound metabolic process;cellular process;macromolecule biosynthetic process;macromolecule metabolic process;metabolic process;nitrogen compound metabolic process;nucleic acid metabolic process;nucleobase-containing …	binding;DNA binding;nucleic acid binding;nucleic acid binding transcription factor activity;sequence-specific DNA binding transcription factor activity	cell part;intracellular	Completeproteome;DNA-binding;Referenceproteome;Transcription;Transcriptionregulation		11	62.8	29.25	0	61.202	30.7824	30.5288	30.4554	30.3916	29.7697	29.5175	29.6567	29.7134	29.5358	28.6361	28.4334	28.4582
5.10835	-1.01951	A6TA68	KPN_02061	acetoin catabolic process;acetoin metabolic process;catabolic process;cellular catabolic process;cellular ketone metabolic process;cellular metabolic process;cellular process;ketone catabolic process;metabolic process;small molecule catabolic process;small molecule metabolic process	acetoin dehydrogenase activity;catalytic activity;oxidoreductase activity;oxidoreductase activity, acting on CH-OH group of donors;oxidoreductase activity, acting on the CH-OH group of donors, NAD or NADP as acceptor		Completeproteome;Referenceproteome		12	59.4	26.672	0	126.69	32.1342	32.0292	32.165	31.9309	31.3398	31.2755	31.3127	31.3064	31.0791	31.1168	31.0835	30.902
2.9805	-2.67936	A6TAV9	KPN_02304	cation transport;establishment of localization;ion transport;iron chelate transport;iron ion transport;metal ion transport;siderophore transport;transition metal ion transport;transport	binding;cation binding;ion binding;iron ion binding;metal ion binding;receptor activity;transition metal ion binding	cell outer membrane;cell part;external encapsulating structure part;membrane;outer membrane	Celloutermembrane;Completeproteome;Membrane;Receptor;Referenceproteome;TonBbox		11	21.7	77.349	0	85.213	28.9128	30.0765	28.5615	28.6653	27.4074	27.5122	27.6683	25.7158	25.645	26.1772	26.7752	26.9013
1.61053	-2.21421	A6TB10	KPN_02355				Completeproteome;Referenceproteome		2	9.3	37.036	0.0069869	0.146	30.5648	27.2031	28.9092	29.1641	26.6617	27.2657	27.5722	27.5084	27.2441	26.1946	27.1902	26.3554
2.67309	2.74379	A6TB27	znuA	cation transport;establishment of localization;ion transport;metal ion transport;transport	binding;cation binding;ion binding;metal ion binding		Completeproteome;Referenceproteome		17	66.4	32.394	0	256.45	30.1398	30.4336	30.8847	30.6177	31.1852	30.9619	30.6092	30.6692	31.7607	34.0068	33.7407	33.5427
2.4232	1.67292	A6TB28	znuC		adenyl nucleotide binding;adenyl ribonucleotide binding;ATP binding;ATPase activity;binding;catalytic activity;cation transmembrane transporter activity;divalent inorganic cation transmembrane transporter activity;hydrolase activity;hydrolase activity, acting on acid anhydrides;hydrolase activity, acting on acid anhydrides, in phosphorus-containing anhydrides;inorganic cation transmembrane transp…	ATP-binding cassette (ABC) transporter complex;cell part;macromolecular complex;membrane part;protein complex	ATP-binding;Cellinnermembrane;Cellmembrane;Completeproteome;Hydrolase;Iontransport;Membrane;Nucleotide-binding;Referenceproteome;Transport;Zinc;Zinctransport	Zinc import ATP-binding protein ZnuC	6	29.2	27.601	0	8.5518	26.2021	26.6313	27.4364	26.4889	27.1384	27.2138	26.9067	27.502	27.6814	28.8896	28.5062	28.3732
3.35201	-2.50563	A6TBP0	cirA	establishment of localization;transport	receptor activity	cell outer membrane;cell part;external encapsulating structure part;integral to membrane;intrinsic to membrane;membrane;membrane part;outer membrane	Celloutermembrane;Completeproteome;Membrane;Receptor;Referenceproteome;TonBbox;Transmembrane;Transmembranebetastrand		9	19.7	71.126	0	59.472	29.1494	29.8973	28.8549	28.7523	26.2599	27.0552	25.8085	26.462	26.1223	27.3289	26.6802	26.4999
2.45326	-1.23719	A6TBQ1	uxuA	alcohol metabolic process;carbohydrate catabolic process;carbohydrate metabolic process;carboxylic acid catabolic process;carboxylic acid metabolic process;catabolic process;cellular carbohydrate metabolic process;cellular catabolic process;cellular ketone metabolic process;cellular metabolic process;cellular process;glucuronate catabolic process;glucuronate metabolic process;metabolic process;mo…	carbon-oxygen lyase activity;catalytic activity;hydro-lyase activity;lyase activity;mannonate dehydratase activity		Completeproteome;Iron;Lyase;Manganese;Referenceproteome	Mannonate dehydratase	6	21.5	44.769	0	21.532	29.1647	29.0361	29.4471	28.9455	28.1471	27.7476	28.4561	27.9521	28.0896	27.8659	28.4213	27.2679
0.840498	-2.35535	A6TBW4	nuoL	ATP synthesis coupled electron transport;cellular metabolic process;cellular process;electron transport chain;generation of precursor metabolites and energy;metabolic process;oxidation-reduction process;respiratory electron transport chain	catalytic activity;NADH dehydrogenase (quinone) activity;NADH dehydrogenase (ubiquinone) activity;NADH dehydrogenase activity;oxidoreductase activity;oxidoreductase activity, acting on NADH or NADPH;oxidoreductase activity, acting on NADH or NADPH, quinone or similar compound as acceptor	cell part;integral to membrane;intrinsic to membrane;membrane part	Completeproteome;Membrane;Referenceproteome;Transmembrane		5	11.6	66.354	0	39.955	30.6192	30.1198	29.3252	26.1361	26.259	29.8518	29.9519	26.2805	26.1949	29.5829	25.3794	25.6216
1.54938	-1.89874	A6TC71	eutL	response to external stimulus;response to stimulus			Completeproteome;Referenceproteome		2	12.6	21.32	0	4.6939	28.6815	27.9755	28.2266	28.181	26.5721	27.4858	26.673	27.4032	25.5387	28.0666	26.644	25.2203
1.6015	-1.8383	A6TC78	eutE		catalytic activity;oxidoreductase activity;oxidoreductase activity, acting on the aldehyde or oxo group of donors;oxidoreductase activity, acting on the aldehyde or oxo group of donors, NAD or NADP as acceptor		Completeproteome;Referenceproteome		5	15	49.086	0	9.555	28.3177	28.4086	28.4506	28.4891	27.8059	27.6834	25.9615	27.4531	27.113	24.8245	27.6795	26.6958
1.13251	3.00137	A6TCW3	KPN_03033	biological adhesion;cation transport;cell adhesion;cellular process;establishment of localization;ion transport;metal ion transport;transport	binding;cation binding;ion binding;metal ion binding		Completeproteome;Referenceproteome;Transport		8	37.9	31.016	0	94.366	26.7415	26.1548	26.2481	26.0879	28.0435	27.3038	25.3964	26.4567	25.6082	31.7074	31.0856	28.8366
1.73744	-1.98747	A6TEA7	dhaL	alcohol metabolic process;alditol metabolic process;carbohydrate metabolic process;cellular carbohydrate metabolic process;cellular metabolic process;cellular process;glycerol metabolic process;metabolic process;polyol metabolic process;primary metabolic process;small molecule metabolic process	catalytic activity;glycerone kinase activity;kinase activity;phosphotransferase activity, alcohol group as acceptor;transferase activity;transferase activity, transferring phosphorus-containing groups		Completeproteome;Kinase;Referenceproteome;Transferase		7	47.1	22.727	0	37.003	28.7146	28.4026	28.4254	28.4905	27.9161	28.1105	25.7931	25.4484	26.0689	27.4737	24.987	27.5535
4.31253	-1.08343	A6TEB4	lsrF		catalytic activity;lyase activity	cell part;cytoplasm;intracellular part	Completeproteome;Cytoplasm;Lyase;Referenceproteome;Schiffbase	Uncharacterized aldolase LsrF	12	52.2	32.411	0	67.76	29.0387	28.6946	28.9047	28.7143	28.5589	27.4994	27.7225	27.7327	27.7905	27.6009	27.9138	27.7134
5.57349	-1.47712	A6TED1	uxaC	alcohol metabolic process;carbohydrate catabolic process;carbohydrate metabolic process;carboxylic acid catabolic process;carboxylic acid metabolic process;catabolic process;cellular carbohydrate metabolic process;cellular catabolic process;cellular ketone metabolic process;cellular metabolic process;cellular process;glucuronate catabolic process;glucuronate metabolic process;metabolic process;mo…	catalytic activity;glucuronate isomerase activity;intramolecular oxidoreductase activity;intramolecular oxidoreductase activity, interconverting aldoses and ketoses;isomerase activity		Completeproteome;Isomerase;Referenceproteome	Uronate isomerase	27	66.1	53.316	0	104.69	32.6043	32.5778	32.6702	32.4386	31.6582	31.3869	31.3431	31.4194	31.148	31.1955	31.1574	30.8816
1.15562	-1.76864	A6TED6	yqjC				Completeproteome;Referenceproteome		3	21.3	14.142	0	17.959	28.8335	28.7422	28.838	29.0171	29.0305	29.0191	29.4247	29.1389	26.0684	27.5263	25.6064	29.1551
3.10104	1.75631	A6TEL7	yrbI	biosynthetic process;carbohydrate biosynthetic process;carbohydrate metabolic process;cellular biosynthetic process;cellular carbohydrate biosynthetic process;cellular carbohydrate metabolic process;cellular lipid metabolic process;cellular macromolecule biosynthetic process;cellular macromolecule metabolic process;cellular metabolic process;cellular polysaccharide biosynthetic process;cellular p…	3-deoxy-manno-octulosonate-8-phosphatase activity;catalytic activity;hydrolase activity;hydrolase activity, acting on ester bonds;phosphatase activity;phosphoric ester hydrolase activity		Completeproteome;Hydrolase;Referenceproteome		2	19.7	20.401	0	17.561	25.7353	26.6292	26.065	26.8867	28.1822	27.3246	26.8441	25.2706	28.2141	28.2907	27.8276	28.009
1.91425	2.25593	A6TF03	yhfC	cellular process;establishment of localization;transmembrane transport;transport		cell part;integral to membrane;intrinsic to membrane;membrane;membrane part;plasma membrane	Cellinnermembrane;Cellmembrane;Completeproteome;Membrane;Referenceproteome;Transmembrane;Transmembranehelix	Protein TsgA homolog	2	5.6	43.395	0	4.9756	25.5081	26.5558	28.3043	25.8822	25.7163	27.6329	26.9498	27.6559	28.5336	28.7304	29.2283	28.7818
3.72842	-1.12626	A6TF26	pckA	alcohol biosynthetic process;alcohol metabolic process;biosynthetic process;carbohydrate biosynthetic process;carbohydrate metabolic process;cellular biosynthetic process;cellular carbohydrate biosynthetic process;cellular carbohydrate metabolic process;cellular metabolic process;cellular process;gluconeogenesis;glucose metabolic process;hexose biosynthetic process;hexose metabolic process;metabo…	adenyl nucleotide binding;adenyl ribonucleotide binding;ATP binding;binding;carbon-carbon lyase activity;carboxy-lyase activity;catalytic activity;cation binding;ion binding;kinase activity;lyase activity;metal ion binding;nucleotide binding;phosphoenolpyruvate carboxykinase (ATP) activity;phosphoenolpyruvate carboxykinase activity;purine nucleotide binding;purine ribonucleoside triphosphate bind…	cell part;cytoplasm;intracellular part	ATP-binding;Completeproteome;Cytoplasm;Decarboxylase;Gluconeogenesis;Kinase;Lyase;Manganese;Metal-binding;Nucleotide-binding;Pyruvate;Referenceproteome;Transferase	Phosphoenolpyruvate carboxykinase [ATP]	16	39.6	59.533	0	37.808	30.2979	30.0974	30.4847	30.1034	29.4285	29.0489	29.1573	29.2061	29.2834	29.2872	29.0505	28.8572
4.02238	1.08127	A6TF53	gntU		aldonate transmembrane transporter activity;carbohydrate transmembrane transporter activity;carboxylic acid transmembrane transporter activity;gluconate transmembrane transporter activity;hexose transmembrane transporter activity;monocarboxylic acid transmembrane transporter activity;monosaccharide transmembrane transporter activity;organic acid transmembrane transporter activity;substrate-specif…	cell part;membrane	Completeproteome;Referenceproteome		5	14	43.7	0	15.807	28.6956	28.6943	28.6332	28.4837	29.1757	30.1699	29.6866	29.3225	29.4892	29.8628	29.9178	29.5619
1.81842	1.4055	A6TF61	yhhA				Completeproteome;Referenceproteome		3	47.2	11.966	0	109.27	25.6265	26.6826	26.7974	26.4171	26.3252	26.8089	26.7121	28.2627	27.1116	28.084	28.5439	27.4062
3.85755	-1.16026	A6TF88	zntA	cation transport;establishment of localization;ion transport;metal ion transport;transport	active transmembrane transporter activity;adenyl nucleotide binding;adenyl ribonucleotide binding;ATP binding;ATPase activity;ATPase activity, coupled;ATPase activity, coupled to movement of substances;ATPase activity, coupled to transmembrane movement of ions;ATPase activity, coupled to transmembrane movement of substances;binding;catalytic activity;cation binding;cation transmembrane transporte…	cell part;integral to membrane;intrinsic to membrane;membrane part	ATP-binding;Completeproteome;Hydrolase;Membrane;Nucleotide-binding;Referenceproteome;Transmembrane		6	10.2	77.094	0	7.9355	27.8243	27.8486	27.8465	27.9546	27.7372	26.6927	27.8112	27.4505	26.5741	27.1041	26.5564	26.5984
3.15506	1.97487	A6TFN1	dut	2'-deoxyribonucleotide biosynthetic process;2'-deoxyribonucleotide metabolic process;biosynthetic process;cellular biosynthetic process;cellular metabolic process;cellular nitrogen compound biosynthetic process;cellular nitrogen compound metabolic process;cellular process;deoxyribonucleoside monophosphate biosynthetic process;deoxyribonucleoside monophosphate metabolic process;deoxyribonucleoside…	binding;catalytic activity;cation binding;dUTP diphosphatase activity;hydrolase activity;hydrolase activity, acting on acid anhydrides;hydrolase activity, acting on acid anhydrides, in phosphorus-containing anhydrides;ion binding;magnesium ion binding;metal ion binding;nucleoside-triphosphate diphosphatase activity;pyrophosphatase activity		Completeproteome;Hydrolase;Magnesium;Metal-binding;Nucleotidemetabolism;Referenceproteome	Deoxyuridine 5'-triphosphate nucleotidohydrolase	3	36.8	16.162	0	14.501	26.9083	26.4441	27.6101	27.2694	28.5314	27.3496	28.9963	28.3856	29.404	29.2199	28.9461	28.5613
1.82705	-2.12634	A6TFN2	slmA	biological regulation;cell cycle;cell division;cellular process;negative regulation of barrier septum formation;negative regulation of biological process;negative regulation of cell division;negative regulation of cellular component organization;negative regulation of cellular process;negative regulation of cytokinesis;regulation of barrier septum formation;regulation of biological process;regula…	binding;DNA binding;nucleic acid binding;sequence-specific DNA binding	bacterial nucleoid;cell part;cytoplasm;intracellular non-membrane-bounded organelle;intracellular organelle;intracellular part;non-membrane-bounded organelle;nucleoid;organelle	Cellcycle;Celldivision;Coiledcoil;Completeproteome;Cytoplasm;DNA-binding;Referenceproteome	Nucleoid occlusion factor SlmA	4	26.3	22.824	0	6.5569	28.7803	28.7601	28.9191	28.6419	28.5739	28.9519	26.0042	28.8637	25.8682	26.1585	26.0483	28.521
1.06186	-2.06379	A6TG85	fdoG	cellular metabolic process;cellular process;cellular respiration;energy derivation by oxidation of organic compounds;generation of precursor metabolites and energy;metabolic process;oxidation-reduction process	binding;catalytic activity;cation binding;electron carrier activity;formate dehydrogenase (NAD+) activity;ion binding;metal ion binding;molybdenum ion binding;oxidoreductase activity;oxidoreductase activity, acting on the aldehyde or oxo group of donors;oxidoreductase activity, acting on the aldehyde or oxo group of donors, NAD or NADP as acceptor;transition metal ion binding	cell part;cytoplasm;intracellular part	Completeproteome;Metal-binding;Oxidoreductase;Referenceproteome		9	18.7	89.361	0	12.361	29.7386	29.0875	29.149	29.6257	28.5666	29.0913	26.1091	28.8491	25.9451	25.3137	28.9225	29.1642
1.93329	4.52641	A6TGD9	KPN_04244		binding;cation binding;ion binding;metal ion binding;transition metal ion binding;zinc ion binding		Completeproteome;Referenceproteome		5	32.4	24.525	0	52.394	25.2663	27.0938	26.7036	25.4894	26.3027	24.6809	26.132	28.2721	27.2127	32.4804	31.8222	31.1435
2.36662	4.11313	A6TGG7	KPN_04279	biosynthetic process;cellular biosynthetic process;cellular macromolecule biosynthetic process;cellular macromolecule metabolic process;cellular metabolic process;cellular nitrogen compound metabolic process;cellular process;macromolecule biosynthetic process;macromolecule metabolic process;metabolic process;nitrogen compound metabolic process;nucleic acid metabolic process;nucleobase-containing …	binding;DNA binding;nucleic acid binding;nucleic acid binding transcription factor activity;sequence-specific DNA binding transcription factor activity		Completeproteome;DNA-binding;Referenceproteome;Transcription;Transcriptionregulation		3	8.1	34.826	0.0035619	0.62515	25.6322	24.5109	26.7476	25.7366	31.6283	26.9167	27.8836	30.7309	30.2844	30.5537	30.8515	27.3902
1.76308	2.35254	A6TGN3	secE	cellular process;establishment of localization;establishment of localization in cell;establishment of protein localization;intracellular protein transmembrane transport;intracellular protein transport;intracellular transport;protein secretion;protein targeting;protein transmembrane transport;protein transport;protein transport by the Sec complex;secretion;secretion by cell;transmembrane transport…	active transmembrane transporter activity;macromolecule transmembrane transporter activity;P-P-bond-hydrolysis-driven protein transmembrane transporter activity;P-P-bond-hydrolysis-driven transmembrane transporter activity;primary active transmembrane transporter activity;protein transmembrane transporter activity;protein transporter activity;substrate-specific transmembrane transporter activity;…	cell part;integral to membrane;intracellular;intrinsic to membrane;membrane;membrane part;plasma membrane	Cellinnermembrane;Cellmembrane;Completeproteome;Membrane;Proteintransport;Referenceproteome;Translocation;Transmembrane;Transmembranehelix;Transport	Protein translocase subunit SecE	3	18.1	13.615	0	2.0133	26.72	25.9462	29.2512	26.7288	26.2133	30.3876	27.8541	26.7964	29.4897	29.6389	29.4261	29.5016
3.57295	2.6896	A6TGU4	malE		alpha-glucoside transmembrane transporter activity;carbohydrate transmembrane transporter activity;disaccharide transmembrane transporter activity;glucoside transmembrane transporter activity;maltose transmembrane transporter activity;substrate-specific transmembrane transporter activity;substrate-specific transporter activity;sugar transmembrane transporter activity;transmembrane transporter act…		Completeproteome;Referenceproteome		15	55.3	43.256	0	79.389	27.1866	28.443	27.046	27.4049	30.9347	31.2235	31.1023	30.7091	30.3585	30.5331	29.8034	30.1439
2.67611	2.12508	A6TGU5	malK		active transmembrane transporter activity;adenyl nucleotide binding;adenyl ribonucleotide binding;alpha-glucoside transmembrane transporter activity;ATP binding;ATPase activity;ATPase activity, coupled;ATPase activity, coupled to movement of substances;ATPase activity, coupled to transmembrane movement of substances;binding;carbohydrate transmembrane transporter activity;carbohydrate-importing AT…	ATP-binding cassette (ABC) transporter complex;cell part;macromolecular complex;membrane part;protein complex	ATP-binding;Cellinnermembrane;Cellmembrane;Completeproteome;Hydrolase;Membrane;Nucleotide-binding;Referenceproteome;Sugartransport;Transport	Maltose/maltodextrin import ATP-binding protein MalK	6	17.9	40.643	0	6.3773	25.1925	26.8916	26.737	25.9473	28.8682	29.0196	29.2785	28.4925	28.5567	28.1604	28.5101	28.0416
1.99865	-1.4418	A6THB8	cycA		active transmembrane transporter activity;amine transmembrane transporter activity;amino acid transmembrane transporter activity;carboxylic acid transmembrane transporter activity;organic acid transmembrane transporter activity;substrate-specific transmembrane transporter activity;substrate-specific transporter activity;transmembrane transporter activity;transporter activity	cell part;integral to membrane;intrinsic to membrane;membrane part	Completeproteome;Membrane;Referenceproteome;Transmembrane		4	7.7	51.202	0	19.506	29.2308	28.84	29.3833	29.1623	28.9805	28.181	28.4716	28.6716	28.2571	26.6129	27.9678	28.0114
2.36377	1.68372	A6THS7	yjiM				Completeproteome;Referenceproteome		10	31.6	42.671	0	21.606	25.8152	26.6214	27.564	26.9705	30.1469	30.5298	30.6416	30.0677	28.6858	28.3648	28.2143	28.4411
3.52421	-1.6792	A6THU9	hpaE		5-carboxymethyl-2-hydroxymuconic-semialdehyde dehydrogenase activity;catalytic activity;oxidoreductase activity;oxidoreductase activity, acting on the aldehyde or oxo group of donors;oxidoreductase activity, acting on the aldehyde or oxo group of donors, NAD or NADP as acceptor		Completeproteome;Oxidoreductase;Referenceproteome		12	49	53.01	0	59.856	30.4646	30.0984	30.7443	30.3051	29.0123	28.8123	29.0131	29.4555	29.1108	28.7432	28.7971	28.2445
2.81149	-1.24489	A6THV0	hpaG		5-carboxymethyl-2-hydroxymuconate delta-isomerase activity;5-oxopent-3-ene-1,2,5-tricarboxylate decarboxylase activity;carbon-carbon lyase activity;carboxy-lyase activity;catalytic activity;intramolecular oxidoreductase activity;intramolecular oxidoreductase activity, transposing C=C bonds;isomerase activity;lyase activity		Completeproteome;Referenceproteome		4	19.3	28.638	0	3.1075	28.5288	28.248	28.9873	28.3854	28.1946	27.2579	26.6042	26.0157	27.4581	27.0217	27.0259	27.6642
1.56492	1.71031	A6TI74	KPN_pKPN3p05916				Completeproteome;Plasmid;Referenceproteome		4	22	20.951	0	10.934	25.6008	25.8654	26.5262	27.8596	26.3178	26.2387	27.9901	26.9416	28.7779	28.4792	28.0626	27.3737
